# Supplementary material
Source: PubMed Central journal article supplement (PMC2923337)
Supplement: NIHMS59569-supplement-Supplement.pdf [file NIHMS59569-supplement-Supplement.pdf]

## **SUPPLEMENTARY INFORMATION**

### **Whole-genome alignment between human, mouse, rat and dog**

We constructed a whole-genome alignment for the four mammalian genomes using the program Blastz<sup>1</sup> and Multiz<sup>2</sup> in two steps: we first aligned human and dog sequences based on the human/dog syntenic map we generated (to be reported elsewhere, see Lindblad-Toh et al<sup>3</sup>). We then aligned the human/dog sequences to human/mouse/rat three-way alignment downloaded from UCSC genome browser (<http://genome.ucsc.edu/>) using the profile alignment provided in Multiz package. The assemblies used for this alignment are hg16/mm4/rn2/canFam0. We also tested results of the work in the four-way alignment released on the UCSC genome browser (hg17/mm5/rn3/canFam1). The full alignments are available from the UCSC genome browser.

### **Aligned promoter and 3'-UTR databases**

We constructed the aligned promoter and 3'-UTR database by extracting the portions of the genome-wide alignment whose coordinates correspond to the promoter and 3'-UTR regions respectively. These coordinates were obtained from the annotation of NCBI reference sequences (RefSeq)<sup>4,5</sup>.

For promoter regions, we extracted the 4kb segment centered around the annotated transcription start site (TSS) of each human RefSeq gene. If the annotated translation start codon was within 2kb of the TSS, then the shorter region was selected that did not overlap the protein-coding sequence. The 4kb region was chosen to allow sufficient coverage of real promoter sequences, given the small uncertainties in the experimental annotation of TSS sites for the majority of genes. However, choosing such a large segment also increased the percentage of nonfunctional sequences included; in particular, the 4kb region typically includes upstream intergenic segments devoid of regulatory elements, a portion of the 5'-UTR, and possibly portions of the first intron in the case of small non-coding first exons. For genes with alternatively spliced first exons, we included all promoters; when these overlapped, we included the overlapping portion only once. Thus, we ensured that no more than one copy of any promoter was included in the aligned databases, and that our statistical discovery methods were unbiased.

Another advantage of using a 4kb interval for the promoter alignments is that it accounts for any variability in transcription start sites (TSS) across species. To estimate this variability, we used 7878 orthologous human/mouse RefSeq pairs, for which the TSS was mapped in both species. We examined the distance between the two in the aligned promoter database. We found that 92% of TSS pairs were within 500 bp in the alignment, and 82% of them were within 200 bp (see Fig. S1). Since the aligned promoter database covered 2K bp around TSS of each gene, we reasoned that this range should be sufficiently large to include the functional TSS and promoter-proximal regulatory motifs in all four species.

For 3'-UTRs, we extracted the region of the alignment corresponding to the annotated human 3'-UTR in RefSeq, between the translation stop and the transcription stop, excluding introns. For alternatively spliced genes with multiple 3'-UTRs, we included every annotated 3'-UTR segment. When multiple segments overlapped, we included the overlapping portions only once. Thus, we ensured that no more than one copy of any 3'-UTR was included in the aligned databases, and that our statistical discovery methods were unbiased.

## Properties of the multiple alignment

We measure the proportion of aligned bases as the number of human bases participating in a local alignment across the four species (possibly with gaps), divided by the total number of nucleotides in the human. The overall proportion of aligned bases across the four genomes is 28% of the human, which is lower than the 40% aligned between human and mouse<sup>6</sup>. Thus, 70% of the sequences conserved between human and mouse are also conserved across the four species. This decrease in coverage is expected, and likely results from the transposable elements gained and lost in each of the lineages. A small fraction of the unaligned regions can also be attributed to possible sequence gaps in the dog genome, which will be described in detail elsewhere<sup>3</sup>.

In promoters and 3'-UTRs, the proportion of aligned bases was considerably higher, respectively ~51% for promoters and ~73% for the 3'-UTRs. This higher proportion compared to the rest of the genome is likely due to the numerous conserved regulatory elements in these regions. Also, the lower proportion in promoters as compared to 3'-UTRs is likely due to the inclusion of a higher percentage of nonfunctional sequences in the promoter database, due to the large region aligned around the TSS; this region includes both non-functional intergenic sequence, as well as less-conserved first introns.

Within aligned bases, we measured the evolutionary divergence of the four species, and constructed evolutionary trees, both in promoters and 3'-UTRs. Given the alignment, we used the program ClustalW<sup>7</sup> (<http://www.ebi.ac.uk/clustalw/>) to infer phylogenetic trees.

## Motif conservation score (MCS)

We represent regulatory motifs as consensus sequences (profiles), over an alphabet of 11 characters, consisting of the four nucleotides A,C,G,T, the six two-fold degenerate characters S=[CG], W=[AT], Y=[CT], R=[AG], M=[AC], K=[GT], and the four-fold degenerate character N=[ACGT]. An occurrence of a motif **m** is a sequence (over the alphabet ACGT) which matches the consensus of motif **m** at every position, namely contains one of the nucleotides allowed by the degenerate code at that position. The terms 'motif occurrence', 'motif instance', or 'match to the motif' are equivalent.

We define a conserved occurrence of a motif **m** as an instance of the motif in the human genome, for which an exact match to the motif is present in each of the four species. For fully specified motifs, this implies that the sequences are identical across the four species. For motifs with degenerate positions (containing ambiguity codes), all sequences need to match the motif, but they do not need to be identical to each other; the four species can contain different variants of the degenerate positions.

We define the conservation rate of a motif **m** as the number of human occurrences of **m** which are conserved across all four species, divided by the total number of human occurrences of **m**. We compute this conservation rate in aligned promoter regions, 3'-UTRs, and introns. Hence, the total number of human occurrences is computed only within these regions, and only for aligned human segments.

We evaluate the Motif Conservation Score (MCS) of a motif **m** of given length and degeneracy, by comparing its conservation rate **p** to the expected rate **p<sub>0</sub>**, estimated using similar random motifs of the same length and degeneracy (see below). Given the rate **p<sub>0</sub>**, we evaluate the binomial probability of observing **K** conserved instances out of total **N** instances in the human sequence for motif **m**. We report the MCS as a Z-score defined as  $MCS = (K - Np_0) / [Np_0(1 - p_0)]^{1/2}$ ,

which measures the number of standard deviations of conserved instances away from what is expected by chance when the null model is assumed to be binomial. Motifs with high motif conservation scores, are both highly conserved and frequently occurring, resulting in both an increased rate, and sufficient statistical significance given the large counts.

To estimate the conservation rate  $p_0$  expected for a motif  $\mathbf{m}$  of given length and redundancy, we observe the average conservation rate of 1000 random motifs of the same length and redundancy. To account for nucleotide compositional biases in the human genome, we generate these motifs by sampling the human genome. Namely, we select 1000 loci in the four-way species alignment, and extract the human sequences for each of these loci. Based on the degeneracy levels of  $\mathbf{m}$ , we generate a motif for each of these sequences, selecting a degeneracy code for each position matching the sequence of the human locus, and the degeneracy level of  $\mathbf{m}$  at that position. For example, if the first character of  $\mathbf{m}$  is two-fold degenerate and the first nucleotide at the selected locus is A, we pick a two-fold degenerate base containing A (W, R or M), and so on for every character of  $\mathbf{m}$ . We then evaluated, for every locus, whether the resulting random motif is conserved in the other three species, and summed across the 1000 loci. This total number of conserved motifs, divided by the 1000 randomly constructed motifs, was used to estimate the expected conservation rate  $p_0$ , under a random model.

We evaluated the MCS separately for each type of region (promoters, introns, 3'-UTR). This ensured that we match the specific nucleotide composition of each type of region, and therefore do not introduce biases in our scoring scheme. Additionally, for promoter motifs, we evaluated the MCS separately for sequences inside CpG islands and those outside CpG islands, to account for their radically different nucleotide compositions. Majority (~80%) of aligned promoter sequences were located outside CpG islands. To boost signal-to-noise-ratio for those sequences, we further used a sliding window of 50 bp and masked those with average nucleotide percent identify less than 60% across the four aligned species, and searched motifs and evaluated MCS only in nonmasked sequences. We defined CpG islands based on their coordinates that were downloaded from the UCSC genome browser.

### **Identifying conserved motifs through extensive consensus search**

We developed a method for identifying conserved motifs by exhaustive enumeration and testing of short sequence patterns. We enumerated all motifs of length between 6 and 26, over an alphabet of 11 characters (the four bases A, C, G, T, the six two-fold degenerate IUB codes R=[AG], Y=[CT], K=[GT], M=[AC], S=[GC], W=[AT], and the four-fold degenerate character N=[ATCG]). The number of motifs that can be formed by combining the 11 letters with various lengths is enormous, but it was still possible to screen most of them because only a small subset of them actually occurred in the database. We started by hashing the positions of all 6-mer motifs, possibly with gaps, and then searched and computed the MCS score for all possible extensions of these 6-mers. The method consisted of the following steps:

- (a) We first search and index all positions in the human genome containing a fully-specified 6-mer seed, possibly with a central gap between 0 and 10 non-specified bases. These seeds are of the form UVW-gap-XYZ, where U,V,W,X,Y,Z can be any nucleotide. This resulted in a total number 45,056 six-mers.
- (b) For each of these seeds, we extracted the four-way aligned sequence containing the aligned seeds and their neighboring sequences extending 5 nucleotides on each end.
- (c) We then enumerated all motifs that contain one of these seeds and have more than one instance in the aligned genomes.
- (d) We finally tested the conservation statistics of each of the resulting motifs and selected all motifs with MCS above 6.0

## Choosing an MCS cutoff

We chose  $MCS > 6$  as a cutoff for motif discovery. This cutoff was selected based on the excess conservation shown in red in figures 1 for promoters and 3'-UTRs. It was selected to capture most of the distribution in the excess conservation (red), while minimizing the non-excess motifs (white) above this cutoff. The table shows the number of 'red' and 'white' motifs, above and below the MCS cutoff of 6.

|                                      | MCS<6    | MCS>6   | Total |
|--------------------------------------|----------|---------|-------|
| Red (excess conservation motifs)     | FN=3.94  | TP=8.85 | 12.79 |
| White (expected in a Gaussian model) | TN=87.03 | FP=0.18 | 87.21 |
|                                      | N=90.97  | P=9.03  | 100   |

For  $MCS > 6$ , we capture 69.2% of the excess conservation (sensitivity= $8.85/12.79=69\%$ ), while ensuring that the vast majority of motifs above this cutoff are indeed 'red' motifs (specificity= $8.85/9.03=98.1\%$ ).

Thus,  $MCS > 6$  is a highly specific cutoff (98.1% specificity). Increasing the cutoff would result in lower the sensitivity, missing many real motifs.

## Motif clustering

After the motif enumeration and selection step, the resulting motifs with  $MCS > 6$  were highly redundant, since similar motifs could be derived by extending different 6-mers. We clustered these to obtain a non-redundant set.

We grouped the discovered motifs into clusters using two steps: genome-wide co-occurrence, and sequence similarity. We first used the genome-wide co-occurrence step to eliminate motifs that are largely redundant. Namely, if the genome-wide occurrences of two motifs overlapped by more than 80% of their sites, then we only kept the motif with the highest MCS score, and ignored the lower-scoring motif. We then clustered the remaining motifs based on their pairwise sequence similarity.

We evaluate the sequence similarity between two motifs as the Pearson correlation of their equivalent position weight matrices<sup>8</sup>. We first convert the consensus representation of each motif to the equivalent positional weight matrix, representing the frequencies of the four bases at each position of a motif. For example, if the first position of a motif was  $Y=[CT]$ , the first column of the weight matrix would be  $[A, C, G, T]=[0, 1/2, 0, 1/2]$ , and so on for each position. We then represent each motif of length  $L$  using a single vector, by concatenating the columns of its weight matrix (obtaining a vector of length  $4*L$ ). We then compute the Pearson correlation<sup>9,10</sup> between every alignment of two motifs, as they are scanned past each other, in both strands. At each alignment offset, we extended the motif vectors using nucleotide background frequencies so that all positions of two aligned motifs are matched. We then report the similarity score as the highest Pearson correlation across all alignments. This score ranges from  $-1$  to  $1$  and is maximal when the two motifs are exactly the same.

To form the clusters, we visited every motif in the order of decreasing MCS score, and compared each of them with the previous motifs visited. If a match was found between the current motif  $\mathbf{m}$

and a previously visited motif **n** above similarity score 0.75, then motif **m** was considered as a variant of motif **n**, and grouped with it. We continued thus until all motifs with MCS > 6 were grouped into clusters. For each cluster, we selected a representative motif as the one with the highest MCS. Finally, to reduce redundancy of motifs contained in the same cluster, we removed motifs that shared more than 0.85 similarity score with the cluster representative.

### **Coping with nucleotide compositional biases**

Genome-wide motif discovery in the human poses a number of challenges, especially stemming from the widely varying compositional biases found in the human. Importantly, CpG islands in human promoters have widely different sequence composition, di-nucleotide composition, and conservation properties than the rest of the genome. In this section, we specifically evaluate concerns about how these biases have affected our motif discovery.

(1) To account for the important variations in sequence composition that stem from CpG islands, we partitioned each promoter region into a portion associated with CpG-islands (if any), and the remainder of the promoter. We then calculated the MCS separately in three types of region (3'-UTRs, CpG-associated promoters, non-CpG-associated promoters). Thus, high-scoring motifs within CpG islands were those that showed significantly conservation when compared to other motifs in CpG islands.

(2) To account for the di-nucleotide, tri-nucleotide, and higher-order markov properties of the human genome, we constructed random motifs by directly sampling from the genome itself. For every motif **m** of length **L**, we sample 1000 regions of the genome (each of length **L**), hence capturing the di-nucleotide composition of these regions (this holds for 3'-UTRs, CpG-promoters, and non-CpG-promoters). Hence, when estimating the expected conservation rate of random motifs, we take into account the specific di-nucleotide properties of the human genome, in the particular region studied.

(3) Additionally, we asked whether motifs containing CpG have different conservation properties, but a first examination shows that in fact it is not the case. We considered the top 50 motifs (ranked by MCS), and counted the representation of CG di-nucleotides. We found that CG appears 23 times, out of 394 di-nucleotides in these motifs (6% of occurrences), which is nearly identical to what one would expect if all di-nucleotides were equally likely ( $394/16=24$  times). Hence, our computational algorithm is not favoring CG di-nucleotides in the most high scoring motifs.

(4) We also addressed similar concerns regarding the 3'-UTR regions. We compared the di-nucleotide counts of the top 30 and bottom 30 3'-UTR motifs, and found a correlation of  $R^2=0.9$ . Again, nucleotide composition doesn't seem to affect the MCS. We have also addressed these comments in the supplementary information.

(5) We then considered whether Transfac motifs may score poorly due to their different motif composition. We compared the di-nucleotide compositions of high-scoring Transfac motifs (MCS > 5) with the di-nucleotide composition of low-scoring Transfac motifs (MCS < 5). We found that the two sets have indeed very similar compositions. We quantified this observation by calculating the auto-correlation of the 16 di-nucleotide counts for each of the two distributions, and we found  $R^2=0.65$ , which is remarkably strong. Hence, high-scoring and low-scoring Transfac motifs have largely the same di-nucleotide composition. For CpG di-nucleotides in

particular, the counts were 22 and 19, respectively.

In summary, our computational and statistical methods were designed to capture the variability in sequence composition, both at the regional level, as well as the nucleotide level in the human genome. The end result is a motif discovery algorithm which is unbiased with respect to at least the most apparent sequence artifacts of the human genome.

### **Evaluating MCS for TRANSFAC motifs**

We extracted 460 mammalian transcriptional regulatory motifs from the TRANSFAC database (version 7.4, <http://www.gene-regulation.com/>), represented by positional weight matrices<sup>8</sup>.

We first collapsed the highly redundant set of motifs, using the same method and thresholds as for the discovered motifs (see Motif clustering section). This resulted in a smaller set of 123 motifs (shown in Table S1) using the weight matrix similarity measure described above (see Motif Clustering section).

To evaluate the MCS conservation score of Transfac motifs, we used the same method described earlier (see Motif Conservation Score (MCS) section), in terms of its excess conservation  $K/N$  as compared to the expected background rate  $p_\theta$ . The increased challenge was that Transfac motifs are described in terms of position weight matrices (PWM), not consensus sites. We therefore developed ways to (1) determine the conserved and non-conserved occurrences of a PWM motif, to obtain  $K$  and  $N$ , and (2) determine the expected neutral conservation rate for random similar matrices.

(1) We developed a computational method to evaluate whether a site matched a motif described by its position weight matrix. To do so, we used a log ratio test, comparing the likelihood that a site was generated by a given Transfac motif, as compared to the likelihood that the site was generated by a neutral background model. If the log ratio score between the two probabilities was above a given threshold, we counted the site as a match. Summing all the matches gave us  $N$ , the number of total occurrences in the human. If additionally, the site matched in all species, the site was counted as a conserved occurrence, and the sum of these gave us  $K$ . We used the following formula to determine the threshold of log ratio score:  $\theta = \min L + 0.7(\max L - \min L)$ , where  $\max L$  and  $\min L$  were the maximum and minimum log ratio scores the weight matrix could possibly achieve, depending on its total information content and its nucleotide composition.

(2) To compute the neutral conservation rate of a weight matrix, we used a sampling method. For each weight matrix, we randomly permuted the columns representing weights for each of four bases at each position, independently, to generate a set of control weight matrices<sup>11</sup>. The control set preserved the overall information content of the original weight matrix, but changed the nucleotide preferences at each column. We searched the control weight matrices counting total and conserved matches determined by log ratio score with the same threshold as the original weight matrix. The conserved number divided by the total number was used as an estimation of neutral conservation rate  $p_\theta$ .

We generated a database describing these matches of Transfac motifs. For every Transfac motif, the annotated occurrences, their corresponding log ratio scores, and the conservation were superimposed with the aligned promoter sequences. The data can be downloaded from: <http://www.broad.mit.edu/seq/HumanMotifs/>.

## Comparing the discovered motifs to the TRANSFAC motifs

We compared the 174 discovered motifs in the promoter database to TRANSFAC motifs using the motif comparison method described above (see the Motif clustering section), first converting the discovered motifs to position weight matrices, and then computing the corresponding Pearson correlation. If a motif matched one of the TRANSFAC motifs with similarity score above 0.85, we marked it as a strong match; otherwise, if one of its co-clustered motifs had a strong match to TRANSFAC motifs, we marked it a weak match. Overall, 72% of the 123 known TRANSFAC motifs showed matches to the highly conserved motifs. To estimate the probability of producing the observed number of matches by chance, we generated a TRANSFAC-like database of control motif, using the same procedure as for generating random motifs (see Motif Conservation Score section). For every TRANSFAC motif, we sampled a random human promoter segment, and constructed a random motif which matches the human segment, and whose degeneracy levels match the Transfac motif used. This procedure ensures that the random control motifs preserve the di-nucleotide composition of human motifs, and the same levels of degeneracy as Transfac motifs.

## Motif gene set enrichment analysis for expression data

We evaluated the tissue-specificity of each regulatory motifs by calculating the tissue-specificity of its target gene set, in a gene expression atlas of 75 human tissues<sup>12</sup>. We first preprocessed the expression data by normalizing the expression of each gene across all tissues to be mean zero and variance 1. We then ranked the genes based on their normalized expression values for each tissue, giving rise to 75 ranked gene lists.

For each motif  $\mathbf{m}$ , we generated three gene sets: a target gene set  $S_1$ , and two control gene sets  $S_2$  and  $S_3$ , with the same number of genes.

- (1) We first generated the motif gene set  $S_1$  of ‘conserved instances’, consisting of the inferred target genes for each motif. This set consisted of all genes whose promoters contained at least one conserved instance of the motif  $\mathbf{m}$ .
- (2) We then generated a control gene set  $S_2$  of ‘non-conserved instances’, by randomly sampling from genes containing non-conserved instances of the motif, until  $S_2$  contained the same number of genes as  $S_1$ .
- (3) We also generated a second control gene set  $S_3$  of ‘shuffled conserved instances’, by randomly sampling genes from the union of all conserved gene sets ( $S_1$ ), for all motifs.

We used the two control gene sets to evaluate the statistical significance of the tissue enrichment observed in the target gene set  $S_1$ , as compared to two similar but random gene sets with the same cardinality  $S_2$  and  $S_3$ .

We evaluated the enrichment of a motif  $\mathbf{m}$  in a given tissue, as the enrichment of its gene set  $\mathbf{S}$  in the ranked list for that tissue. We used the Mann-Whitney rank sum statistic<sup>13</sup> to evaluate the non-randomness of the ranks of  $\mathbf{S}$ , in the list  $\mathbf{L}$  specific to that tissue. We sum the ranks of genes in  $\mathbf{S}$  that appear in list  $\mathbf{L}$ . The significance of the rank sum is tested against rank sums of random subsets of the list  $\mathbf{L}$ , randomly permuted. Let  $\mu$  and  $\sigma^2$  be the mean and variance of the control rank sums. We define the Motif Gene Set Enrichment (MGSE) score to be  $(\mu - S)/\sigma$ , that is, the number of standard deviations smaller than the mean. This statistic is strongest when the items in  $\mathbf{S}$  are ranked at the top of the list  $\mathbf{L}$ .

For each motif, we computed the MGES for  $S_1$ ,  $S_2$ , and  $S_3$  in all 75 tissue-specific ranked gene lists. For the motif target list  $S_1$ , the best MGES among all tissues is annotated in Table 2 (if the

score was above 4.0 SD). We also computed the best MGES scores for the two control sets  $S_2$  and  $S_3$ , and we found that their scores were indeed much less than the target gene sets  $S_1$  (Fig. S2). Only a few non-conserved control sets  $S_2$  in the beginning of the motif list show enrichment score significantly higher than those from randomly permuted sets. The motifs corresponding to those sets have consistently high conservation rates. It is likely that the consensus sequences of these motifs are specific enough to indicate functionality, regardless of conservation.

### **Motif positional bias in promoters**

For every motif  $m$ , we tested the presence of a positional bias in the distance distribution between its instances and the TSS. We identified all sites where a motif occurred in human promoters (without requiring conservation) and recorded their positions relative to TSS. We then divided the region (-2000, 2000) bp around TSS into 100 bins, and counted the number of sites located in each of the bins. We computed the mean and variance on the distribution of the number of sites in different bins, and converted the number of sites in each bin to a  $Z$ -score measuring the number of standard deviations away from the mean. Positional clustering of the motif was counted as significant if there existed a bin with  $Z$ -score above 5.0, in which case the biased position was determined by the location of the bin.

### **Conserved 8-mer motifs in 3'-UTR**

We evaluated the conservation rates of all 8-mers (total 65,536) in the 3'-UTR, and selected 540 8-mers (0.8% of all) with conservation rate above 0.18 (vs 0.076 for random 8-mers) and having at least 6 conserved instances. Many of these 8-mers were highly similar to each other, and we clustered them based on their sequence similarity. We used a stringent criterion for clustering, requiring that all 8-mers in a cluster share at least six consecutive nucleotides with the cluster representative (the 8-mer with the highest conservation rate). This resulted in 72 clusters of 8-mers, each with a cluster representative. We used the representative motif to refer to the set of motifs contained in the same cluster.

### **Estimation of the number of miRNA targets**

We observed that about 40% of human 3'-UTRs contain at least one copy of the conserved 8-mers. We used a control set of random 8-mers, with equal number of motifs, to estimate the number of 3'-UTRs that could be hit by chance because of basal conservation rates of random control motifs. Since most of the conserved 8-mers discovered in 3'-UTRs had strong strand-bias (Fig. 4A), we used their reverse complemented sequences as our controls, which preserved CG content and basic nucleotide compositions of the conserved 8-mer motifs. We found about 25% of human 3'-UTRs contained one of the conserved control motifs.

Let  $p$  be the proportion of 3'-UTRs with a biologically meaningful miRNA target. Then,  $1-p$  is the proportion without biologically meaningful target. Since the frequency of conserved control occurrences is 25%, the proportion of these genes with a conserved site is  $(1-p)*0.25$ . We thus have  $p + 0.25(1-p) = 0.40$ , so  $p = 0.20$ . This estimated that about 20% of human genes were targeted by miRNAs.

### **MicroRNA datasets and pairing of conserved 8-mers to miRNAs**

A set of 207 human miRNAs representing 222 human miRNA genes was downloaded from Rfam miRNA registry (Release 5.1, <http://www.sanger.ac.uk/Software/Rfam/mirna/>).



For each of the miRNAs, we identified all matching 8-mers with Watson-Crick (W-C) pairing from the list of 540 most conserved 8-mers discovered in 3'-UTR. We found that 90 of these miRNAs (43%) have matches within these 8-mers. For comparison, we evaluated the pairing of miRNAs to three control sets of 8-mers with equal number of motifs (540): a random set, the set of most conserved 8-mers from 5'-UTRs and the set of most conserved 8-mers from coding exons. These matched to 2%, 3.7% and 9.6% of miRNAs respectively.

Moreover, we found that when the 8-mer motifs matched known miRNAs genes, they matched specifically the first two positions from the 5' end of the miRNA in 95% of the time (Fig. 4d). To reduce the chance of random pairing, we further identified 8-mers that matched to 5' miRNAs by restricting W-C pairing at only the first two positions (Table S6). For miRNAs that did not match to a conserved 8-mer, we relaxed the requirement of strict W-C pairing and allowed one mismatch. The list of miRNAs with one-base mismatched 8-mers is shown in Table S6 with mismatched bases indicated.

### **Identification of new miRNAs**

We then sought to identify new miRNA genes based on the 540 highly-conserved 8-mers discovered in 3'-UTRs. We first identified conserved occurrences of the 8-mer motifs in the entire human genome, searching both strands for motifs reverse complementary to each 8-mer. In this search, we excluded genomic positions that overlapped annotated genes.

We then searched for stable stem-loops in neighborhoods of these alignments. We extracted the aligned neighborhoods of these conserved sites with 100 bp on each side. A sliding window of 110 bp with an increment of 3 bp was scanned along the extracted sequences. The windows containing the motif sites were folded using the program RNAfold<sup>14</sup>, and those with a folding free energy of at least 25 kcal/mol in all aligned species were selected. Each identified window was further examined for pairing and alignment of the core 22-mer sequence containing the original motif at 5' end. We selected the windows whose core sequences were located only in one stem of the folded RNA structure, formed at least 16 base-pairings, and had at least 18 bases conserved in four species. The regions passing these criteria were selected as conserved stable stem-loops.

A total number of 440 conserved stable stem-loops were identified, including 124 known miRNA genes (56% of the total 222). The list included almost all known miRNAs that matched to conserved 3'UTR 8-mer motifs in the previous search, except a small number that was missing due to sequence gaps in one of the mammalian genomes.

We further evaluated these 440 stem-loops using the program MiRScan<sup>15</sup>. For each stem loop, we compared the sequence of human to the aligned sequences of mouse, rat and dog, and scored the three pairs using MiRScan. We further selected only those predictions with a threshold score of at least 13 for all three pairs, narrowing down the predictions to a list of 258 candidate miRNA genes (Table S8). These included 114 known human miRNA genes and 144 candidate novel miRNA genes.

### **Experimental verification of predicted miRNA genes**

We selected 12 of these 144 predicted miRNA genes for experimental validation. These were selected at a range of MiRScan scores, and a range of folding free energy, such that they are representative of the set of all 258 predicted miRNAs (Table S3).

We used a method of PCR amplification followed by sequencing verification (see Lau et al<sup>16</sup>) on a pool of adaptor-ligated 18-26mer RNAs to verify the expression of the predicted miRNAs. This experimental procedure is carefully designed to ensure that there is no contamination with genome DNA:

1. It includes three steps of rigorous PAGE purification of small RNA fractions in the process of microRNA cloning/PCR verification. Large RNA and genomic DNA are purified away.
2. PCR is done with one primer complementary to the artificial adaptors used in ligating the microRNAs, and a gene specific primer. Genomic DNA thus would not contain the ligation-specific adaptor sequence, and hence would not be amplified.
3. Finally, the sequencing of the resulting clones shows that the product has the precise expected sequence and precise expected junction. This would not occur with genomic DNA.

Small RNAs (18 to 26-mer) from 10 human tissues (breast, pancreas, prostate, colon, stomach, uterus, lung, brain, liver and kidney) were purified through a 15% denaturing polyacrylamide gel. Purified small RNAs were subjected to two steps of adaptor ligations to both the 5' and the 3' ends of miRNAs, with denaturing PAGE purifications after each ligation step, as described by Miska et al<sup>17</sup>. The sequences for the adaptors were artificially designed (5' adaptor: acggaattcctactAAA; 3' adaptor: pUUUaacgcgaattccagidT, where p: phosphate; upper-case: RNA base; lower case: DNA base; idT: inverted dT). Ligation products were reverse-transcribed using a primer specific to the 3' adaptor sequence. These cDNAs were pooled and diluted 1000-fold as the substrate for the subsequent PCR reactions. The substrate was amplified in PCR reactions with a common 5' primer (0.1  $\mu$ M, 5'-CAACGGAATTCCTCACTAAA-3'), corresponding to the 5' adaptor sequence, and miRNA-specific 3' primers (1  $\mu$ M), for 25 cycles at 50 °C of annealing temperature. The miRNA-specific 3' primers were designed to match 3' end of the predicted miRNAs, but allowing 6-7 bases in the 5' end for sequencing verification. The products of the first-round PCR reactions were diluted 20-fold and amplified for a second-round of 25 cycles with the same reaction conditions. The products of the second-round PCR were cloned into the TOPO PCR4 vector (Invitrogen), following the manufacturer's protocol. The inserts of the clones were PCR-amplified with M13-forward and M13-reverse primers and sequenced both directions with M13-forward and M13-reverse primers to verify the 5'-end of predicted miRNAs. A predicted miRNA was verified only if the sequenced 5' end had the same length and exactly matching sequence as the predicted miRNAs. The list of used primers is shown in Table S6.

## Supplementary References

1. Schwartz, S. et al. Human-mouse alignments with BLASTZ. *Genome Res* **13**, 103-7 (2003).
2. Blanchette, M. et al. Aligning multiple genomic sequences with the threaded blockset aligner. *Genome Res* **14**, 708-15 (2004).
3. Lindblad-Toh, K. & al, e. Initial sequencing and analysis of the dog genome (In preparation). (2005).
4. Maglott, D. R., Katz, K. S., Sicotte, H. & Pruitt, K. D. NCBI's LocusLink and RefSeq. *Nucleic Acids Res* **28**, 126-8 (2000).
5. Pruitt, K. D., Tatusova, T. & Maglott, D. R. NCBI Reference Sequence project: update and current status. *Nucleic Acids Res* **31**, 34-7 (2003).
6. Waterston, R. H. et al. Initial sequencing and comparative analysis of the mouse genome. *Nature* **420**, 520-62 (2002).
7. Thompson, J. D., Higgins, D. G. & Gibson, T. J. CLUSTAL W: improving the sensitivity of progressive multiple sequence alignment through sequence weighting, position-specific gap penalties and weight matrix choice. *Nucleic Acids Res* **22**, 4673-80 (1994).
8. Stormo, G. D. DNA binding sites: representation and discovery. *Bioinformatics* **16**, 16-23 (2000).
9. Pietrokovski, S. Searching databases of conserved sequence regions by aligning protein multiple-alignments. *Nucleic Acids Res* **24**, 3836-45 (1996).
10. Hughes, J. D., Estep, P. W., Tavazoie, S. & Church, G. M. Computational identification of cis-regulatory elements associated with groups of functionally related genes in *Saccharomyces cerevisiae*. *J Mol Biol* **296**, 1205-14 (2000).
11. Kellis, M., Patterson, N., Birren, B., Berger, B. & Lander, E. S. Methods in comparative genomics: genome correspondence, gene identification and regulatory motif discovery. *J Comput Biol* **11**, 319-55 (2004).
12. Su, A. I. et al. A gene atlas of the mouse and human protein-encoding transcriptomes. *Proc Natl Acad Sci U S A* **101**, 6062-7 (2004).
13. Hollander, M. & Wolfe, D. A. *Nonparametric statistical methods* (J. Wiley, New York, 1999).
14. Fontana, W. et al. RNA folding and combinatorial landscapes. *Physical Review. E. Statistical Physics, Plasmas, Fluids, and Related Interdisciplinary Topics* **47**, 2083-2099 (1993).
15. Lim, L. P., Glasner, M. E., Yekta, S., Burge, C. B. & Bartel, D. P. Vertebrate microRNA genes. *Science* **299**, 1540 (2003).
16. Lau, N. C., Lim, L. P., Weinstein, E. G. & Bartel, D. P. An abundant class of tiny RNAs with probable regulatory roles in *Caenorhabditis elegans*. *Science* **294**, 858-62 (2001).
17. Miska, E. A. et al. Microarray analysis of microRNA expression in the developing mammalian brain. *Genome Biol* **5**, R68 (2004).

**Figure S1.** Distribution of transcription starting sites (TSS) differences between 7878 orthologous human/mouse gene pairs. TSS difference between a gene pair was the distance in the mouse genome between the position aligned to human TSS and the annotated mouse TSS. The annotations of TSS for both human and mouse were based RefSeq<sup>4,5</sup>.

**Figure S2.** Tissue specificity of expression for genes containing discovered motifs. For each discovered motif, three gene sets are generated:  $S_1$  contains all genes with conserved occurrences of the motif and two equal-sized control sets  $S_2$  and  $S_3$ .  $S_2$  is a control for the specific motif, containing a random subset of genes in which the motif occurs in the human genome but is not conserved.  $S_3$  is a general control, containing a random set of genes randomly drawn from the union of the sets  $S_1$  for all motifs. Tissue-specific enrichment of gene sets was tested using a database of 75 RNA expression in human tissues<sup>12</sup>. For each set, an enrichment score was calculated for each tissue. Shown here are enrichment scores of 175 discovered motifs, represented in pseudo color, for conserved motif gene set (a) and non-conserved motif gene set (b). Similar to  $S_2$ , the control set  $S_3$  also showed little enrichment in the same tissues.

**Table S1.** List of 123 promoters motifs in the TRANSFAC database, ranked by MCS, and related discovered motifs. Matching bases shown in bold. Known motif: consensus of the TRANSFAC motif. Discovered motif: consensus of the discovered motifs from the aligned promoter database. MCS: Motif conservation score.

**Table S2.** List of 174 discovered promoter motifs, ranked by MCS. MCS: Motif conservation score. Known factor: name of best matching motif in TRANSFAC database, if any. Maximum Tissue Enrichment Score (see legend to Figure S2). Position bias: Mode of position for highly clustered motifs, shown for cases with positional clustering score above 5 standard deviations. Weak matches to known motifs are indicated by '\*'.

**Table S3.** List of 174 discovered promoter motifs and motif variants grouped in the same clusters. Conserved num: Number of conserved instances. Total num: Number of total instances. MCS: motif conservation score. Known factor: name of the best matching motif in TRANSFAC database, if any.

**Table S4.** List of 106 motifs discovered in 3'-UTR regions and motif variants grouped in the same cluster. Conserved num: Number of conserved instances. Total num: Number of total instances. MCS: motif conservation score.

**Table S5.** List of 72 known 8-mer motifs discovered in 3'-UTRs. Motifs in each cluster share at least six consecutive nucleotides as the most conserved 8-mer in the cluster, which is chosen as a representative of the cluster. Matched miRNA: known and predicted miRNAs that match to the conserved 8-mers (the predicted miRNAs start with 'MIR' followed by a number without dash.).

**Table S6.** List of 90 known miRNA sequences that can form W-C pairing to the conserved 8-mer motifs discovered in 3'-UTR. Matched sequences in miRNAs are highlighted in lower cases. C: Number of the conserved instances of the motif. N: Number of the total number of instances of the motif. Pc: Conservation rate of the motif. The table also included an additional list of 27 miRNAs that can pair to the conserved 8-mers when one mismatch was allowed. The list of one-base mismatched miRNAs was grouped into three categories, including 4 miRNAs containing T-G pairing, 10 miRNAs with mismatched first 5' nucleotide to letter 'A' of the conserved 8-mer motifs, and other mismatches.

**Table S7.** List of 60 3'-UTR motifs not related to miRNA regulations. The motifs are ranked by MCS. MCS: motif conservation score. Total Num: the total number of sites found in 3'-UTR. Conserved Num: the number of conserved sites found in 3'-UTR. Pc: conservation rate.

**Table S8.** List of 258 predicted miRNA genes. Please refer to online link:  
<http://www.broad.mit.edu/seq/HumanMotifs/>

**Table S9.** List of 13 tested miRNA genes. Please refer to online link:  
<http://www.broad.mit.edu/seq/HumanMotifs/>

**Table S10.** List of 3' primers used for PT-PCR amplification. 12 predicted novel miRNAs were tested. The ~22 bp sequences downstream of the seed 8-mers were predicted as mature products, and were used to design 3' primers.

**Table S11.** List of 11 predicted miRNAs that show high sequence similarity to known miRNAs.

**Dataset D1:** Aligned promoter database.  
<http://www.broad.mit.edu/seq/HumanMotifs/>

**Dataset D2:** Aligned 3'-UTR database.  
<http://www.broad.mit.edu/seq/HumanMotifs/>

**Dataset D3:** Genomic locations of conserved motifs.  
<http://www.broad.mit.edu/seq/HumanMotifs/>

**Dataset D4:** Sites of TRANSFAC motifs annotated in aligned promoter database.  
<http://www.broad.mit.edu/seq/HumanMotifs/>

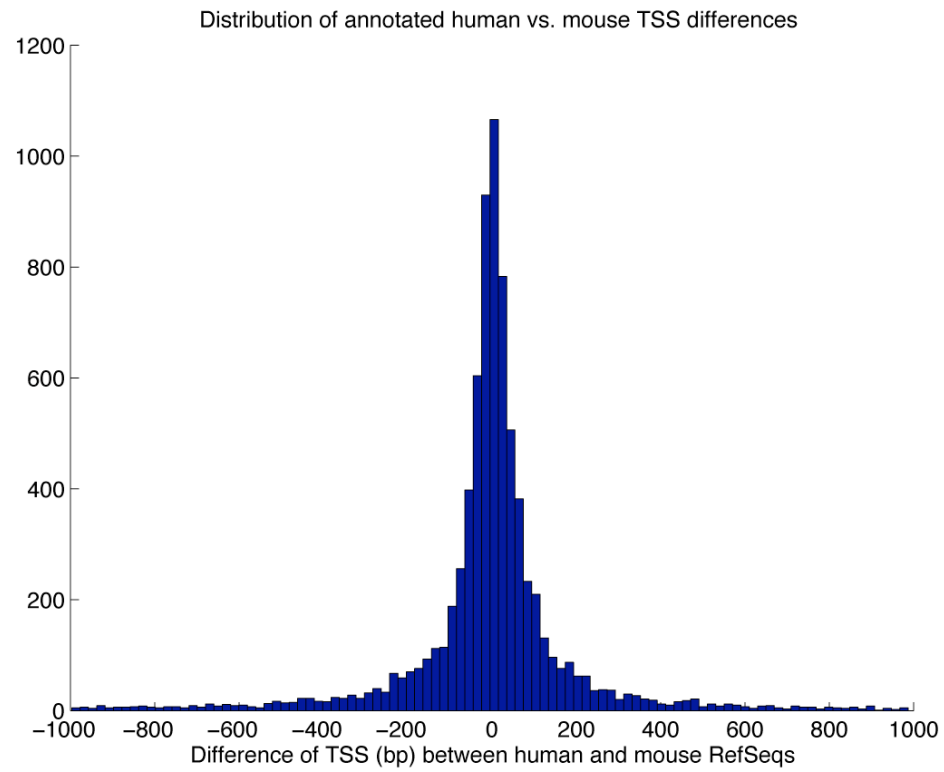

Fig. S1

### a Conserved motif gene set ( $S_1$ )

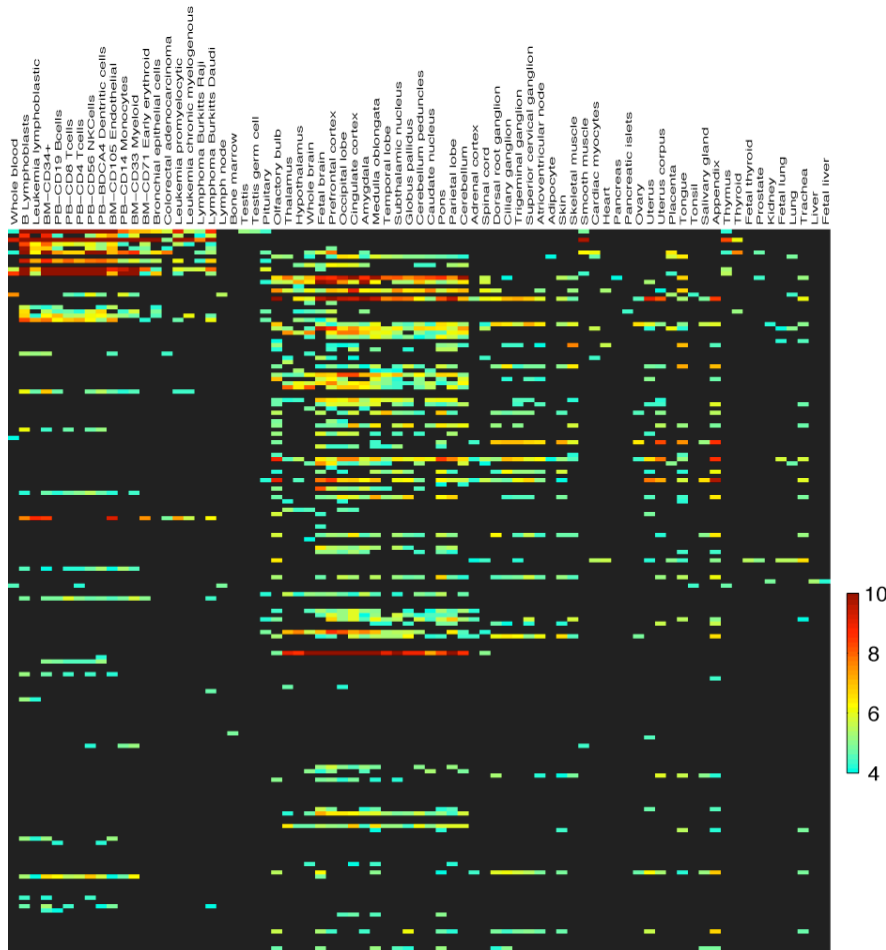

### b Nonconserved motif gene set ( $S_2$ )

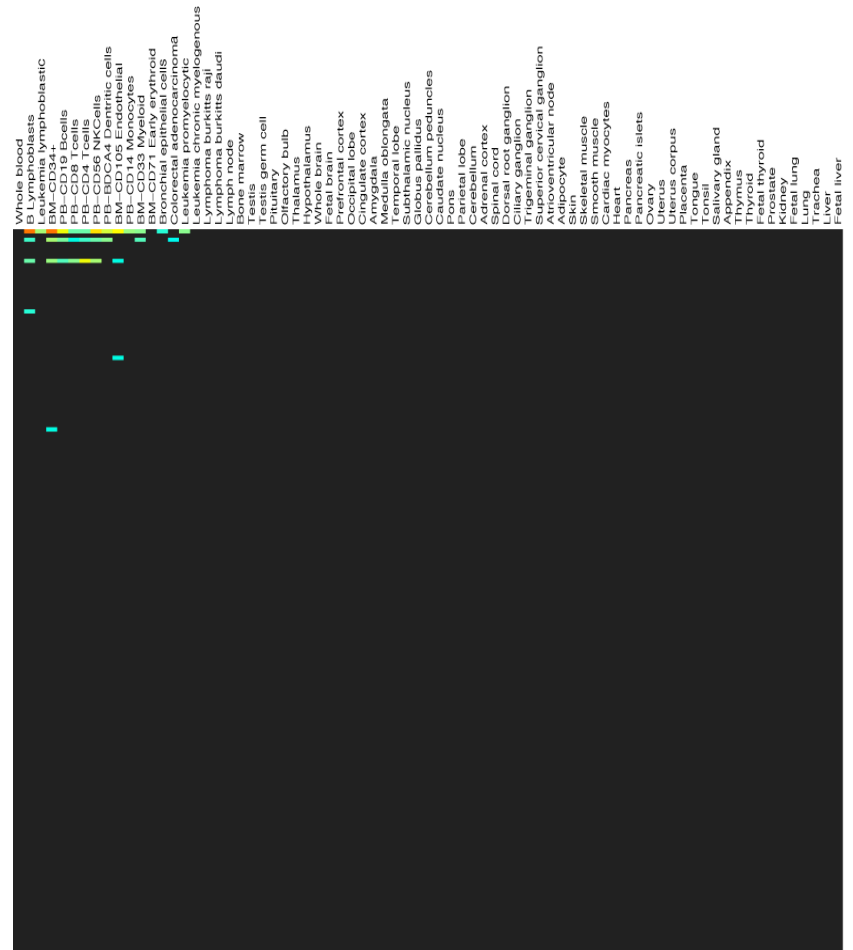

Fig. S2

Supplementary Table S1 Known promoter regulatory elements and related discovered motifs

| Factor    | Known motif                | MCS  | Discovered motif  | Factor          | Known motif               | MCS  | Discovered motif      |
|-----------|----------------------------|------|-------------------|-----------------|---------------------------|------|-----------------------|
| SP-1      | <b>GGGGCGGGGC</b>          | 46.8 | <b>GGGGCGGR</b>   | IRF             | <b>bnCRSTTTCAntTYY</b>    | 4.6  | <b>STTTCRnTTT</b>     |
| YY1       | <b>GCCATnTT</b>            | 34.7 | <b>GCCATnTTG</b>  | GATA            | <b>WGATAR</b>             | 4.6  | <b>WGATAAGR</b>       |
| MYC       | <b>SCACGTG</b>             | 32.7 | <b>CACGTG</b>     | MYB             | GnCnGTT                   | 4.4  | -                     |
| NF-Y      | <b>YSATTGGYY</b>           | 31.2 | <b>GATTGGY</b>    | MIF-1           | <b>GTTGCWGGYAAcNcGS</b>   | 4.3  | <b>RYTGCnnRGnAAC</b>  |
| AP-1      | <b>CTGASTCA</b>            | 30.8 | <b>TGAnTCA</b>    | HSF2            | <b>GAAnnWTCK</b>          | 4.0  | <b>RGAAAnnTTC</b>     |
| MAZ       | <b>GGGGAGGG</b>            | 29.7 | <b>GGGAGGRR</b>   | HNF-1           | <b>GGTTAATnWTTAMC</b>     | 4.0  | <b>RGTTAMWnATT</b>    |
| CREB      | <b>TGACGTMA</b>            | 29.5 | <b>TGACGTMR</b>   | AREB6           | <b>WCAGGTGWnW</b>         | 3.8  | <b>CAGGTG</b>         |
| NF-MUE1   | <b>CGGCCATCT</b>           | 26.0 | <b>CGGCCATYK</b>  | C-REL           | <b>SGGRnTTTCC</b>         | 3.6  | <b>GGGnnTTTCC</b>     |
| MYOD      | <b>RnCAGGTG</b>            | 24.7 | <b>CAGGTG</b>     | TAL-1ALPHA/E47  | <b>AACAGATGKT</b>         | 3.4  | <b>MCAGATGK</b>       |
| ELK-1     | <b>CCGGAART</b>            | 22.6 | <b>CCGGAARY</b>   | POU6F1          | <b>GCATAAWTTAT</b>        | 3.4  | <b>TAATTTATK</b>      |
| NRF-1     | <b>YGCGCATGCG</b>          | 20.9 | <b>RCGCAnGCGY</b> | FREAC-4         | <b>CTWAWGTAAACnWG</b>     | 3.4  | <b>RRGTAAACA</b>      |
| TEL-2     | <b>CAGGAAGTAR</b>          | 20.8 | <b>SMGGAAGT</b>   | BRN-2           | <b>YKnATTWYSnATG</b>      | 3.4  | -                     |
| GABP      | <b>vCCGGAAGnGCR</b>        | 19.8 | <b>SCGGAAGY</b>   | AFP1            | <b>GTGYARTTAAT</b>        | 3.3  | -                     |
| STAT1     | <b>CAnTTCCS</b>            | 17.9 | <b>CATTTCCK</b>   | TCF-1(P)        | <b>GKCRGKTT</b>           | 3.2  | -                     |
| CAC-BP    | <b>GRGGSTGGG</b>           | 15.0 | <b>GGGTGG</b>     | HNF-4           | <b>TGAMCTTGMCCYT</b>      | 3.1  | <b>TGAMCTTT</b>       |
| AP-4      | <b>GCACTGnY</b>            | 14.9 | <b>CAGCTG</b>     | STAT            | <b>TCCMAGAA</b>           | 3.0  | <b>TCCCRGAAR</b>      |
| SRY       | <b>KTWGTTT</b>             | 14.6 | <b>TTGTTT</b>     | IRF1            | <b>AAGTGAA</b>            | 2.8  | <b>AAGTGAA</b>        |
| TBP       | <b>TATAAATW</b>            | 14.2 | <b>TATAAA</b>     | E4F1            | <b>GTGACGTARS</b>         | 2.7  | <b>GTGACGY</b>        |
| FOXO1     | <b>RWAAACAA</b>            | 14.1 | <b>RTAAACA</b>    | NF-AT           | <b>WGGAAAnW</b>           | 2.6  | <b>TGGAAA</b>         |
| TFII-I    | <b>RGAGGKAGG</b>           | 13.9 | <b>GnGGGAGG</b>   | CDC5            | <b>GATTTAACATAA</b>       | 2.6  | -                     |
| PEA3      | <b>MGAWGT</b>              | 13.6 | <b>SMGGAAGT</b>   | AML1            | <b>ACCACA</b>             | 2.6  | <b>RACCACAR</b>       |
| SF-1      | <b>TGRCCTTG</b>            | 12.6 | <b>TGACCTTG</b>   | IPF1            | <b>KGTCATTAnndC</b>       | 2.5  | <b>TCATTAnY</b>       |
| SOX-5     | <b>ATTGTT</b>              | 12.5 | <b>YYATTGTT</b>   | FAC1            | <b>TnYGTGTTKGT</b>        | 2.5  | <b>TGTTGTK</b>        |
| SREBP-1   | <b>ATCACGTGAY</b>          | 12.4 | <b>TCACGTG</b>    | AHR             | <b>TnGGCTG</b>            | 2.5  | -                     |
| OCTAMER   | <b>ATGCAAATnA</b>          | 12.2 | <b>YATGYAAAT</b>  | C/EBPBETA       | <b>KnTTGCnYAAAY</b>       | 2.3  | <b>TTGCWCAAY</b>      |
| P65       | <b>GGGRATTTCC</b>          | 11.9 | <b>GGGnnTTTCC</b> | AP-2ALPHA       | <b>SCYnnnGGC</b>          | 2.3  | -                     |
| ATF6      | <b>TGACGTGG</b>            | 11.7 | <b>TGACGTGK</b>   | ER              | <b>RnnnTGACCT</b>         | 2.1  | <b>TGACCT</b>         |
| E4BP4     | <b>RTTACRTAAAY</b>         | 11.0 | <b>TTAYRTAA</b>   | CR1             | <b>SCGATCGAT</b>          | 1.9  | <b>RATCRATA</b>       |
| SRF       | <b>GnCCAWATAWGGM</b>       | 10.7 | <b>CCAWWnAAGG</b> | DBP             | <b>GTdTGCT</b>            | 1.8  | <b>YGTnTGCTY</b>      |
| MEF-2     | <b>YTAAWATAGCY</b>         | 10.7 | <b>YTAAWATAG</b>  | HSF             | <b>TTCCMGARGYTTC</b>      | 1.7  | <b>TTCCnRGnnnTTC</b>  |
| POU3F2    | <b>ATTARCATAA</b>          | 10.5 | <b>ATTARCAT</b>   | TEF             | <b>TTATRTWAACAT</b>       | 1.5  | -                     |
| ELF-1     | <b>RnWMBAGGAART</b>        | 9.5  | <b>RGAGGAARY</b>  | PAX-4           | <b>AAWAATTAnS</b>         | 1.4  | <b>TAATTA</b>         |
| BACH2     | <b>SRTGAGTCAnC</b>         | 9.3  | <b>TGAGTCA</b>    | HNF-6           | <b>hWAAATCAATAW</b>       | 1.4  | -                     |
| MEIS1     | <b>TGACAG</b>              | 9.2  | <b>TGACAG</b>     | CDX-2           | <b>GGYMATAAAAnTnT</b>     | 1.4  | -                     |
| E2F       | <b>GCGCSAAA</b>            | 9.2  | <b>SGCSSAAA</b>   | NKX2-5          | <b>TYAAGTG</b>            | 1.3  | -                     |
| ETS       | <b>AnnCACTTCTG</b>         | 9.0  | <b>RYTTCCTG</b>   | TCF11           | <b>WnnATGAC</b>           | 1.2  | <b>ATGACA</b>         |
| RFX1      | <b>GTRCYWnGnYnAC</b>       | 8.7  | -                 | HIF-1           | <b>CCGCACGTMnnC</b>       | 1.1  | -                     |
| RORALPHA2 | <b>TGACCTAnWTW</b>         | 8.6  | <b>TGACCTAnW</b>  | OLF-1           | <b>CMnYTCYCTRGGGAvThG</b> | 0.9  | <b>CCnGGGAR</b>       |
| PU.1      | <b>WGAGGAAG</b>            | 8.4  | <b>GAGGAAGY</b>   | NKX6-1          | <b>TWTTTAATTGGTT</b>      | 0.9  | <b>TTAATTG</b>        |
| EGR       | <b>GTGGSGCRRS</b>          | 8.4  | <b>GTGGGCGnR</b>  | AREB6           | <b>AbWCAGGTnR</b>         | 0.9  | <b>CAGGTA</b>         |
| NRSF      | <b>TTCAGCACCGGACAGMGCC</b> | 8.3  | -                 | IRF-7           | <b>AnTTTCGnWTTCSnA</b>    | 0.8  | <b>STTTCRnTTT</b>     |
| NF-E2     | <b>RTGACTCAGCA</b>         | 7.8  | <b>TGASTMAGC</b>  | IRF-1           | <b>GGTTTCRCITTTTS</b>     | 0.8  | <b>STTTCRnTTT</b>     |
| LEF1      | <b>CTTTGA</b>              | 7.6  | <b>CTTTGA</b>     | HP1             | <b>CTGTTGAAWATT</b>       | 0.8  | -                     |
| HNF-3     | <b>TRTTTRYTYW</b>          | 7.6  | <b>TGTTTGY</b>    | FREAC-3         | <b>TGTTTATTAC</b>         | 0.8  | <b>TRTTTACT</b>       |
| ALPHA-CP1 | <b>CAGCCAATGAG</b>         | 7.1  | <b>YYAATGAG</b>   | RREB-1          | <b>GGGGKGGTTTGGGG</b>     | 0.6  | -                     |
| STATX     | <b>TTMCGGAA</b>            | 6.8  | <b>TTCYnRGAA</b>  | CHOP-C/EBPALPHA | <b>RTGCAATMCCC</b>        | 0.5  | -                     |
| RP58      | <b>TCCAGATGTT</b>          | 6.4  | <b>CRGATGTT</b>   | CRX             | <b>KGRGATTAnnnR</b>       | 0.3  | <b>GGATTA</b>         |
| TEF-1     | <b>GRRATG</b>              | 6.3  | <b>WGGAATGY</b>   | AMEF-2          | <b>KKRGTATTTTTARhCMG</b>  | 0.3  | <b>YTATTTWTAA</b>     |
| NKX2-5    | <b>CWTAATTG</b>            | 6.1  | <b>TTAATTG</b>    | PITX2           | <b>YTGGAATTAnW</b>        | 0.2  | <b>GGATTA</b>         |
| CHX10     | <b>GCTAATTA</b>            | 5.9  | <b>CTAATTW</b>    | NCX             | <b>GTAAKTnG</b>           | 0.1  | <b>GTAATT</b>         |
| TCF-4     | <b>WTCAAAGS</b>            | 5.8  | <b>WTCAAAG</b>    | PTF1-BETA       | <b>SCTGWvvtKTTTCYC</b>    | 0.0  | -                     |
| STAT5A    | <b>AWTTTC</b>              | 5.7  | <b>MATTTCC</b>    | T3R             | <b>MnTGWCTT</b>           | -0.4 | <b>TGACCTY</b>        |
| IY        | <b>AWTTTCC</b>             | 5.5  | <b>MATTTCC</b>    | SMAD-3          | <b>TGTCTGTCT</b>          | -0.4 | -                     |
| NKX6-2    | <b>WAdTAAWTA</b>           | 5.4  | <b>TAATTA</b>     | NF-1            | <b>TGGnnnnnnGCCAA</b>     | -0.5 | <b>TGGnnnnnnKCCAR</b> |
| ATF-1     | <b>TGACGTcARRG</b>         | 5.3  | <b>TGACGTCA</b>   | CP2/LBP-1C/LSF  | <b>GCTGgnTnGnnCYnG</b>    | -0.5 | -                     |
| POU1F1    | <b>ATGAATAAWT</b>          | 5.2  | <b>ATGAATRR</b>   | PAX             | <b>GTKAGTCCAG</b>         | -0.7 | -                     |
| PBX-1     | <b>WTGATTGnT</b>           | 5.0  | <b>TGATTGRY</b>   | ZID             | <b>GGCTCYATCAVC</b>       | -0.8 | -                     |
| LHX3      | <b>TTAATTAATT</b>          | 5.0  | <b>YTAATTA</b>    | MTF-1           | <b>TbTGCAChCGGCC</b>      | -0.8 | -                     |
| ICSBP     | <b>CAGTTTCAYTTY</b>        | 5.0  | <b>STTTCRnTTT</b> | IK-1            | <b>GGYATTTCCcAnd</b>      | -1.2 | <b>TTTCCAnR</b>       |
| FOX       | <b>WAAAYAAACAATM</b>       | 5.0  | <b>AAGYAAACA</b>  | LYF-1           | <b>YCTCCAAA</b>           | -2.5 | -                     |
| HOXA4     | <b>CYAATTWT</b>            | 4.8  | <b>CTAATTW</b>    | P300            | <b>GGGAGTnnnS</b>         | -4.8 | -                     |
| CDP       | <b>RnTAATCGATnW</b>        | 4.8  | <b>RATCRATA</b>   |                 |                           |      |                       |



Supplementary Table S2 **Discovered motifs in human promoters**

| No. | Discovered motif  | MCS   | Known factor | Conservation in promoters | Conservation in introns | Maximum Tissue enrichment score | Position bias |
|-----|-------------------|-------|--------------|---------------------------|-------------------------|---------------------------------|---------------|
| 1   | RCGCAnGCGY        | 107.8 | NRF-1        | 0.49                      | 0.09                    | 15.0                            | -62           |
| 2   | CACGTG            | 85.3  | MYC          | 0.47                      | 0.01                    | 8.8                             | -62           |
| 3   | SCGGAAGY          | 80.4  | ELK-1        | 0.44                      | 0.02                    | 22.4                            | -24           |
| 4   | ACTAYRnnnCCCR     | 69.5  | -            | 0.61                      | 0.06                    | 8.1                             | -89           |
| 5   | GATTGGY           | 64.6  | NF-Y         | 0.51                      | 0.04                    | 9.8                             | -63           |
| 6   | GGGCGGR           | 63.9  | SP1          | 0.21                      | 0.02                    | 11.4                            | -63           |
| 7   | TGAnTCA           | 62.8  | AP-1         | 0.38                      | 0.08                    | 6.5                             | -             |
| 8   | TMTCCGCGAnR       | 55.7  | -            | 0.64                      | 0.08                    | 9.4                             | -62           |
| 9   | TGAYRTCA          | 55.7  | ATF3         | 0.50                      | 0.07                    | 6.1                             | -66           |
| 10  | GCCATnTTG         | 54.7  | YY1          | 0.72                      | 0.03                    | 12.2                            | -             |
| 11  | MGGAAAGTG         | 51.6  | GABP         | 0.43                      | 0.02                    | 13.9                            | -23           |
| 12  | CAGGTG            | 47.6  | E12          | 0.26                      | 0.06                    | 9.9                             | -             |
| 13  | CTTTGT            | 46.0  | LEF1         | 0.42                      | 0.05                    | 13.6                            | -             |
| 14  | TGACGTCA          | 44.8  | ATF3         | 0.44                      | 0.07                    | 4.2                             | -22           |
| 15  | CAGCTG            | 43.9  | AP-4         | 0.27                      | 0.08                    | 8.9                             | -             |
| 16  | RYTTCCTG          | 43.0  | C-ETS-2      | 0.32                      | 0.06                    | 7.4                             | -24           |
| 17  | AACTTT            | 42.1  | IRF1(*)      | 0.43                      | 0.04                    | 11.1                            | -             |
| 18  | TCAnnTGAY         | 40.4  | SREBP-1      | 0.47                      | 0.04                    | 4.9                             | -64           |
| 19  | GKCGCnnnnnnnTGAYG | 40.1  | -            | 0.35                      | 0.00                    | 5.6                             | -62           |
| 20  | GTGACGY           | 38.4  | E4F1         | 0.34                      | 0.02                    | 6.6                             | -56           |
| 21  | GGAAAnCGGAAAnY    | 37.7  | -            | 0.68                      | 0.00                    | 7.0                             | -33           |
| 22  | TGCCAnK           | 37.4  | -            | 0.24                      | 0.02                    | 8.2                             | -17           |
| 23  | TAATTA            | 37.3  | CHX10        | 0.29                      | 0.13                    | 7.1                             | -             |
| 24  | GGGAGGRR          | 33.5  | MAZ          | 0.16                      | 0.03                    | 9.4                             | -             |
| 25  | TGACCTY           | 33.4  | ESRRA        | 0.30                      | 0.07                    | 7.7                             | -             |
| 26  | TTAYRTAA          | 32.6  | E4BP4        | 0.34                      | 0.05                    | 6.1                             | -             |
| 27  | TGGnnnnnKCCAR     | 32.3  | -            | 0.27                      | 0.07                    | 4.5                             | -             |
| 28  | CTAWWWATA         | 32.3  | RSRFC4       | 0.36                      | 0.05                    | 7.6                             | -             |
| 29  | CTTTAAR           | 30.8  | -            | 0.43                      | 0.05                    | 5.4                             | -             |
| 30  | YGCGYRCGC         | 30.5  | -            | 0.19                      | 0.00                    | 5.2                             | -31           |
| 31  | GGGYGTGnY         | 30.0  | -            | 0.24                      | 0.04                    | 5.4                             | -63           |
| 32  | TGASTMAGC         | 27.2  | NF-E2        | 0.39                      | 0.07                    | 5.4                             | -66           |
| 33  | YTATTTnR          | 26.4  | MEF-2        | 0.21                      | 0.05                    | 7.1                             | -             |
| 34  | CYTAGCAAY         | 26.1  | -            | 0.50                      | 0.06                    | 5.2                             | -142          |
| 35  | GCAAnCTGnY        | 25.7  | MYOD         | 0.25                      | 0.06                    | 8.2                             | -             |
| 36  | RTAAACA           | 25.6  | FREAC-2      | 0.46                      | 0.07                    | 7.0                             | -             |
| 37  | GTTRYCATRR        | 25.3  | -            | 0.54                      | 0.11                    | 7.6                             | -56           |
| 38  | TGACCTTG          | 25.2  | ERRALPHA     | 0.37                      | 0.06                    | 8.1                             | -             |
| 39  | TCCCRnnRTGC       | 24.3  | -            | 0.30                      | 0.03                    | 6.8                             | -60           |
| 40  | TTCYnRGAA         | 24.3  | STAT5A       | 0.19                      | 0.05                    | -                               | -             |
| 41  | TGACAGnY          | 24.1  | MEIS1        | 0.27                      | 0.07                    | 6.9                             | -             |
| 42  | TGACATY           | 23.8  | -            | 0.23                      | 0.06                    | 5.8                             | -             |
| 43  | GTTGnYnnRGnAAC    | 23.7  | -            | 0.47                      | 0.13                    | 4.7                             | -57           |
| 44  | YATGnWAAT         | 23.5  | OCT-X        | 0.53                      | 0.06                    | 6.9                             | -             |
| 45  | CCAnnAGRKGGC      | 23.4  | -            | 0.47                      | 0.20                    | -                               | -101          |
| 46  | WTTGKCTG          | 23.0  | -            | 0.25                      | 0.04                    | 5.0                             | -63           |
| 47  | TGCCAAR           | 22.9  | NF-1         | 0.25                      | 0.08                    | 7.0                             | -             |
| 48  | GCnnAnTTCC        | 22.8  | C-REL(*)     | 0.30                      | 0.00                    | 6.0                             | -12           |
| 49  | CATTGYY           | 22.5  | SOX-9        | 0.43                      | 0.04                    | 5.8                             | -             |
| 50  | RGAGGAARY         | 22.4  | PU.1         | 0.22                      | 0.04                    | 4.0                             | -             |
| 51  | TATAAA            | 22.1  | TATA         | 0.47                      | 0.05                    | 8.6                             | -23           |
| 52  | YCATTCAWW         | 21.6  | POU1F1(*)    | 0.61                      | 0.03                    | 5.8                             | -             |
| 53  | RYTGCnnRGnAAC     | 21.3  | MIF-1        | 0.33                      | 0.13                    | -                               | -             |
| 54  | TAAWWATAG         | 21.1  | RSRFC4       | 0.31                      | 0.05                    | 4.5                             | -             |
| 55  | TGGAAA            | 21.1  | NF-AT        | 0.18                      | 0.05                    | 8.8                             | -             |
| 56  | GGGTGGRR          | 20.9  | PAX-4        | 0.20                      | 0.03                    | 7.5                             | -             |
| 57  | ACCTGTTG          | 20.7  | -            | 0.38                      | 0.03                    | 4.1                             | -             |
| 58  | YCATTAA           | 20.3  | IPF1(*)      | 0.24                      | 0.08                    | 6.2                             | -             |
| 59  | WCTCnATGGY        | 19.9  | -            | 0.41                      | 0.02                    | -                               | -66           |
| 60  | TTGTTT            | 19.8  | FOXO4        | 0.27                      | 0.06                    | 9.6                             | -             |
| 61  | YTAATTA           | 19.8  | LHX3         | 0.28                      | 0.13                    | 4.1                             | -             |
| 62  | SMTTTTGT          | 19.1  | -            | 0.37                      | 0.03                    | 8.0                             | -             |
| 63  | AAGWWRnYGGC       | 19.1  | -            | 0.38                      | 0.02                    | 5.4                             | -             |
| 64  | TTAnTCA           | 18.8  | AP-1(*)      | 0.20                      | 0.06                    | 7.0                             | -             |
| 65  | ARGGGTTAA         | 18.7  | FXR(*)       | 0.41                      | 0.10                    | 4.1                             | -104          |
| 66  | RACTnnRTTTnC      | 18.5  | -            | 0.36                      | 0.03                    | -                               | -67           |
| 67  | TGAnnYRGCA        | 17.5  | TCF11/MAFG   | 0.24                      | 0.04                    | 5.3                             | -             |
| 68  | RGAAAnnTTC        | 17.4  | HSF1         | 0.18                      | 0.04                    | 5.6                             | -             |
| 69  | SGCGSSAAA         | 17.3  | E2F-1/DP-2   | 0.24                      | 0.01                    | 9.1                             | -21           |
| 70  | CGTSACG           | 17.2  | PAX-3        | 0.18                      | 0.04                    | -                               | -25           |
| 71  | SYATTGTG          | 17.1  | -            | 0.40                      | 0.03                    | 4.2                             | -             |
| 72  | TCYRGAA           | 17.1  | -            | 0.20                      | 0.05                    | -                               | -             |
| 73  | CTTTGA            | 17.0  | LEF1         | 0.19                      | 0.07                    | 6.4                             | -             |
| 74  | GGAMTnnnnnTCCY    | 16.7  | -            | 0.21                      | 0.01                    | 4.0                             | -104          |
| 75  | TnCATnTCCYR       | 16.5  | STAT1(*)     | 0.35                      | 0.03                    | -                               | -62           |
| 76  | CAGGTA            | 16.3  | AREB6        | 0.22                      | 0.05                    | 6.3                             | -             |
| 77  | AAAYRnCTG         | 16.3  | -            | 0.18                      | 0.04                    | 5.2                             | -             |
| 78  | GCTnWTTGK         | 16.2  | -            | 0.24                      | 0.03                    | -                               | -104          |
| 79  | WGGAATGY          | 16.1  | TEF-1        | 0.21                      | 0.05                    | 6.5                             | -             |
| 80  | SnACAnnnYSYAGA    | 15.8  | -            | 0.31                      | 0.02                    | -                               | -68           |
| 81  | CGGAARnGGChG      | 15.7  | -            | 0.24                      | 0.07                    | 5.3                             | -25           |
| 82  | CTGYnnCTYTAA      | 15.5  | -            | 0.41                      | 0.04                    | -                               | -120          |
| 83  | TGTTTTGY          | 15.1  | HNF-3        | 0.19                      | 0.05                    | 6.6                             | -             |
| 84  | RGTTAMWnATT       | 15.0  | HNF-1        | 0.31                      | 0.03                    | 5.3                             | -             |
| 85  | STTTCRnTTT        | 14.9  | IRF          | 0.24                      | 0.03                    | 4.7                             | -             |
| 86  | GGnnTTTCC         | 14.9  | NF-KAPPAB    | 0.21                      | 0.02                    | -                               | -             |

Supplementary Table S2 **Discovered motifs in human promoters**

|     |                  |      |           |      |      |      |      |
|-----|------------------|------|-----------|------|------|------|------|
| 87  | RYTGCnWTGGnR     | 14.6 | -         | 0.26 | 0.06 | 5.6  | -    |
| 88  | GGCnKCCATnK      | 14.3 | -         | 0.30 | 0.03 | 5.9  | -    |
| 89  | GTTnYnnGGTnA     | 14.3 | -         | 0.26 | 0.06 | -    | -    |
| 90  | YAATnRnnYnATT    | 14.3 | CART-1(*) | 0.22 | 0.05 | -    | -    |
| 91  | GTGGGTGK         | 14.1 | -         | 0.20 | 0.03 | 5.9  | -    |
| 92  | TGCTGAY          | 14.0 | -         | 0.21 | 0.05 | 5.9  | -    |
| 93  | GGATTA           | 14.0 | PITX2     | 0.22 | 0.05 | 6.7  | -    |
| 94  | TGATTTTRY        | 13.9 | GFI-1     | 0.19 | 0.08 | 5.6  | -    |
| 95  | GCCnnnWTAAR      | 13.7 | -         | 0.29 | 0.04 | -    | -69  |
| 96  | YGCAnTGCR        | 13.7 | -         | 0.18 | 0.02 | 8.5  | -    |
| 97  | YATTnATC         | 13.7 | CDP(*)    | 0.19 | 0.05 | 6.5  | -    |
| 98  | GTCnYYATGR       | 13.6 | -         | 0.31 | 0.03 | -    | -    |
| 99  | ATCMnTCCGY       | 13.3 | -         | 0.42 | 0.01 | -    | -275 |
| 100 | CRGAARnnnnCGA    | 13.3 | -         | 0.23 | 0.00 | -    | -    |
| 101 | CTGCAGY          | 13.2 | -         | 0.18 | 0.03 | 11.6 | -    |
| 102 | ATGGYGGA         | 13.2 | -         | 0.29 | 0.02 | 4.1  | -    |
| 103 | ACAWnRnSRCGG     | 13.1 | -         | 0.29 | 0.00 | 5.0  | -    |
| 104 | CCAATnnSnnnGCG   | 13.0 | -         | 0.23 | 0.00 | -    | -87  |
| 105 | ACTWsnACTnY      | 13.0 | -         | 0.25 | 0.01 | -    | -66  |
| 106 | CCGnMnnTnACG     | 12.9 | -         | 0.19 | 0.00 | 5.1  | -48  |
| 107 | RTTnnnYTGGM      | 12.8 | -         | 0.18 | 0.06 | 4.3  | -    |
| 108 | AACWWCAAnK       | 12.7 | FAC1(*)   | 0.35 | 0.03 | -    | -105 |
| 109 | YGTCTTGR         | 12.7 | -         | 0.26 | 0.04 | 4.7  | -    |
| 110 | MCAATnnnnnGCG    | 12.5 | -         | 0.21 | 0.00 | 4.6  | -62  |
| 111 | RACCACAR         | 12.3 | AML       | 0.21 | 0.04 | -    | -    |
| 112 | KTGGYRSGAA       | 12.3 | -         | 0.26 | 0.02 | 5.1  | -    |
| 113 | AACynnnnTTCCS    | 12.3 | -         | 0.24 | 0.01 | -    | -53  |
| 114 | YTCCCRnnAGGY     | 12.2 | -         | 0.17 | 0.03 | -    | -63  |
| 115 | YRTCAAnnRCGC     | 12.2 | -         | 0.20 | 0.02 | -    | -36  |
| 116 | KMCATnnWGGA      | 12.2 | -         | 0.33 | 0.02 | -    | -    |
| 117 | TGTynnnnRGCARM   | 12.1 | -         | 0.19 | 0.03 | -    | -    |
| 118 | GGCnRnWCTTYS     | 12.0 | -         | 0.17 | 0.02 | -    | -21  |
| 119 | GGGnRMnnYCAT     | 11.9 | -         | 0.19 | 0.02 | -    | -    |
| 120 | KRCTCnnnnMAnAGC  | 11.8 | -         | 0.28 | 0.01 | 4.7  | -    |
| 121 | CCAWWnAAGG       | 11.7 | SRF       | 0.25 | 0.03 | 4.4  | -    |
| 122 | RnTCAnnRnnYnATTW | 11.7 | -         | 0.21 | 0.04 | -    | -    |
| 123 | GGCnnMSMYnTTG    | 11.6 | -         | 0.21 | 0.01 | 5.1  | -30  |
| 124 | CCAWYnnGAAR      | 11.5 | -         | 0.22 | 0.04 | -    | -103 |
| 125 | RAAGnYnnCTTY     | 11.5 | -         | 0.17 | 0.03 | -    | -    |
| 126 | WYAAAnnRnnnGCG   | 11.4 | -         | 0.26 | 0.02 | -    | -    |
| 127 | WWTAAAGC         | 11.3 | -         | 0.26 | 0.02 | -    | -    |
| 128 | RYCACnnRnnRnCAG  | 11.3 | -         | 0.23 | 0.06 | -    | -    |
| 129 | RRAGTTGT         | 11.2 | -         | 0.20 | 0.02 | 5.6  | -    |
| 130 | CCCnnGGGAR       | 11.2 | OLF-1     | 0.18 | 0.03 | 5.2  | -    |
| 131 | GATAAGR          | 11.2 | GATA-X    | 0.18 | 0.04 | 5.8  | -    |
| 132 | TCCATTKW         | 11.1 | -         | 0.27 | 0.02 | 4.9  | -    |
| 133 | RYTAAWnnnTGAY    | 11.1 | -         | 0.24 | 0.03 | -    | -    |
| 134 | CATTRAGC         | 11.1 | -         | 0.26 | 0.03 | -    | -    |
| 135 | AGCYRWTTT        | 11.1 | -         | 0.19 | 0.04 | -    | -    |
| 136 | TAAYnRnnTCC      | 11.0 | -         | 0.21 | 0.05 | -    | -    |
| 137 | GAAnYnYGACnY     | 11.0 | -         | 0.22 | 0.02 | -    | -    |
| 138 | MYAATnnnnnnnGGC  | 11.0 | -         | 0.19 | 0.03 | -    | -66  |
| 139 | AAAYWAACM        | 11.0 | HFH-4     | 0.34 | 0.05 | 5.6  | -    |
| 140 | RnGTGGGC         | 10.9 | -         | 0.19 | 0.03 | 7.1  | -    |
| 141 | TTChRnGnnnTTC    | 10.9 | HSF       | 0.19 | 0.03 | -    | -    |
| 142 | ACAWYAAAG        | 10.9 | -         | 0.27 | 0.03 | -    | -    |
| 143 | CAGnWMCnnnGAC    | 10.8 | -         | 0.24 | 0.02 | 6.7  | -    |
| 144 | AAAnWWTGC        | 10.8 | -         | 0.28 | 0.03 | 5.4  | -    |
| 145 | YKACATTT         | 10.7 | -         | 0.32 | 0.04 | -    | -    |
| 146 | RRCCGTTA         | 10.5 | -         | 0.30 | 0.02 | 5.1  | -    |
| 147 | YAATnAnRnnnCAG   | 10.5 | -         | 0.24 | 0.04 | -    | -    |
| 148 | GATGMRGCG        | 10.5 | -         | 0.27 | 0.07 | 4.2  | -    |
| 149 | YGACnnYACAR      | 10.4 | -         | 0.26 | 0.02 | -    | -68  |
| 150 | YTTCCnnnGGAMR    | 10.4 | -         | 0.22 | 0.04 | -    | -    |
| 151 | RYAAAKnnnnnTTGW  | 10.4 | -         | 0.17 | 0.03 | -    | -    |
| 152 | WCAAnnnYCAG      | 10.3 | -         | 0.22 | 0.02 | -    | -    |
| 153 | CTGRYYnATT       | 10.3 | -         | 0.21 | 0.03 | 4.3  | -    |
| 154 | RnCTGnYnRnCTGnY  | 10.2 | -         | 0.20 | 0.03 | -    | -    |
| 155 | WGTTnnnnAAA      | 10.2 | -         | 0.21 | 0.03 | 6.8  | -    |
| 156 | YRCCAKnnGnCGC    | 10.2 | -         | 0.19 | 0.10 | -    | -65  |
| 157 | KCCGnSWTTT       | 10.2 | -         | 0.22 | 0.02 | 6.8  | -    |
| 158 | CCnnnnnnAAGWT    | 10.2 | -         | 0.22 | 0.02 | -    | -    |
| 159 | GGCKCATGS        | 9.9  | -         | 0.18 | 0.01 | -    | -21  |
| 160 | CAGnYGKnAAA      | 9.9  | -         | 0.20 | 0.03 | -    | -    |
| 161 | TTAnWnAnTGGM     | 9.8  | -         | 0.18 | 0.03 | -    | -    |
| 162 | TAAnnYSGCG       | 9.8  | -         | 0.21 | 0.04 | 4.3  | -    |
| 163 | GGARnTKYCCA      | 9.8  | -         | 0.23 | 0.03 | -    | -    |
| 164 | GCGSCMnTTT       | 9.8  | -         | 0.22 | 0.01 | 5.2  | -18  |
| 165 | CCAWnWWnnnGGC    | 9.8  | -         | 0.21 | 0.01 | 4.2  | -    |
| 166 | YnTTnnnAnGCARM   | 9.6  | -         | 0.22 | 0.03 | 5.0  | -    |
| 167 | CCTnTMAGA        | 9.6  | -         | 0.21 | 0.02 | -    | -    |
| 168 | YTAAYnGCT        | 9.5  | -         | 0.18 | 0.06 | -    | -    |
| 169 | TTTnnAnAGCYR     | 9.5  | -         | 0.18 | 0.04 | -    | -    |
| 170 | YnGTTnnnATT      | 9.1  | -         | 0.20 | 0.04 | 6.6  | -    |
| 171 | CTCnAnGTGnY      | 9.1  | -         | 0.23 | 0.02 | -    | -    |
| 172 | TTGCWCAAY        | 9.0  | C/EBPBETA | 0.23 | 0.01 | -    | -    |
| 173 | YWATTWnnRGCT     | 8.8  | -         | 0.18 | 0.04 | -    | -    |
| 174 | WTGAAAT          | 8.1  | -         | 0.22 | 0.05 | 5.1  | -    |

Supplementary Table S3 Motifs discovered in promoters in clusters

| Motif          | Conserved num | Total num | Conservation rate | MCS   | Known factor     |
|----------------|---------------|-----------|-------------------|-------|------------------|
| >cluster_1     |               |           |                   |       |                  |
| RCGCANGCGY     | 1013          | 2117      | 0.48              | 107.8 | V\$NRF1_Q6       |
| RNGCATGCNY     | 506           | 1304      | 0.39              | 53.3  | -                |
| CGCNTGYGCANT   | 73            | 263       | 0.28              | 21.8  | V\$NRF1_Q6       |
| RCGCANNCKCAG   | 86            | 464       | 0.19              | 21.4  | -                |
| GNGCANGYNCAGY  | 60            | 311       | 0.19              | 17.8  | -                |
| SAGCATGY       | 99            | 409       | 0.24              | 15    | -                |
| RNGCANSNKMAGT  | 54            | 286       | 0.19              | 14.6  | -                |
| CATGNACAGY     | 70            | 266       | 0.26              | 14.3  | -                |
| GCGCANRRTC     | 59            | 349       | 0.17              | 11.9  | -                |
| MGCATGTR       | 52            | 212       | 0.25              | 11.4  | -                |
| >cluster_2     |               |           |                   |       |                  |
| CACGTG         | 1588          | 3378      | 0.47              | 85.3  | V\$MYC_Q2        |
| TCACGTG        | 459           | 954       | 0.48              | 47.8  | V\$USF_Q6_01     |
| GCCACGTS       | 174           | 634       | 0.27              | 25.7  | -                |
| GCCACGYS       | 340           | 1972      | 0.17              | 23.5  | V\$MYC_MAX_B     |
| AGCASGTG       | 158           | 586       | 0.27              | 17.6  | V\$USF_C         |
| RCGCAYGTG      | 58            | 241       | 0.24              | 13.8  | -                |
| RYTTCMNGTG     | 65            | 321       | 0.20              | 13    | -                |
| >cluster_3     |               |           |                   |       |                  |
| SCGGAAGY       | 1023          | 2566      | 0.40              | 80.4  | V\$ELK1_Q2       |
| CCCGAAGR       | 451           | 1635      | 0.28              | 40.5  | -                |
| SWTCCGGGTC     | 50            | 133       | 0.38              | 25.3  | -                |
| GACMYGGAAR     | 54            | 167       | 0.32              | 21.2  | -                |
| CCGGAARY       | 171           | 482       | 0.35              | 20.9  | V\$ELK1_Q2       |
| ACATMCGG       | 53            | 169       | 0.31              | 16.5  | -                |
| RGTTCCGG       | 145           | 744       | 0.19              | 15.5  | V\$ELK1_Q2       |
| AAGTYCCGS      | 63            | 348       | 0.18              | 13.4  | -                |
| AACWTCCG       | 62            | 287       | 0.22              | 13    | V\$PEA3_Q6       |
| YTCCRKMTGT     | 68            | 303       | 0.22              | 11.5  | -                |
| CRGATGTT       | 93            | 454       | 0.20              | 11.1  | V\$RP58_Q1       |
| YGGTTCCG       | 57            | 316       | 0.18              | 10.9  | -                |
| >cluster_4     |               |           |                   |       |                  |
| ACTAYRNNNCCCR  | 317           | 520       | 0.61              | 69.5  | -                |
| ACTACNNNNCCC   | 384           | 646       | 0.59              | 65    | -                |
| ACTACNNNTCCCR  | 91            | 131       | 0.69              | 38.2  | -                |
| RRACTACA       | 240           | 581       | 0.41              | 33.3  | -                |
| RRACTNCATNT    | 58            | 190       | 0.31              | 15.7  | -                |
| GACKNCATY      | 95            | 415       | 0.23              | 14.8  | -                |
| RAACYRCNNNNCCC | 54            | 193       | 0.28              | 14.1  | -                |
| GGAYTAC        | 98            | 560       | 0.18              | 9.1   | -                |
| >cluster_5     |               |           |                   |       |                  |
| GATTGGY        | 857           | 1740      | 0.49              | 64.6  | V\$NFY_Q6_01     |
| RGCCAATNR      | 593           | 1527      | 0.39              | 50.5  | V\$NFY_Q1        |
| RNCCAATGR      | 385           | 1005      | 0.38              | 42.2  | V\$NFY_Q1        |
| TGATIGRY       | 268           | 822       | 0.33              | 23.3  | V\$PBX1_Q2       |
| YNAITGGT       | 184           | 845       | 0.22              | 16.3  | V\$NFY_Q6_01     |
| TCCAATNA       | 58            | 247       | 0.23              | 12    | -                |
| RCCAATNR       | 77            | 371       | 0.21              | 11.6  | -                |
| CCAATAR        | 113           | 546       | 0.21              | 11.6  | V\$CDP_Q1        |
| YAATTGGNY      | 124           | 611       | 0.20              | 10.5  | -                |
| YGACYAAT       | 89            | 410       | 0.22              | 9.3   | -                |
| >cluster_6     |               |           |                   |       |                  |
| GGGCGGR        | 3067          | 15905     | 0.19              | 63.9  | V\$SP1_Q6        |
| GGGCGG         | 4303          | 24152     | 0.18              | 55.9  | V\$SP1_Q6        |
| RGCGKGGC       | 810           | 4190      | 0.19              | 47.9  | V\$SP1_Q6        |
| GGGNGGG        | 2711          | 11113     | 0.24              | 40.9  | V\$SP1_Q4_01     |
| RGCGGAGY       | 250           | 1601      | 0.16              | 19.5  | -                |
| RGCGGGNY       | 286           | 1131      | 0.25              | 18.8  | V\$SP1_Q6        |
| YAGGKGGCGC     | 76            | 308       | 0.25              | 18.7  | -                |
| RGGTGKGGC      | 190           | 843       | 0.23              | 18.4  | -                |
| GCCMCTCCY      | 193           | 993       | 0.19              | 14.6  | -                |
| AGNGKCGCTS     | 56            | 298       | 0.19              | 13.6  | -                |
| GGGGCGG        | 224           | 1261      | 0.18              | 8.3   | V\$EGR_Q6        |
| >cluster_7     |               |           |                   |       |                  |
| TGANTCA        | 1924          | 5048      | 0.38              | 62.8  | V\$AP1_C         |
| TGAGTCA        | 535           | 1406      | 0.38              | 39.9  | V\$BACH2_Q1      |
| TGCRITCA       | 164           | 616       | 0.27              | 19.9  | -                |
| TGACKCAC       | 66            | 230       | 0.29              | 14.7  | V\$BACH2_Q1      |
| TGANMATC       | 106           | 455       | 0.23              | 14.1  | -                |
| TGTNANTCA      | 236           | 1240      | 0.19              | 13.4  | -                |
| TGANYCAGA      | 150           | 798       | 0.19              | 13.4  | -                |
| TGANTRCAG      | 57            | 234       | 0.24              | 11.7  | -                |
| AATKANTCA      | 160           | 854       | 0.19              | 11.7  | -                |
| WGACNACCY      | 59            | 286       | 0.21              | 10.7  | -                |
| TGCNGCA        | 592           | 3362      | 0.18              | 10.2  | -                |
| TGAYNCAA       | 74            | 344       | 0.22              | 9.5   | -                |
| >cluster_8     |               |           |                   |       |                  |
| TMTCGGANR      | 236           | 368       | 0.64              | 55.7  | -                |
| MTCGGAGA       | 202           | 321       | 0.63              | 49.1  | -                |
| >cluster_9     |               |           |                   |       |                  |
| TGAYRTCA       | 466           | 924       | 0.50              | 55.7  | V\$ATF3_Q6       |
| GTANNAC        | 119           | 615       | 0.19              | 15.4  | -                |
| TGANNMATC      | 62            | 217       | 0.29              | 14.5  | -                |
| YKTCATCA       | 59            | 222       | 0.27              | 13.1  | -                |
| GCTGANNTCA     | 90            | 424       | 0.21              | 12.8  | -                |
| TGAnnTSACA     | 130           | 735       | 0.18              | 12.6  | -                |
| CATKANNTCANY   | 58            | 297       | 0.20              | 12.1  | -                |
| TGATGTMR       | 54            | 172       | 0.31              | 11.4  | -                |
| ATGRNNTCAT     | 102           | 621       | 0.16              | 10.2  | -                |
| >cluster_10    |               |           |                   |       |                  |
| GCCATNTTG      | 316           | 452       | 0.70              | 54.7  | V\$YY1_Q6        |
| ANATGGCG       | 459           | 821       | 0.56              | 50.1  | V\$YY1_Q6        |
| CCAWNWTGG      | 238           | 590       | 0.40              | 31.1  | -                |
| GCCATTKT       | 176           | 345       | 0.51              | 26.8  | V\$YY1_Q6        |
| KCCATTTTRT     | 51            | 80        | 0.64              | 20.3  | -                |
| MAGATGGY       | 283           | 1165      | 0.24              | 18.9  | V\$TAL1BETA47_01 |
| AAANATGGM      | 76            | 211       | 0.36              | 18.9  | V\$YY1_Q6        |
| KCCATNTTA      | 60            | 130       | 0.46              | 17.3  | V\$YY1_Q6        |

|                 |      |      |      |      |                  |
|-----------------|------|------|------|------|------------------|
| RNGGCCATNT      | 69   | 233  | 0.30 | 14.6 | V\$NFMUE1_Q6     |
| TCAMNATGG       | 57   | 179  | 0.32 | 14.2 | -                |
| GGCNYTTTRW      | 74   | 331  | 0.22 | 13.6 | -                |
| GCCYWYGTG       | 80   | 463  | 0.17 | 12.1 | -                |
| CCAWNKTGG       | 69   | 317  | 0.22 | 11.8 | -                |
| GGCNSNNTTAW     | 56   | 319  | 0.18 | 11.6 | -                |
| RNAGCCATNT      | 54   | 201  | 0.27 | 11.4 | V\$YY1_Q6        |
| GGAMNATGSY      | 58   | 264  | 0.22 | 10.9 | -                |
| WNATGRCTG       | 59   | 252  | 0.23 | 10.1 | -                |
| RGAAWTTGGC      | 72   | 339  | 0.21 | 9.9  | -                |
| GGCYMTTWW       | 59   | 297  | 0.20 | 9.9  | -                |
| GGCNATTKK       | 78   | 403  | 0.19 | 9.8  | -                |
| CGGCCATYK       | 51   | 226  | 0.23 | 9.8  | V\$NFMUE1_Q6     |
| GCCMWYKTGC      | 51   | 260  | 0.20 | 9.6  | -                |
| GCCWNATTK       | 58   | 310  | 0.19 | 8.3  | -                |
| >cluster_11     |      |      |      |      |                  |
| MGGAAGTG        | 474  | 1184 | 0.40 | 51.6 | V\$GABP_B        |
| GGAARTGAYR      | 128  | 221  | 0.58 | 39.9 | -                |
| SMGGAAGT        | 430  | 1412 | 0.30 | 34   | V\$ETS_Q4        |
| CATTTCK         | 181  | 913  | 0.20 | 14.6 | V\$STAT1_Q2      |
| RCCACWYCT       | 73   | 331  | 0.22 | 13.6 | -                |
| MGGAARYGAG      | 57   | 192  | 0.30 | 13.4 | -                |
| >cluster_12     |      |      |      |      |                  |
| CAGGTG          | 1151 | 4397 | 0.26 | 47.6 | V\$E12_Q6        |
| CAGNTGG         | 1626 | 6895 | 0.24 | 35.7 | V\$MYOD_Q6       |
| CCANNTGGY       | 540  | 2361 | 0.23 | 25   | -                |
| RYAGTGG         | 326  | 1323 | 0.25 | 24   | V\$E12_Q6        |
| AGTGTA          | 501  | 2336 | 0.21 | 23   | V\$AREB6_Q2      |
| RNCAGNWGGT      | 252  | 1368 | 0.18 | 15.4 | -                |
| YRGGTGGC        | 213  | 1119 | 0.19 | 11.5 | -                |
| RNCAGRKGGCA     | 67   | 339  | 0.20 | 11.4 | -                |
| RTCAMCTT        | 56   | 244  | 0.23 | 10.5 | -                |
| AACMANMTGG      | 63   | 334  | 0.19 | 9.3  | -                |
| CAANNTGAY       | 61   | 320  | 0.19 | 8.6  | -                |
| >cluster_13     |      |      |      |      |                  |
| CTTTGT          | 763  | 1887 | 0.40 | 46   | V\$LEF1_Q2       |
| YTTTGTG         | 358  | 1509 | 0.24 | 20.6 | -                |
| TTTGTG          | 1145 | 6210 | 0.18 | 18.2 | -                |
| YTTTCT          | 362  | 1964 | 0.18 | 16.9 | -                |
| YCTTKRTCT       | 55   | 256  | 0.21 | 10   | -                |
| TTTGT           | 132  | 666  | 0.20 | 7.7  | -                |
| >cluster_14     |      |      |      |      |                  |
| TGACGTCA        | 316  | 712  | 0.44 | 44.8 | V\$ATF3_Q6       |
| TGACGTMR        | 436  | 1008 | 0.43 | 50.7 | V\$CREB_Q1       |
| >cluster_15     |      |      |      |      |                  |
| CAGCTG          | 2468 | 9256 | 0.27 | 43.9 | V\$AP4_Q5        |
| CAGNTGT         | 1286 | 5437 | 0.24 | 31.4 | V\$E47_Q1        |
| CCANNTGT        | 506  | 2401 | 0.21 | 21.6 | -                |
| RACANSTGT       | 254  | 1086 | 0.23 | 20.6 | -                |
| TGAYWNATG       | 213  | 1082 | 0.20 | 16.1 | -                |
| ACASRTGGY       | 61   | 201  | 0.30 | 15.1 | V\$TAL1BETA47_Q1 |
| TGAYWNNTGA      | 191  | 1108 | 0.17 | 14   | -                |
| CCASNTGTG       | 67   | 406  | 0.17 | 10.7 | -                |
| TGACRNNTGT      | 72   | 394  | 0.18 | 9.6  | -                |
| >cluster_16     |      |      |      |      |                  |
| RYTTCCTG        | 807  | 2616 | 0.31 | 43   | V\$ETS2_B        |
| YTTCKGTT        | 135  | 522  | 0.26 | 17.9 | V\$ELK1_Q2       |
| GCCARGAA        | 176  | 1019 | 0.17 | 12   | -                |
| YAATTCCT        | 56   | 318  | 0.18 | 10.2 | V\$HMG1Y_Q6      |
| >cluster_17     |      |      |      |      |                  |
| AACTT           | 617  | 1471 | 0.42 | 42.1 | -                |
| AAGTT           | 1414 | 6480 | 0.22 | 28.2 | -                |
| GAAGTT          | 367  | 1694 | 0.22 | 19.3 | -                |
| GAAGTT          | 784  | 3928 | 0.20 | 16.8 | -                |
| AAAGTG          | 252  | 1546 | 0.16 | 10.8 | -                |
| KNAACTTGRY      | 84   | 486  | 0.17 | 9.3  | -                |
| AAGTGAA         | 53   | 327  | 0.16 | 6.1  | V\$IRF1_Q6       |
| >cluster_18     |      |      |      |      |                  |
| TCANNTGAY       | 317  | 704  | 0.45 | 40.4 | V\$SREBP1_Q1     |
| YCARTGAY        | 112  | 347  | 0.32 | 17.6 | V\$SREBP1_Q1     |
| RTCACATGNY      | 61   | 249  | 0.25 | 12.8 | -                |
| CAGNTGAC        | 208  | 1054 | 0.20 | 12.7 | -                |
| RTCACATK        | 52   | 189  | 0.28 | 9.9  | -                |
| >cluster_19     |      |      |      |      |                  |
| GKCGCNSNNNTGAYG | 50   | 154  | 0.32 | 40.1 | -                |
| RTCATNSNNNGCG   | 53   | 206  | 0.26 | 15.1 | -                |
| YMATCNSNNNGCGM  | 53   | 327  | 0.16 | 12.1 | -                |
| KNCATNSNNNGCGC  | 56   | 345  | 0.16 | 9.9  | -                |
| >cluster_20     |      |      |      |      |                  |
| GTGACGY         | 543  | 1699 | 0.32 | 38.4 | V\$E4F1_Q6       |
| RCGTGATY        | 115  | 389  | 0.30 | 19   | V\$CREB_Q2       |
| RGGTGACNY       | 213  | 957  | 0.22 | 16.3 | V\$AP1F1_Q2      |
| RAGTGACNY       | 122  | 538  | 0.23 | 15.8 | -                |
| TGTGAC          | 256  | 1426 | 0.18 | 13.7 | -                |
| TGAYGTGNY       | 63   | 212  | 0.30 | 12.9 | V\$ATF6_Q1       |
| GCGYATTK        | 62   | 208  | 0.30 | 12.7 | -                |
| GGTNACNTTG      | 54   | 210  | 0.26 | 11.8 | -                |
| GGTGACNT        | 115  | 637  | 0.18 | 11.8 | V\$CREB_Q2       |
| TGACGTGK        | 51   | 188  | 0.27 | 11.4 | V\$ATF6_Q1       |
| ACGTSACT        | 62   | 326  | 0.19 | 11.3 | -                |
| GTGATG          | 184  | 1087 | 0.17 | 8.8  | -                |
| >cluster_21     |      |      |      |      |                  |
| GGAANCGGAANY    | 82   | 140  | 0.59 | 37.7 | -                |
| MGGAANCGGAA     | 87   | 150  | 0.58 | 36.3 | -                |
| >cluster_22     |      |      |      |      |                  |
| TGCGCANK        | 600  | 2481 | 0.24 | 37.4 | -                |
| TGCGCAGGC       | 99   | 450  | 0.22 | 21.7 | -                |
| CMTGCKYAGT      | 53   | 208  | 0.25 | 17.7 | -                |
| >cluster_23     |      |      |      |      |                  |

|                |      |      |      |      |                  |
|----------------|------|------|------|------|------------------|
| TAATTA         | 1614 | 5584 | 0.29 | 37.3 | V\$CHX10_01      |
| TATTTAW        | 137  | 366  | 0.37 | 18.5 | V\$TBP_01        |
| CTAATTW        | 514  | 2537 | 0.20 | 17.7 | V\$CHX10_01      |
| CTAWTTANR      | 55   | 146  | 0.38 | 13.8 | V\$CHX10_01      |
| ATTTAANK       | 84   | 318  | 0.26 | 10.4 | -                |
| ATATTTTR       | 66   | 222  | 0.30 | 10.1 | -                |
| AAAYATT        | 71   | 315  | 0.23 | 9.6  | V\$FOXJ2_02      |
| STGTMATTA      | 57   | 294  | 0.19 | 8.7  | -                |
| GTAATT         | 94   | 470  | 0.20 | 8.3  | V\$NCX_01        |
| >cluster_24    |      |      |      |      |                  |
| GGGAGRR        | 1393 | 8773 | 0.16 | 33.5 | V\$MAZ_Q6        |
| CCCYTCCCC      | 297  | 1102 | 0.27 | 31.2 | -                |
| YYCTCCCY       | 608  | 3350 | 0.18 | 28.6 | V\$MAZ_Q6        |
| GNGGGAGG       | 799  | 4166 | 0.19 | 19.6 | V\$TFIII_Q6      |
| RGAGGAG        | 456  | 2615 | 0.17 | 17.3 | -                |
| GTGGGAGG       | 166  | 917  | 0.18 | 12.1 | -                |
| >cluster_25    |      |      |      |      |                  |
| TGACCTY        | 727  | 2418 | 0.30 | 33.4 | V\$ERR1_Q2       |
| TGACCT         | 1137 | 4121 | 0.28 | 32   | V\$ER_Q6_02      |
| GTGACCY        | 438  | 1900 | 0.23 | 18.7 | V\$ER_Q6_02      |
| TGAMCTTT       | 191  | 909  | 0.21 | 15.2 | V\$COUP_01       |
| YYTTGACCY      | 120  | 605  | 0.20 | 13.4 | -                |
| GAAGGTMR       | 75   | 401  | 0.19 | 12.5 | -                |
| WGAGSTCAY      | 52   | 228  | 0.23 | 12   | -                |
| YTTGAMCTT      | 90   | 450  | 0.20 | 11.9 | V\$GNCF_01       |
| TRACCYNNTTT    | 67   | 365  | 0.18 | 11.4 | -                |
| AGGTNAGT       | 148  | 797  | 0.19 | 11   | -                |
| RGATCAARK      | 94   | 503  | 0.19 | 10.1 | -                |
| GGTRAGT        | 119  | 650  | 0.18 | 10.1 | -                |
| CTGWCCTTNR     | 74   | 411  | 0.18 | 9.4  | V\$T3R_Q6        |
| TGACCTANW      | 66   | 339  | 0.19 | 8.8  | V\$RORA2_01      |
| >cluster_26    |      |      |      |      |                  |
| TTAYRTAA       | 436  | 1288 | 0.34 | 32.6 | V\$E4BP4_01      |
| >cluster_27    |      |      |      |      |                  |
| TGNNNNNNKCCAR  | 421  | 1659 | 0.25 | 32.3 | -                |
| GGNNNNNNKCCAR  | 394  | 1470 | 0.27 | 31.2 | -                |
| YNGCANNNNYCAAR | 97   | 452  | 0.21 | 15.7 | -                |
| TTGRNNNNNTCCAR | 71   | 357  | 0.20 | 13.7 | -                |
| >cluster_28    |      |      |      |      |                  |
| CTAWWWATA      | 351  | 1054 | 0.33 | 32.3 | V\$RSRFC4_Q2     |
| TATNATA        | 112  | 260  | 0.43 | 19.2 | -                |
| >cluster_29    |      |      |      |      |                  |
| CTTTAAR        | 299  | 790  | 0.38 | 30.8 | -                |
| KNCCCTTAA      | 74   | 168  | 0.44 | 23.5 | -                |
| CCCYKKAAG      | 131  | 682  | 0.19 | 16.8 | -                |
| CCCYTTTRW      | 91   | 350  | 0.26 | 14.9 | -                |
| GCCYNTTAA      | 59   | 221  | 0.27 | 13.2 | -                |
| WWTAAAGT       | 54   | 184  | 0.29 | 11   | -                |
| >cluster_30    |      |      |      |      |                  |
| YCGYRCGC       | 431  | 2232 | 0.19 | 30.5 | -                |
| >cluster_31    |      |      |      |      |                  |
| GGYGTGNY       | 349  | 1640 | 0.21 | 30   | -                |
| AGGYGTG        | 324  | 1630 | 0.20 | 13.6 | -                |
| >cluster_32    |      |      |      |      |                  |
| TGASTMAGC      | 139  | 359  | 0.39 | 27.2 | V\$NFE2_01       |
| GCTGWGTCA      | 59   | 125  | 0.47 | 22.8 | V\$NRF2_Q4       |
| GCTRANNCAGS    | 71   | 394  | 0.18 | 9.5  | -                |
| >cluster_33    |      |      |      |      |                  |
| YTATTTNR       | 661  | 3255 | 0.20 | 26.4 | V\$MEF2_02       |
| YTATTTWAA      | 91   | 408  | 0.22 | 14.6 | V\$AMEF2_Q6      |
| TTAITT         | 231  | 1018 | 0.23 | 14.2 | -                |
| TRTTTTGG       | 58   | 210  | 0.28 | 11.5 | -                |
| YRGAATARM      | 91   | 541  | 0.17 | 10.1 | -                |
| CTAWWITARS     | 58   | 301  | 0.19 | 8.9  | -                |
| YTATTTNTGG     | 58   | 306  | 0.19 | 8.5  | -                |
| >cluster_34    |      |      |      |      |                  |
| CYTAGCAAY      | 73   | 165  | 0.44 | 26.1 | -                |
| GTTRCYAGG      | 64   | 211  | 0.30 | 19   | -                |
| GCARCCAWT      | 71   | 285  | 0.25 | 14.9 | -                |
| GCTAAT         | 500  | 2446 | 0.20 | 14.6 | -                |
| RYTGCAAGR      | 68   | 312  | 0.22 | 12.3 | -                |
| MTTAGCAW       | 55   | 199  | 0.28 | 11.9 | -                |
| GGTTGCYA       | 65   | 292  | 0.22 | 11.7 | -                |
| GCTRATGR       | 156  | 920  | 0.17 | 9.5  | -                |
| YRGAACCR       | 66   | 340  | 0.19 | 8.5  | -                |
| >cluster_35    |      |      |      |      |                  |
| GCANCTGNY      | 671  | 2881 | 0.23 | 25.7 | V\$MYOD_Q6       |
| CAGATG         | 1145 | 5153 | 0.22 | 25.1 | V\$TAL1BETA47_01 |
| GCASSTGC       | 418  | 2482 | 0.17 | 23.6 | -                |
| RACANSTGC      | 113  | 600  | 0.19 | 14.9 | V\$E47_01        |
| GCANCWGCT      | 189  | 1005 | 0.19 | 13.1 | -                |
| GCANCANCTG     | 82   | 452  | 0.18 | 9.9  | -                |
| MCAGATGK       | 72   | 391  | 0.18 | 9.8  | V\$TAL1BETA47_01 |
| >cluster_36    |      |      |      |      |                  |
| RTAAACA        | 204  | 481  | 0.42 | 25.6 | V\$FREAC2_01     |
| RTAAATA        | 852  | 3557 | 0.24 | 26.3 | V\$TBP_01        |
| RRGTAAACA      | 94   | 387  | 0.24 | 13.6 | V\$FREAC4_01     |
| TRTTTACT       | 154  | 828  | 0.19 | 11.3 | V\$FREAC3_01     |
| CTCRNRTTC      | 59   | 301  | 0.20 | 10.8 | -                |
| MNGTAANCAGR    | 57   | 280  | 0.20 | 10.4 | -                |
| GTAANYNGAG     | 58   | 297  | 0.20 | 10.3 | -                |
| TCTNITTA       | 57   | 242  | 0.24 | 9.4  | -                |
| TRTTTACCW      | 60   | 310  | 0.19 | 8.8  | V\$FREAC2_01     |
| >cluster_37    |      |      |      |      |                  |
| GTTRYCATRR     | 69   | 142  | 0.49 | 25.3 | -                |
| MYATGRNACC     | 54   | 208  | 0.26 | 13.4 | -                |
| >cluster_38    |      |      |      |      |                  |

|                |     |      |      |      |                |
|----------------|-----|------|------|------|----------------|
| TGACCTTG       | 162 | 434  | 0.37 | 25.2 | V\$SF1_Q6      |
| GTGWMCTT       | 82  | 390  | 0.21 | 12.5 | -              |
| GTGNCMTTG      | 54  | 278  | 0.19 | 11.9 | -              |
| YSACCWTTGG     | 54  | 319  | 0.17 | 10.6 | -              |
| GTGRNYYTGG     | 77  | 478  | 0.16 | 10   | -              |
| >cluster_39    |     |      |      |      |                |
| TCCCRNRTGC     | 138 | 502  | 0.27 | 24.3 | -              |
| TCCCRNCATNC    | 56  | 191  | 0.29 | 16.1 | -              |
| YNCCANNWTGC    | 132 | 645  | 0.20 | 15   | -              |
| SCATNNRGGGA    | 52  | 261  | 0.20 | 9.4  | -              |
| >cluster_40    |     |      |      |      |                |
| TTCYNRGAA      | 468 | 2414 | 0.19 | 24.3 | V\$STAT5B_01   |
| GCGYSGGAAR     | 61  | 370  | 0.16 | 13.3 | -              |
| TCCCRGAAR      | 84  | 499  | 0.17 | 12.5 | V\$STAT_Q6     |
| GCGNCMGGAA     | 53  | 325  | 0.16 | 12.2 | -              |
| KTCCTNGAA      | 136 | 781  | 0.17 | 11.8 | V\$STAT5B_01   |
| YYCTGGGAAA     | 59  | 299  | 0.20 | 11.5 | -              |
| TTYYNNGAANK    | 55  | 259  | 0.21 | 10.7 | V\$STAT5B_01   |
| YNTCTRGGAAW    | 58  | 341  | 0.17 | 10.5 | -              |
| TTYCACRS       | 65  | 415  | 0.16 | 10.5 | -              |
| TKCTGRGAA      | 52  | 311  | 0.17 | 10.4 | -              |
| TTCCCANR       | 79  | 503  | 0.16 | 9.6  | V\$IK1_01      |
| >cluster_41    |     |      |      |      |                |
| TGACAGNY       | 594 | 2363 | 0.25 | 24.1 | V\$MEIS1_01    |
| TGACAG         | 486 | 2007 | 0.24 | 23.8 | V\$MEIS1_01    |
| CTGNCAGNY      | 635 | 3598 | 0.18 | 17.3 | -              |
| GTGACA         | 349 | 1642 | 0.21 | 16.9 | V\$MEIS1_01    |
| KGACAGCTS      | 68  | 355  | 0.19 | 12.8 | V\$TGIF_01     |
| TTGACA         | 160 | 671  | 0.24 | 12.2 | -              |
| CTGACARY       | 211 | 1105 | 0.19 | 12.2 | V\$TGIF_01     |
| ATGACA         | 712 | 3938 | 0.18 | 12.2 | V\$TCF11_01    |
| RNTTGTC        | 90  | 394  | 0.23 | 10.9 | -              |
| TGTCATKK       | 51  | 191  | 0.27 | 9.9  | V\$TCF11_01    |
| RNTGTNAAA      | 72  | 345  | 0.21 | 9    | -              |
| >cluster_42    |     |      |      |      |                |
| TGACATY        | 557 | 2425 | 0.23 | 23.8 | -              |
| RYGATGTCA      | 79  | 185  | 0.43 | 23.9 | -              |
| RATGNCATY      | 238 | 1226 | 0.19 | 16.4 | -              |
| GAAKTCA        | 63  | 280  | 0.23 | 12.6 | -              |
| RATGWCAG       | 235 | 1403 | 0.17 | 11.8 | -              |
| GATRNATC       | 100 | 518  | 0.19 | 11.4 | -              |
| GTGWCATY       | 61  | 236  | 0.26 | 10.9 | -              |
| SCTGMCATNK     | 52  | 245  | 0.21 | 10   | -              |
| >cluster_43    |     |      |      |      |                |
| GTTGNYNRRGNAAC | 69  | 152  | 0.45 | 23.7 | -              |
| GNTGCYNNRKNAC  | 54  | 192  | 0.28 | 22.2 | -              |
| GTTGNYNNNNGAC  | 55  | 244  | 0.23 | 11.8 | -              |
| KTGNYNRRGAANY  | 74  | 399  | 0.19 | 10.7 | -              |
| TTGNYNNNTGAYR  | 68  | 400  | 0.17 | 9.8  | -              |
| >cluster_44    |     |      |      |      |                |
| YATGNWAAT      | 105 | 199  | 0.53 | 23.5 | V\$OCT_C       |
| ATTWSCAT       | 109 | 248  | 0.44 | 20.1 | V\$OCT_C       |
| YATGYAAAT      | 149 | 501  | 0.30 | 19.9 | V\$OCT_Q6      |
| TTTNAAT        | 251 | 879  | 0.29 | 19.7 | -              |
| RTTTGAAY       | 75  | 207  | 0.36 | 16.5 | -              |
| YNATTTGCRW     | 50  | 124  | 0.40 | 15.1 | V\$OCT_B       |
| RTTTNMATG      | 59  | 210  | 0.28 | 12.2 | -              |
| TGTNAATNR      | 75  | 289  | 0.26 | 11.6 | -              |
| TTTNAAC        | 161 | 838  | 0.19 | 11.5 | -              |
| RRATGNNAATTNR  | 50  | 242  | 0.21 | 9.4  | -              |
| YAATTTGY       | 200 | 1213 | 0.16 | 9.2  | -              |
| ATTARCAT       | 103 | 588  | 0.18 | 8    | V\$POU3F2_02   |
| >cluster_45    |     |      |      |      |                |
| CCANNAGRKGGC   | 75  | 185  | 0.41 | 23.4 | -              |
| CACNAKRKGGC    | 54  | 152  | 0.36 | 18.3 | -              |
| CNGCANRKGNGCGC | 50  | 244  | 0.20 | 15.4 | -              |
| CACNWGRGGGY    | 48  | 168  | 0.29 | 14.1 | -              |
| GCCWNYWKG TG   | 54  | 206  | 0.26 | 13.5 | -              |
| GCCNYNNGTGGRY  | 86  | 399  | 0.22 | 13.1 | -              |
| CCASYAGGKG     | 56  | 260  | 0.22 | 12.9 | -              |
| CAGYRSRNGGC    | 57  | 258  | 0.22 | 12.7 | -              |
| CCATYKCT       | 82  | 381  | 0.22 | 11.5 | -              |
| KMCATNNNGTG    | 53  | 222  | 0.24 | 10.5 | -              |
| CCAYCYRCTG     | 53  | 229  | 0.23 | 10.3 | -              |
| >cluster_46    |     |      |      |      |                |
| WTTGKCTG       | 235 | 932  | 0.25 | 23   | -              |
| CAGMSAATG      | 57  | 274  | 0.21 | 13   | -              |
| GATTKSCTG      | 83  | 350  | 0.24 | 12.4 | -              |
| WTTGKYTGG      | 72  | 416  | 0.17 | 10.9 | -              |
| WWTGTCTG       | 56  | 272  | 0.21 | 8.6  | -              |
| >cluster_47    |     |      |      |      |                |
| TGCCAAR        | 652 | 2843 | 0.23 | 22.9 | V\$NF1_Q6      |
| TTGNCAAR       | 464 | 2597 | 0.18 | 15.4 | -              |
| GTGCCAR        | 366 | 2015 | 0.18 | 14.1 | -              |
| >cluster_48    |     |      |      |      |                |
| GCGNNAITTC     | 98  | 350  | 0.28 | 22.8 | -              |
| GCGKNAYITTC    | 62  | 171  | 0.36 | 22.3 | -              |
| RNGGANITTC     | 54  | 183  | 0.30 | 17.3 | V\$CREL_01     |
| RGGANYYCCC     | 251 | 1512 | 0.17 | 12.7 | V\$NFKAPPAB_01 |
| SGGAYTTCYY     | 55  | 270  | 0.20 | 10   | -              |
| >cluster_49    |     |      |      |      |                |
| CATTGTYY       | 119 | 296  | 0.40 | 22.5 | V\$SOX9_B1     |
| YWTTGTTC       | 181 | 439  | 0.41 | 25.5 | V\$SOX9_B1     |
| YYATTGTT       | 103 | 220  | 0.47 | 20   | V\$SOX9_B1     |
| YYATTGTCY      | 63  | 146  | 0.43 | 19.2 | -              |
| CCCWTTGTNY     | 70  | 210  | 0.33 | 14.6 | -              |
| GGCNTTGTNY     | 97  | 521  | 0.19 | 10.1 | -              |
| RNACAAGWAC     | 59  | 298  | 0.20 | 9    | -              |
| >cluster_50    |     |      |      |      |                |
| RGAGGAARY      | 333 | 1612 | 0.21 | 22.4 | V\$PU1_Q6      |

|               |      |       |      |       |                |
|---------------|------|-------|------|-------|----------------|
| GAGGAAGY      | 251  | 1184  | 0.21 | 16.8  | V\$PU1_Q6      |
| RYTTCCTTY     | 287  | 1646  | 0.17 | 14.1  | -              |
| GAGRAAGTK     | 61   | 341   | 0.18 | 10    | -              |
| >cluster_51   |      |       |      |       |                |
| TATAAA        | 209  | 513   | 0.41 | 22.1  | V\$TATA_01     |
| TTNNAAA       | 400  | 1650  | 0.24 | 22.1  | -              |
| AATAAA        | 315  | 1068  | 0.29 | 21.5  | -              |
| YNATTNATA     | 97   | 185   | 0.52 | 19.2  | -              |
| TATATA        | 128  | 290   | 0.44 | 18.7  | V\$TATA_01     |
| YTTGYAAA      | 436  | 2515  | 0.17 | 16.5  | -              |
| TGTAAY        | 547  | 2686  | 0.20 | 16.2  | -              |
| ATAAAA        | 208  | 805   | 0.26 | 15.9  | V\$TATA_C      |
| YNATAAAG      | 103  | 351   | 0.29 | 15.5  | -              |
| YATAWAAG      | 63   | 185   | 0.34 | 14.4  | V\$TATA_01     |
| YTATWAAA      | 62   | 176   | 0.35 | 13.5  | V\$TATA_C      |
| YNCATAAANM    | 51   | 157   | 0.32 | 11.1  | -              |
| TTTRYMAACA    | 65   | 342   | 0.19 | 10.1  | -              |
| >cluster_52   |      |       |      |       |                |
| YYCATTCAWW    | 66   | 122   | 0.54 | 21.6  | -              |
| ATGAATRR      | 110  | 237   | 0.46 | 19.8  | V\$POU1F1_Q6   |
| YYATTYATT     | 68   | 179   | 0.38 | 15.4  | -              |
| TGAYNGACR     | 72   | 273   | 0.26 | 13.1  | -              |
| TGANTGA       | 211  | 1044  | 0.20 | 13.1  | -              |
| CATWMATT      | 54   | 169   | 0.32 | 11.1  | -              |
| ATGRRRTGA     | 52   | 201   | 0.26 | 9.9   | -              |
| CCATNCAT      | 57   | 220   | 0.26 | 9.7   | -              |
| TAATTTATK     | 59   | 325   | 0.18 | 7.8   | V\$POU6F1_01   |
| >cluster_53   |      |       |      |       |                |
| RYTGCNRRGNAAC | 52   | 164   | 0.32 | 21.3  | V\$MIF1_01     |
| GTTNSNNRNCAY  | 55   | 165   | 0.33 | 18.9  | -              |
| GTTNNNNNNAAC  | 110  | 513   | 0.21 | 15.5  | -              |
| TTAnnnKTAACY  | 69   | 296   | 0.23 | 14.1  | -              |
| RTTGYNNNGCA   | 58   | 279   | 0.21 | 12.2  | -              |
| TTAMNNKNRACC  | 58   | 328   | 0.18 | 9.5   | -              |
| >cluster_54   |      |       |      |       |                |
| TAAWWATAG     | 147  | 534   | 0.28 | 21.1  | V\$RSRFC4_Q2   |
| CTANRITMS     | 57   | 157   | 0.36 | 15.4  | -              |
| GCTRNITNTR    | 266  | 1474  | 0.18 | 14.4  | -              |
| TATWWTAAC     | 63   | 261   | 0.24 | 12.6  | -              |
| TAAWAATM      | 53   | 173   | 0.31 | 10.5  | -              |
| AATAAT        | 104  | 401   | 0.26 | 10.1  | V\$CDP_01      |
| >cluster_55   |      |       |      |       |                |
| TGGAAG        | 1659 | 9001  | 0.18 | 21.1  | V\$NFAT_Q4_01  |
| MATTTC        | 218  | 1181  | 0.18 | 13.9  | V\$HMGY_Q6     |
| RGAAACTY      | 296  | 1710  | 0.17 | 13.7  | -              |
| GTTTC         | 930  | 5470  | 0.17 | 12.6  | V\$NFAT_Q4_01  |
| GGAANSTTT     | 64   | 324   | 0.20 | 10.6  | -              |
| RGGAACCTK     | 56   | 342   | 0.16 | 10.2  | -              |
| YNATGGAARC    | 56   | 295   | 0.19 | 9.6   | -              |
| >cluster_56   |      |       |      |       |                |
| GGGTGRR       | 822  | 4394  | 0.19 | 20.9  | V\$PAX4_03     |
| GGGGGGG       | 2362 | 12769 | 0.19 | 59.1  | V\$MAZR_01     |
| GGGGGAGYY     | 143  | 568   | 0.25 | 17.2  | -              |
| GGGTGG        | 1589 | 8365  | 0.19 | 16.5  | V\$PAX4_03     |
| AGCYMCNCCC    | 152  | 783   | 0.19 | 15.6  | -              |
| GGYGNNGTC     | 82   | 402   | 0.20 | 11.7  | -              |
| >cluster_57   |      |       |      |       |                |
| ACCTGTTG      | 99   | 258   | 0.38 | 20.7  | -              |
| YRACAAGT      | 110  | 336   | 0.33 | 22.5  | -              |
| CACNTSYTGC    | 74   | 325   | 0.23 | 15.6  | -              |
| CYTGTTGC      | 79   | 275   | 0.29 | 14.3  | -              |
| ACTTSNTGC     | 62   | 254   | 0.24 | 13.2  | -              |
| CACWWNCTGY    | 55   | 260   | 0.21 | 11.6  | -              |
| CAGRANRTGA    | 93   | 533   | 0.17 | 11    | -              |
| CAAYWRGTG     | 66   | 300   | 0.22 | 11    | -              |
| MACCKGTTT     | 58   | 273   | 0.21 | 10.3  | -              |
| GTCAYNKCC     | 57   | 301   | 0.19 | 9.8   | -              |
| CAAYARATG     | 58   | 315   | 0.18 | 8.8   | -              |
| GCCTGTTKM     | 55   | 304   | 0.18 | 8.4   | -              |
| >cluster_58   |      |       |      |       |                |
| YCATTAA       | 522  | 2362  | 0.22 | 20.3  | -              |
| TCATTANY      | 389  | 2156  | 0.18 | 13    | V\$IPF1_Q4     |
| ATTAAT        | 110  | 334   | 0.33 | 10.9  | -              |
| KCATNAAT      | 73   | 219   | 0.33 | 10.7  | -              |
| GCCWTTAM      | 64   | 301   | 0.21 | 10.4  | -              |
| YYAATGAG      | 80   | 397   | 0.20 | 10.1  | V\$ALPHACP1_01 |
| GCCYWTAA      | 60   | 282   | 0.21 | 10.1  | -              |
| TAAWGGChS     | 66   | 333   | 0.20 | 9.5   | -              |
| TTAANGAG      | 56   | 280   | 0.20 | 8.1   | -              |
| YCATGAA       | 60   | 294   | 0.20 | 7.9   | -              |
| >cluster_59   |      |       |      |       |                |
| WCTCNATGGY    | 51   | 127   | 0.40 | 19.9  | -              |
| CATGGCNR      | 258  | 1005  | 0.26 | 22.4  | -              |
| CCATGGM       | 246  | 1073  | 0.23 | 18.1  | -              |
| KCTATGGY      | 54   | 203   | 0.27 | 12.9  | -              |
| CCGYATGW      | 61   | 169   | 0.36 | 12.4  | -              |
| CTCTARR       | 54   | 187   | 0.29 | 12.2  | -              |
| >cluster_60   |      |       |      |       |                |
| TTGTTT        | 391  | 1430  | 0.27 | 19.8  | V\$FOX4_01     |
| TTGNTT        | 686  | 4000  | 0.17 | 12.84 | -              |
| TGTTTTGR      | 52   | 206   | 0.25 | 11.4  | V\$FAC1_01     |
| WMAACAAG      | 69   | 260   | 0.27 | 11.3  | V\$FOX4_01     |
| MNTTGTTA      | 60   | 211   | 0.28 | 10.5  | -              |
| AAAYAATR      | 56   | 181   | 0.31 | 9.6   | V\$SOX5_01     |
| >cluster_61   |      |       |      |       |                |
| YTAATTA       | 245  | 901   | 0.27 | 19.8  | V\$LHX3_01     |
| TTAATT        | 1627 | 7181  | 0.23 | 30.4  | V\$NKX61_01    |
| TTTNATT       | 259  | 1053  | 0.25 | 16.6  | -              |
| AATNAAG       | 1049 | 6119  | 0.17 | 14.7  | -              |
| ACTNYATTNC    | 58   | 179   | 0.32 | 13.9  | -              |
| TTAATTG       | 238  | 1204  | 0.20 | 12.5  | V\$NKX61_01    |

|                |      |      |      |      |                 |
|----------------|------|------|------|------|-----------------|
| YNAAWYAAC      | 111  | 562  | 0.20 | 11.8 | -               |
| KMAATWWAGC     | 63   | 299  | 0.21 | 10.3 | -               |
| TTTWAWTAGY     | 57   | 276  | 0.21 | 9.2  | -               |
| ATTNNATT       | 93   | 436  | 0.21 | 8.7  | -               |
| TAANMAAG       | 72   | 366  | 0.20 | 8.5  | -               |
| >cluster_62    |      |      |      |      |                 |
| SMTTTTGT       | 150  | 410  | 0.37 | 19.1 | -               |
| ACAAWAGC       | 65   | 163  | 0.40 | 17.2 | -               |
| MTTTTGT        | 124  | 374  | 0.33 | 15.6 | -               |
| CCCYWTTGT      | 56   | 163  | 0.34 | 14   | -               |
| CCTWTTGT       | 55   | 161  | 0.34 | 12.4 | -               |
| TCTWTTGT       | 151  | 749  | 0.20 | 11   | -               |
| CGCYWTTGY      | 64   | 329  | 0.19 | 10.5 | -               |
| GCCNWTGTGY     | 55   | 219  | 0.25 | 9.9  | -               |
| GCTKWYGTG      | 54   | 310  | 0.17 | 8.8  | -               |
| >cluster_63    |      |      |      |      |                 |
| AAGWWRNYGGC    | 90   | 260  | 0.35 | 19.1 | -               |
| GCCNNNWTTGT    | 54   | 238  | 0.23 | 11.3 | -               |
| AAGWWRNYNGCG   | 54   | 280  | 0.19 | 9.9  | -               |
| GCCNNNWWGTT    | 60   | 374  | 0.16 | 9.7  | -               |
| >cluster_64    |      |      |      |      |                 |
| TTANTCA        | 841  | 4288 | 0.20 | 18.8 | -               |
| CTTWGTCA       | 57   | 286  | 0.20 | 9.4  | V\$AP1_Q4       |
| RTTTMRCA       | 88   | 524  | 0.17 | 9.2  | -               |
| >cluster_65    |      |      |      |      |                 |
| ARGGGTTAA      | 85   | 209  | 0.41 | 18.7 | -               |
| RRGGTTAA       | 242  | 972  | 0.25 | 16.6 | V\$PXR_Q2       |
| RGTTAAA        | 443  | 2460 | 0.18 | 14.2 | -               |
| RNAGTTAAY      | 188  | 1059 | 0.18 | 10.9 | -               |
| WTTAACCTY      | 57   | 303  | 0.19 | 8.9  | -               |
| >cluster_66    |      |      |      |      |                 |
| RACTNNRRTTNC   | 62   | 199  | 0.31 | 18.5 | -               |
| >cluster_67    |      |      |      |      |                 |
| TGANNYRGCA     | 230  | 1045 | 0.22 | 17.5 | V\$TCF11MAFG_01 |
| TGACWYRGGCA    | 55   | 169  | 0.33 | 14.1 | V\$TCF11MAFG_01 |
| RTGANNWGGCA    | 68   | 300  | 0.23 | 12.8 | V\$TCF11MAFG_01 |
| TTGNYYNRNCAA   | 134  | 810  | 0.17 | 11   | -               |
| YTGNNYRNCAA    | 96   | 509  | 0.19 | 10.2 | -               |
| TGANNYRNCAA    | 79   | 417  | 0.19 | 9.3  | -               |
| >cluster_68    |      |      |      |      |                 |
| RGAANN TTC     | 177  | 1006 | 0.18 | 17.4 | V\$HSF1_01      |
| >cluster_69    |      |      |      |      |                 |
| SGCGSSAAA      | 141  | 683  | 0.21 | 17.3 | V\$E2F1DP2_01   |
| SGCGCCAAWW     | 81   | 337  | 0.24 | 12   | V\$E2F_03       |
| KTTGRGCG       | 84   | 505  | 0.17 | 9.9  | V\$E2F1DP1R8_01 |
| >cluster_70    |      |      |      |      |                 |
| CGTSACG        | 256  | 1410 | 0.18 | 17.2 | V\$PAX3_B       |
| >cluster_71    |      |      |      |      |                 |
| SYATTGTG       | 87   | 232  | 0.38 | 17.1 | -               |
| YWTTGTGT       | 116  | 315  | 0.37 | 16.9 | -               |
| SCATTNTGG      | 78   | 253  | 0.31 | 16.9 | -               |
| GNATTSTGGG     | 56   | 182  | 0.31 | 14.7 | -               |
| YWTTGTGC       | 106  | 376  | 0.28 | 14.5 | -               |
| CTTYSTGT       | 123  | 639  | 0.19 | 14.3 | -               |
| YWTTGTGA       | 65   | 238  | 0.27 | 11.5 | -               |
| YWTTGTG        | 160  | 887  | 0.18 | 10   | -               |
| SCATTNTGG      | 58   | 271  | 0.21 | 9.6  | -               |
| WTTGYGTG       | 59   | 308  | 0.19 | 7.5  | -               |
| >cluster_72    |      |      |      |      |                 |
| TTCYRGAA       | 144  | 734  | 0.20 | 17.1 | -               |
| TTNNKGAA       | 118  | 728  | 0.16 | 9.7  | -               |
| >cluster_73    |      |      |      |      |                 |
| CTTTGA         | 1029 | 5587 | 0.18 | 17   | V\$LEF1_Q2      |
| CCTYTGA        | 124  | 745  | 0.17 | 9.7  | -               |
| WTCAAAG        | 94   | 494  | 0.19 | 9.2  | V\$TCF4_Q5      |
| RCCTNTRATT     | 55   | 299  | 0.18 | 9.2  | -               |
| >cluster_74    |      |      |      |      |                 |
| GGAMTNNNNNTCCY | 86   | 498  | 0.17 | 16.7 | -               |
| GACKNYNNNTCCYR | 52   | 233  | 0.22 | 11.3 | -               |
| >cluster_75    |      |      |      |      |                 |
| TNCATNTCCYR    | 66   | 220  | 0.30 | 16.5 | -               |
| YATTTCCCR      | 51   | 228  | 0.22 | 12.2 | V\$STAT1_02     |
| YNGGANTTGYA    | 63   | 296  | 0.21 | 10.5 | -               |
| >cluster_76    |      |      |      |      |                 |
| CAGGTA         | 227  | 1137 | 0.20 | 16.3 | V\$AREB6_01     |
| AGGTAA         | 162  | 783  | 0.21 | 12.8 | -               |
| YYCAGRTAA      | 106  | 628  | 0.17 | 9.5  | -               |
| >cluster_77    |      |      |      |      |                 |
| AAAYRNCTG      | 297  | 1657 | 0.18 | 16.3 | -               |
| CAARYRTTT      | 175  | 1055 | 0.17 | 14.1 | -               |
| AAAYNGYTGA     | 62   | 316  | 0.20 | 10.4 | -               |
| CAAWNYTTT      | 65   | 272  | 0.24 | 9.5  | -               |
| >cluster_78    |      |      |      |      |                 |
| GCTNWTGK       | 141  | 622  | 0.23 | 16.2 | -               |
| GCCNNATTGG     | 83   | 407  | 0.20 | 14.3 | -               |
| CTCWTTGT       | 56   | 216  | 0.26 | 11.1 | -               |
| GCGNNNATTGKY   | 51   | 286  | 0.18 | 10.8 | -               |
| CCTNWTGK       | 82   | 524  | 0.16 | 10.5 | -               |
| GCTSTTRY       | 53   | 261  | 0.20 | 9    | -               |
| RNCCANTSAGC    | 60   | 297  | 0.20 | 8.7  | -               |
| >cluster_79    |      |      |      |      |                 |
| WGGAAATGY      | 293  | 1398 | 0.21 | 16.1 | V\$TEF1_Q6      |
| TGGAATKY       | 302  | 1623 | 0.19 | 15.6 | -               |
| RMATTCCT       | 94   | 386  | 0.24 | 14.5 | -               |



|                |     |      |      |      |                  |
|----------------|-----|------|------|------|------------------|
| RAATTCC        | 459 | 2656 | 0.17 | 12.6 | -                |
| GGACTTY        | 337 | 1883 | 0.18 | 11.9 | -                |
| SGGACTY        | 54  | 313  | 0.17 | 11.8 | V\$NFKB_C        |
| RKGAAGTC       | 196 | 1127 | 0.17 | 11   | -                |
| WGGAAAGTC      | 62  | 345  | 0.18 | 8.7  | -                |
| GGAWTGT        | 95  | 515  | 0.18 | 7.9  | -                |
| WKGAATT        | 50  | 229  | 0.22 | 7.7  | -                |
| >cluster_80    |     |      |      |      |                  |
| SNACANNYSYAGA  | 50  | 195  | 0.26 | 15.8 | -                |
| YKACANNNNNCAGA | 61  | 322  | 0.19 | 11.5 | -                |
| >cluster_81    |     |      |      |      |                  |
| CGGAARNGGCNG   | 50  | 235  | 0.21 | 15.7 | -                |
| >cluster_82    |     |      |      |      |                  |
| CTGYNNCTYTAA   | 55  | 170  | 0.32 | 15.5 | -                |
| CTGNNNYTTTRA   | 52  | 170  | 0.31 | 15.3 | -                |
| YGTNNMWTTAA    | 72  | 339  | 0.21 | 13   | -                |
| >cluster_83    |     |      |      |      |                  |
| TGTTTGY        | 590 | 3090 | 0.19 | 15.1 | V\$HNF3_Q6       |
| TGTTTGTNY      | 61  | 226  | 0.27 | 11.6 | V\$HNF3_Q6       |
| TGTYKRYTTT     | 128 | 790  | 0.16 | 10.9 | -                |
| AAGYAAACA      | 70  | 367  | 0.19 | 9.8  | V\$FREAC4_01     |
| YGTTCCTY       | 64  | 364  | 0.18 | 6.9  | V\$DBP_Q6        |
| >cluster_84    |     |      |      |      |                  |
| RGTTAMWNATT    | 63  | 228  | 0.28 | 15   | V\$HNF1_01       |
| GTTWNWNATTAR   | 55  | 248  | 0.22 | 12   | -                |
| AGTNNNYNRRTTAR | 77  | 445  | 0.17 | 10   | -                |
| >cluster_85    |     |      |      |      |                  |
| STTTTCRNTT     | 120 | 568  | 0.21 | 14.9 | V\$IRF_Q6        |
| GAANNMGGAAARY  | 61  | 240  | 0.25 | 18.1 | -                |
| RNAAGNRGAARY   | 144 | 760  | 0.19 | 14.8 | -                |
| RGAANNNGAAANY  | 139 | 829  | 0.17 | 13.7 | V\$IRF_Q6        |
| WTCKKSGTT      | 55  | 303  | 0.18 | 12.7 | -                |
| AAANNMGGAAANY  | 68  | 383  | 0.18 | 10.6 | -                |
| AAANMRNAAGY    | 62  | 337  | 0.18 | 10.6 | -                |
| RNTTCNTYATT    | 79  | 464  | 0.17 | 9.4  | -                |
| >cluster_86    |     |      |      |      |                  |
| GGNNNTTCC      | 91  | 420  | 0.22 | 14.9 | V\$NFKB_Q6_01    |
| GGAAAYTCCY     | 65  | 296  | 0.22 | 11   | V\$NFKB_Q6       |
| TGGNAWNYCCC    | 59  | 328  | 0.18 | 10.3 | V\$NFKAPPAB_01   |
| KGAANTTCC      | 58  | 287  | 0.20 | 10.3 | V\$NFKAPPAB65_01 |
| GGANTTSC       | 117 | 693  | 0.17 | 10.1 | V\$NFKAPPAB65_01 |
| TGRRWTTCY      | 84  | 473  | 0.18 | 9.5  | -                |
| >cluster_87    |     |      |      |      |                  |
| RYTGCNWTGGNR   | 49  | 201  | 0.24 | 14.6 | -                |
| YTGCVNNGGTRW   | 54  | 255  | 0.21 | 8.6  | -                |
| >cluster_88    |     |      |      |      |                  |
| GGCNKCCATNK    | 80  | 307  | 0.26 | 14.3 | -                |
| CGNNRYCATNK    | 78  | 306  | 0.25 | 13.7 | -                |
| CGCNKNNGYCATNK | 50  | 203  | 0.25 | 13.5 | -                |
| GGCNNYNKMCCAT  | 53  | 309  | 0.17 | 9.5  | -                |
| ATGRMNKYGCC    | 46  | 231  | 0.20 | 9.3  | -                |
| >cluster_89    |     |      |      |      |                  |
| GTTNYNNGGTNA   | 60  | 263  | 0.23 | 14.3 | -                |
| YYGCCNRRRNAAC  | 72  | 422  | 0.17 | 15.2 | -                |
| GTTNYCNNGGAGNY | 62  | 258  | 0.24 | 13.2 | -                |
| KYTCCNRRRNAAC  | 52  | 292  | 0.18 | 12.6 | -                |
| >cluster_90    |     |      |      |      |                  |
| YAATNRNNYNNATT | 128 | 624  | 0.21 | 14.3 | -                |
| YAATYRNNNNYAAT | 62  | 278  | 0.22 | 13.1 | -                |
| WAATNNYNNATTAR | 53  | 286  | 0.19 | 9.2  | V\$CART1_01      |
| >cluster_91    |     |      |      |      |                  |
| GTGGGTGK       | 213 | 1062 | 0.20 | 14.1 | -                |
| >cluster_92    |     |      |      |      |                  |
| TGCTGAY        | 409 | 2089 | 0.20 | 14   | -                |
| YGCTGACTY      | 65  | 250  | 0.26 | 13.2 | -                |
| GCTGACRK       | 143 | 794  | 0.18 | 13.2 | -                |
| WTCARCAC       | 63  | 289  | 0.22 | 11.2 | -                |
| RTGCTGAMR      | 52  | 242  | 0.21 | 11.1 | -                |
| GGTGCTKA       | 67  | 380  | 0.18 | 10.3 | -                |
| TGCWRATT       | 232 | 1399 | 0.17 | 9.8  | -                |
| >cluster_93    |     |      |      |      |                  |
| GGATTA         | 501 | 2421 | 0.21 | 14   | V\$PITX2_Q2      |
| >cluster_94    |     |      |      |      |                  |
| TGATTRY        | 252 | 1365 | 0.18 | 13.9 | V\$GFI1_01       |
| TGATTTANR      | 147 | 753  | 0.20 | 12.5 | -                |
| AAAYCACNR      | 234 | 1342 | 0.17 | 11.6 | -                |
| YNGTGATTNR     | 151 | 801  | 0.19 | 10.9 | V\$GFI1_01       |
| TGATYTATNR     | 55  | 255  | 0.22 | 10.1 | -                |
| GTGATRR        | 80  | 355  | 0.23 | 10.1 | -                |
| GTAAATM        | 58  | 220  | 0.26 | 8.9  | V\$FREAC3_01     |
| >cluster_95    |     |      |      |      |                  |
| GCCNNWTAAR     | 70  | 303  | 0.23 | 13.7 | -                |
| GCCNNTWAAAG    | 52  | 173  | 0.30 | 15.4 | -                |
| CCCNWWTAA      | 59  | 277  | 0.21 | 10.6 | -                |
| >cluster_96    |     |      |      |      |                  |
| YGCANTGCR      | 124 | 710  | 0.17 | 13.7 | -                |
| CYGCANTGC      | 99  | 428  | 0.23 | 11.3 | -                |
| RNAATGCA       | 88  | 514  | 0.17 | 7.8  | -                |
| >cluster_97    |     |      |      |      |                  |
| YATTNATC       | 330 | 1772 | 0.19 | 13.7 | -                |
| RATCRATA       | 114 | 453  | 0.25 | 12.2 | V\$CDP_02        |
| >cluster_98    |     |      |      |      |                  |
| GTCNYATGR      | 54  | 200  | 0.27 | 13.6 | -                |

|                 |     |      |      |      |            |
|-----------------|-----|------|------|------|------------|
| GTCKCCATNK      | 56  | 211  | 0.27 | 12.6 | -          |
| GGTYNYNATG      | 61  | 304  | 0.20 | 11.6 | -          |
| YYATGSAGAY      | 53  | 263  | 0.20 | 9.5  | -          |
| GTCNNNTGGYR     | 96  | 528  | 0.18 | 9.5  | -          |
| TGTYSYATGR      | 55  | 303  | 0.18 | 9.4  | -          |
| >cluster_99     |     |      |      |      |            |
| ATCMNTCCGY      | 49  | 129  | 0.38 | 13.3 | -          |
| KRTCCNTCCSC     | 51  | 254  | 0.20 | 11.2 | -          |
| >cluster_100    |     |      |      |      |            |
| CRGAARNNNCGA    | 53  | 285  | 0.19 | 13.3 | -          |
| >cluster_101    |     |      |      |      |            |
| CTGCAGY         | 693 | 4061 | 0.17 | 13.2 | -          |
| >cluster_102    |     |      |      |      |            |
| ATGGYGGGA       | 58  | 212  | 0.27 | 13.2 | -          |
| >cluster_103    |     |      |      |      |            |
| ACAWNRNSRCCG    | 55  | 213  | 0.26 | 13.1 | -          |
| >cluster_104    |     |      |      |      |            |
| CCAATNNSNNGCG   | 55  | 294  | 0.19 | 13   | -          |
| >cluster_105    |     |      |      |      |            |
| ACTWSNACTNY     | 54  | 232  | 0.23 | 13   | -          |
| >cluster_106    |     |      |      |      |            |
| CCGNMNTNACG     | 68  | 380  | 0.18 | 12.9 | -          |
| >cluster_107    |     |      |      |      |            |
| RTTTNNYTGGM     | 144 | 813  | 0.18 | 12.8 | -          |
| >cluster_108    |     |      |      |      |            |
| AACWVCAANK      | 56  | 208  | 0.27 | 12.7 | -          |
| TGTTGK          | 112 | 542  | 0.21 | 10.1 | V\$FAC1_01 |
| GAAYNACANY      | 59  | 287  | 0.21 | 10   | -          |
| GAANKWCAA       | 57  | 294  | 0.19 | 9.2  | -          |
| >cluster_109    |     |      |      |      |            |
| YGTCTTGR        | 69  | 307  | 0.22 | 12.7 | -          |
| >cluster_110    |     |      |      |      |            |
| MCAATNNSNNGCG   | 66  | 320  | 0.21 | 12.5 | -          |
| >cluster_111    |     |      |      |      |            |
| RACCACAR        | 222 | 1332 | 0.17 | 12.3 | V\$AML_Q6  |
| AACYRNAAC       | 55  | 313  | 0.18 | 9.8  | -          |
| >cluster_112    |     |      |      |      |            |
| KTGGYRSGAA      | 52  | 228  | 0.23 | 12.3 | -          |
| TTGNRYGGAR      | 64  | 351  | 0.18 | 12.3 | -          |
| >cluster_113    |     |      |      |      |            |
| AACYNNNTTCCS    | 53  | 281  | 0.19 | 12.3 | -          |
| >cluster_114    |     |      |      |      |            |
| YTCCRNAGGY      | 50  | 327  | 0.15 | 12.2 | -          |
| TCCMANNWGGC     | 59  | 348  | 0.17 | 11.7 | -          |
| >cluster_115    |     |      |      |      |            |
| YRTCANNRCGC     | 56  | 309  | 0.18 | 12.2 | -          |
| >cluster_116    |     |      |      |      |            |
| KMCATNNWGGGA    | 52  | 181  | 0.29 | 12.2 | -          |
| >cluster_117    |     |      |      |      |            |
| TGTNNNNRGGARM   | 69  | 373  | 0.19 | 12.1 | -          |
| GTCNNNRGCAMS    | 50  | 268  | 0.19 | 11.5 | -          |
| GCCNNTGACR      | 57  | 253  | 0.23 | 9.4  | -          |
| GGCNRRTGAC      | 67  | 343  | 0.20 | 9.3  | -          |
| GTCAYNNGGC      | 55  | 298  | 0.18 | 8    | -          |
| >cluster_118    |     |      |      |      |            |
| GGCNRNWCTTYS    | 51  | 320  | 0.16 | 12   | -          |
| >cluster_119    |     |      |      |      |            |
| GGNRMNNYCAT     | 56  | 295  | 0.19 | 11.9 | -          |
| ATGGYNRCCG      | 51  | 231  | 0.22 | 11.5 | -          |
| MAATRGNNGCG     | 50  | 253  | 0.20 | 10.1 | -          |
| WAATNNCNGCG     | 50  | 223  | 0.22 | 9.4  | -          |
| >cluster_120    |     |      |      |      |            |
| KRCTCnnnnMAnAGC | 48  | 185  | 0.26 | 11.8 | -          |
| GCTMTNWWNAGA    | 50  | 162  | 0.31 | 13.4 | -          |
| STCTNNWNRGAGNC  | 52  | 209  | 0.25 | 13   | -          |
| YTCTNNNARNGCCNY | 50  | 215  | 0.23 | 11.8 | -          |
| RNGGCTNYNNNAGAS | 50  | 220  | 0.23 | 11.8 | -          |
| GCTNWWNNNAGAGYM | 52  | 203  | 0.26 | 11.5 | -          |
| TCCNMYAT        | 62  | 311  | 0.20 | 10.4 | -          |
| CTCANNYAATNR    | 56  | 326  | 0.17 | 10.1 | -          |
| RCTCANNWMAGANS  | 49  | 222  | 0.22 | 9.3  | -          |
| >cluster_121    |     |      |      |      |            |
| CCAWWNAAGG      | 62  | 270  | 0.23 | 11.7 | V\$SRF_Q4  |
| TCCWWNWTGG      | 61  | 300  | 0.20 | 11.4 | V\$SRF_Q4  |
| YTCCRKNTTG      | 56  | 321  | 0.17 | 9.4  | -          |
| MCAATNNGAG      | 49  | 258  | 0.19 | 9.2  | -          |
| CTTWNWAGG       | 57  | 310  | 0.18 | 9.1  | -          |
| YNAATNAGG       | 156 | 876  | 0.18 | 9.04 | -          |
| GCCNWWAAG       | 27  | 100  | 0.27 | 9.02 | -          |
| SYAAAYRAGG      | 53  | 258  | 0.21 | 8.7  | -          |
| TCCNATTRR       | 57  | 312  | 0.18 | 8.3  | -          |
| >cluster_122    |     |      |      |      |            |
| RNTCANNRNNYATTW | 62  | 352  | 0.18 | 11.7 | -          |
| >cluster_123    |     |      |      |      |            |
| GGCNNMSMYNTTG   | 54  | 314  | 0.17 | 11.6 | -          |
| GGCNNNNNATTGK   | 55  | 301  | 0.18 | 10.4 | -          |

|                |     |      |      |      |            |
|----------------|-----|------|------|------|------------|
| >cluster_124   |     |      |      |      |            |
| CCAAYNNGAAR    | 60  | 320  | 0.19 | 11.5 | -          |
| MCAATNRGAG     | 74  | 362  | 0.20 | 16.1 | -          |
| RCCAAAYGGAR    | 61  | 265  | 0.23 | 15.4 | -          |
| TTNNNWTGR      | 53  | 170  | 0.31 | 11.4 | -          |
| TCTNRYTGGY     | 101 | 593  | 0.17 | 9.9  | -          |
| >cluster_125   |     |      |      |      |            |
| RAAGNYNCTTY    | 144 | 878  | 0.16 | 11.5 | -          |
| >cluster_126   |     |      |      |      |            |
| WYAAANRRNNNGCG | 52  | 268  | 0.19 | 11.4 | -          |
| TYAAANNNNCGC   | 61  | 252  | 0.24 | 15.9 | -          |
| >cluster_127   |     |      |      |      |            |
| WWTAAAGGC      | 58  | 238  | 0.24 | 11.3 | -          |
| MNTTAMGGC      | 55  | 280  | 0.20 | 9.5  | -          |
| >cluster_128   |     |      |      |      |            |
| RYCACNRRNRCAG  | 61  | 325  | 0.19 | 11.3 | -          |
| >cluster_129   |     |      |      |      |            |
| RRAGTTGT       | 87  | 473  | 0.18 | 11.2 | -          |
| YKACANCTCSM    | 50  | 296  | 0.17 | 11   | -          |
| AAANWTGT       | 73  | 330  | 0.22 | 9.7  | -          |
| RGGAGTRW       | 55  | 292  | 0.19 | 9.4  | -          |
| RNAAASYGTNR    | 68  | 406  | 0.17 | 8.8  | -          |
| >cluster_130   |     |      |      |      |            |
| CCCNNGGGAR     | 177 | 1095 | 0.16 | 11.2 | V\$OLF1_01 |
| >cluster_131   |     |      |      |      |            |
| GATAAGR        | 251 | 1379 | 0.18 | 11.2 | V\$GATA_C  |
| WGATAAGR       | 170 | 973  | 0.17 | 10.3 | V\$GATA_C  |
| >cluster_132   |     |      |      |      |            |
| TCCATTKW       | 57  | 221  | 0.26 | 11.1 | -          |
| RNAAAYNRAGGC   | 52  | 222  | 0.23 | 15.7 | -          |
| AAAYWGAGRY     | 44  | 188  | 0.23 | 14   | -          |
| TCCWTTGT       | 136 | 691  | 0.20 | 12   | -          |
| CTCYATTNW      | 62  | 262  | 0.24 | 11.1 | -          |
| >cluster_133   |     |      |      |      |            |
| RYTAAWNNNTGAY  | 54  | 242  | 0.22 | 11.1 | -          |
| >cluster_134   |     |      |      |      |            |
| CATRRAGC       | 61  | 257  | 0.24 | 11.1 | -          |
| GGCKCCATNW     | 54  | 194  | 0.28 | 14.1 | -          |
| GGCNCMATG      | 54  | 288  | 0.19 | 9.7  | -          |
| >cluster_135   |     |      |      |      |            |
| AGCYRWTTTC     | 99  | 547  | 0.18 | 11.1 | -          |
| >cluster_136   |     |      |      |      |            |
| TAAYNRNNTCC    | 132 | 719  | 0.18 | 11   | -          |
| GAARKNGTTAR    | 56  | 194  | 0.29 | 14.3 | -          |
| RKCTGNNNNRMTTA | 59  | 238  | 0.25 | 12.8 | -          |
| YRTCTGNNNNNNTT | 53  | 269  | 0.20 | 11.8 | -          |
| GAANSRRRTTA    | 91  | 452  | 0.20 | 11.2 | -          |
| TAATKRNNNCCA   | 60  | 281  | 0.21 | 11.1 | -          |
| STAATNRNNNCAG  | 49  | 191  | 0.26 | 11   | -          |
| AATNNNNNCAGCNG | 52  | 251  | 0.21 | 10.2 | -          |
| >cluster_137   |     |      |      |      |            |
| GAANYNYGACNY   | 54  | 263  | 0.21 | 11   | -          |
| >cluster_138   |     |      |      |      |            |
| MYAATNNNNNNGGC | 63  | 339  | 0.19 | 11   | -          |
| >cluster_139   |     |      |      |      |            |
| AAAYWAACM      | 54  | 206  | 0.26 | 11   | V\$HFH4_01 |
| >cluster_140   |     |      |      |      |            |
| RNGTGGGC       | 363 | 2106 | 0.17 | 10.9 | -          |
| TGTGGGYR       | 199 | 1223 | 0.16 | 10.4 | -          |
| YRCGTGGG       | 88  | 397  | 0.22 | 9.1  | -          |
| >cluster_141   |     |      |      |      |            |
| TTCNRGNNNTTC   | 59  | 335  | 0.18 | 10.9 | V\$HSF_Q6  |
| >cluster_142   |     |      |      |      |            |
| ACAWYAAAG      | 85  | 373  | 0.23 | 10.9 | -          |
| >cluster_143   |     |      |      |      |            |
| CAGNWMCNNGAC   | 51  | 256  | 0.20 | 10.8 | -          |
| YRGCAMNNNGAC   | 58  | 302  | 0.19 | 10.5 | -          |
| SNACCNNRRACAR  | 52  | 256  | 0.20 | 10.4 | -          |
| >cluster_144   |     |      |      |      |            |
| AAANWWTGC      | 63  | 250  | 0.25 | 10.8 | -          |
| CGCYWWTGT      | 65  | 270  | 0.24 | 11.9 | -          |
| CGNAWNTTT      | 52  | 210  | 0.25 | 11.5 | -          |
| >cluster_145   |     |      |      |      |            |
| YKACATTT       | 58  | 217  | 0.27 | 10.7 | -          |
| >cluster_146   |     |      |      |      |            |
| RRCCGTTA       | 59  | 230  | 0.26 | 10.5 | -          |
| >cluster_147   |     |      |      |      |            |
| YAATNANRNNNCAG | 58  | 307  | 0.19 | 10.5 | -          |
| YYAATnAnnnnCCA | 55  | 278  | 0.20 | 10.4 | -          |
| TGGYNNNRATTNR  | 78  | 406  | 0.19 | 10.3 | -          |
| >cluster_148   |     |      |      |      |            |
| GATGKMRGCG     | 58  | 230  | 0.25 | 10.5 | -          |
| >cluster_149   |     |      |      |      |            |
| YGACNNYACAR    | 62  | 291  | 0.21 | 10.4 | -          |
| GGTKRNGTCA     | 57  | 271  | 0.21 | 9.5  | -          |
| YGACCNCAC      | 61  | 319  | 0.19 | 8.1  | -          |

|                 |     |     |      |      |             |
|-----------------|-----|-----|------|------|-------------|
| >cluster_150    |     |     |      |      |             |
| YTTCCNNNGGAMR   | 51  | 240 | 0.21 | 10.4 | -           |
| >cluster_151    |     |     |      |      |             |
| RYAAAKNNNNNTTGW | 71  | 435 | 0.16 | 10.4 | -           |
| CAAAGRNNNYTTT   | 57  | 322 | 0.18 | 9.2  | -           |
| RWTGGNNNNTTT    | 53  | 300 | 0.18 | 9.1  | -           |
| >cluster_152    |     |     |      |      |             |
| WCAANNNYCAG     | 85  | 514 | 0.17 | 10.3 | -           |
| TGRRNTTGYR      | 66  | 366 | 0.18 | 10.3 | -           |
| >cluster_153    |     |     |      |      |             |
| CTGRYYNATT      | 65  | 364 | 0.18 | 10.3 | -           |
| >cluster_154    |     |     |      |      |             |
| RNCTGNYNRNCTGNY | 67  | 387 | 0.17 | 10.2 | -           |
| AGCSWRTCAS      | 58  | 225 | 0.26 | 10.8 | -           |
| TGAYWRRCTG      | 64  | 307 | 0.21 | 8.8  | -           |
| >cluster_155    |     |     |      |      |             |
| WGTNNNNNAAAA    | 88  | 467 | 0.19 | 10.2 | -           |
| TTTRYNNRACA     | 56  | 321 | 0.17 | 9.9  | -           |
| >cluster_156    |     |     |      |      |             |
| YRCCAKNNGCNC    | 51  | 296 | 0.17 | 10.2 | -           |
| >cluster_157    |     |     |      |      |             |
| KCCGNSWTTT      | 81  | 405 | 0.20 | 10.2 | -           |
| >cluster_158    |     |     |      |      |             |
| CCNNNNNAAGWT    | 49  | 272 | 0.18 | 10.2 | -           |
| >cluster_159    |     |     |      |      |             |
| GGCKCATGS       | 52  | 307 | 0.17 | 9.9  | -           |
| >cluster_160    |     |     |      |      |             |
| CAGNYGKNAAA     | 68  | 386 | 0.18 | 9.9  | -           |
| YAGCYRNYAGC     | 55  | 308 | 0.18 | 8.7  | -           |
| >cluster_161    |     |     |      |      |             |
| TTANWNTGGM      | 61  | 335 | 0.18 | 9.8  | -           |
| SCATYRNTAA      | 65  | 365 | 0.18 | 8.9  | -           |
| >cluster_162    |     |     |      |      |             |
| TAANNYSGCG      | 61  | 340 | 0.18 | 9.8  | -           |
| >cluster_163    |     |     |      |      |             |
| GGARNTKYCCA     | 50  | 269 | 0.19 | 9.8  | -           |
| >cluster_164    |     |     |      |      |             |
| GCGSCMNTT       | 51  | 275 | 0.19 | 9.8  | -           |
| >cluster_165    |     |     |      |      |             |
| CCAWNWNNGGC     | 53  | 281 | 0.19 | 9.8  | -           |
| >cluster_166    |     |     |      |      |             |
| YNTTNNNANGCARM  | 63  | 328 | 0.19 | 9.6  | -           |
| >cluster_167    |     |     |      |      |             |
| CCTNTMAGA       | 51  | 255 | 0.20 | 9.6  | -           |
| >cluster_168    |     |     |      |      |             |
| YTAAYNGCT       | 130 | 763 | 0.17 | 9.5  | -           |
| >cluster_169    |     |     |      |      |             |
| TTNNANAGCYR     | 92  | 545 | 0.17 | 9.5  | -           |
| >cluster_170    |     |     |      |      |             |
| YNGTTNNATT      | 71  | 366 | 0.19 | 9.1  | -           |
| >cluster_171    |     |     |      |      |             |
| CTCNANGTGN      | 52  | 255 | 0.20 | 9.1  | -           |
| >cluster_172    |     |     |      |      |             |
| TTGCWCAAY       | 48  | 249 | 0.19 | 9    | V\$CEBPB_02 |
| >cluster_173    |     |     |      |      |             |
| YWATTWNNRGCT    | 62  | 363 | 0.17 | 8.8  | -           |
| RWTTAYAGCY      | 55  | 265 | 0.21 | 8.8  | -           |
| ATTNWNAGC       | 70  | 392 | 0.18 | 8.6  | -           |
| >cluster_174    |     |     |      |      |             |
| WTGAAAT         | 61  | 295 | 0.21 | 8.1  | -           |

Supplementary Table S4 **Motifs discovered in 3' UTR**

| Motif        | Conserved num | Total num | Conservation rate | MCS   |
|--------------|---------------|-----------|-------------------|-------|
| >motif 1     |               |           |                   |       |
| AATAAA       | 6617          | 14266     | 0.46              | 135.7 |
| AAATAAA      | 2078          | 6041      | 0.34              | 66.6  |
| CAATAAA      | 1111          | 2632      | 0.42              | 57.7  |
| TAATAAA      | 1210          | 3510      | 0.34              | 50.9  |
| GAATAAA      | 559           | 2148      | 0.26              | 26.4  |
| CAAWWAAA     | 638           | 3120      | 0.20              | 21.1  |
| TGAMYAAA     | 374           | 1789      | 0.21              | 19.5  |
| GCAWTWAAA    | 127           | 571       | 0.22              | 12.4  |
| >motif 2     |               |           |                   |       |
| TATTTAT      | 1758          | 3706      | 0.47              | 79.4  |
| TATTTAA      | 978           | 3158      | 0.31              | 41.6  |
| CTATTTWW     | 622           | 2533      | 0.25              | 23.6  |
| GTAATAG      | 75            | 265       | 0.28              | 12.4  |
| >motif 3     |               |           |                   |       |
| TGTAnATA     | 1528          | 2968      | 0.51              | 70.4  |
| TGRnWTAT     | 744           | 2799      | 0.27              | 30.6  |
| TGRnnTWTAT   | 216           | 1032      | 0.21              | 15.0  |
| TTGTRTATWT   | 112           | 411       | 0.27              | 13.2  |
| CTGTnTnTAT   | 129           | 635       | 0.20              | 10.3  |
| >motif 4     |               |           |                   |       |
| TATTTTT      | 2068          | 6861      | 0.30              | 58.9  |
| TATATTT      | 1033          | 3800      | 0.27              | 37.6  |
| CTAKWTTT     | 402           | 1995      | 0.20              | 15.8  |
| TATWTWTGA    | 170           | 804       | 0.21              | 14.0  |
| WATATWTTTG   | 106           | 433       | 0.24              | 13.3  |
| >motif 5     |               |           |                   |       |
| TTTGTA       | 2777          | 8873      | 0.31              | 53.4  |
| TTTnTAC      | 1623          | 6207      | 0.26              | 33.6  |
| TTTnCTA      | 1378          | 6740      | 0.20              | 25.8  |
| TTTCTA       | 1487          | 7235      | 0.21              | 24.3  |
| TTTTGATA     | 163           | 589       | 0.28              | 18.0  |
| KYTGATAAnR   | 110           | 545       | 0.20              | 8.9   |
| >motif 6     |               |           |                   |       |
| GTGCCCTT     | 606           | 1266      | 0.48              | 46.9  |
| AAGTGCCCT    | 173           | 375       | 0.46              | 27.7  |
| GGTGCCWW     | 140           | 659       | 0.21              | 14.0  |
| >motif 7     |               |           |                   |       |
| TTTTATA      | 1185          | 3861      | 0.31              | 45.4  |
| ATTTTTAT     | 393           | 1742      | 0.23              | 23.0  |
| CTTTTTAYR    | 119           | 575       | 0.21              | 9.5   |
| >motif 8     |               |           |                   |       |
| TGCATG       | 1234          | 3608      | 0.34              | 42.3  |
| YGCATGT      | 213           | 706       | 0.30              | 17.9  |
| >motif 9     |               |           |                   |       |
| TTTTGT       | 3185          | 13094     | 0.24              | 41.7  |
| TTTnTGT      | 2490          | 12301     | 0.20              | 32.4  |
| TATTYTTGTA   | 110           | 237       | 0.46              | 20.5  |
| TTAnWYTTGTR  | 108           | 429       | 0.25              | 12.8  |
| ATAnTYnTGTR  | 122           | 547       | 0.22              | 11.5  |
| >motif 10    |               |           |                   |       |
| WGCCTTA      | 669           | 1821      | 0.37              | 40.0  |
| YGCCTTAA     | 171           | 381       | 0.45              | 25.1  |
| TGCnTAA      | 494           | 1855      | 0.27              | 23.5  |
| TTGYMTTAA    | 112           | 514       | 0.22              | 10.9  |
| TCGCCTTA     | 10            | 33        | 0.30              | 10.0  |
| >motif 11    |               |           |                   |       |
| GGTGCT       | 989           | 3190      | 0.31              | 38.6  |
| GCTGCT       | 1157          | 5295      | 0.22              | 28.5  |
| YGGTGCTA     | 147           | 278       | 0.53              | 24.8  |
| TTGSTGCW     | 320           | 1444      | 0.22              | 18.3  |
| ATGSTGCW     | 256           | 1164      | 0.22              | 17.7  |
| GSTGCTAA     | 120           | 355       | 0.34              | 17.2  |
| GSTGCTAT     | 115           | 366       | 0.31              | 15.0  |
| >motif 12    |               |           |                   |       |
| RCCAAAG      | 700           | 1951      | 0.36              | 37.5  |
| ACCRWAGA     | 158           | 457       | 0.35              | 20.3  |
| GCCRWAGA     | 111           | 425       | 0.26              | 13.6  |
| TCCAAAGR     | 129           | 630       | 0.20              | 13.3  |
| CCAAAGAT     | 80            | 289       | 0.28              | 12.6  |
| CCAAAGAC     | 72            | 264       | 0.27              | 11.8  |
| >motif 13    |               |           |                   |       |
| TGRnnTTT     | 1575          | 6878      | 0.23              | 36.9  |
| WGATTTTW     | 1034          | 3981      | 0.26              | 33.2  |
| TGRnnnnTTT   | 1326          | 6418      | 0.21              | 31.5  |
| TGRnTTT      | 1373          | 6560      | 0.21              | 29.1  |
| TGTAnATT     | 674           | 2325      | 0.29              | 26.7  |
| TGTAnnTTT    | 736           | 3201      | 0.23              | 24.4  |
| TTGYAnnTTT   | 444           | 1834      | 0.24              | 22.2  |
| WTTGYRnnnTTT | 404           | 1976      | 0.20              | 20.8  |
| TGRnnTTA     | 703           | 3509      | 0.20              | 18.0  |
| TGTnnATWTTT  | 246           | 1049      | 0.23              | 17.8  |
| ATGTATWT     | 377           | 1794      | 0.21              | 15.9  |

|              |      |      |      |      |
|--------------|------|------|------|------|
| TGTAnnTWnTTA | 110  | 506  | 0.22 | 12.9 |
| TGRnYATTTW   | 121  | 586  | 0.21 | 11.8 |
| TGTAnWGTT    | 209  | 944  | 0.22 | 11.4 |
| TGTRYRnWTTA  | 124  | 599  | 0.21 | 10.5 |
| TKTACAnnTTT  | 113  | 557  | 0.20 | 9.0  |
| >motif 14    |      |      |      |      |
| GCACTTT      | 503  | 1337 | 0.38 | 35.4 |
| TGCACCTT     | 209  | 522  | 0.40 | 27.5 |
| TGCACTnW     | 607  | 2169 | 0.28 | 26.1 |
| TGCRYYTTA    | 115  | 504  | 0.23 | 11.2 |
| TGCACGTT     | 15   | 71   | 0.21 | 9.8  |
| >motif 15    |      |      |      |      |
| TGTTTAC      | 518  | 1418 | 0.37 | 35.0 |
| GTTTACAT     | 145  | 374  | 0.39 | 22.3 |
| ACGTTTAC     | 13   | 49   | 0.27 | 10.5 |
| CCGTTTAC     | 7    | 35   | 0.20 | 6.5  |
| >motif 16    |      |      |      |      |
| TAATTTAT     | 331  | 868  | 0.38 | 33.3 |
| TAATTTAA     | 195  | 812  | 0.24 | 17.2 |
| CTAAnTTAW    | 144  | 668  | 0.22 | 12.9 |
| YnTAAnTWAAG  | 116  | 514  | 0.23 | 12.3 |
| TAAGTTAT     | 81   | 331  | 0.24 | 11.3 |
| >motif 17    |      |      |      |      |
| TGTACAKW     | 712  | 2048 | 0.35 | 33.0 |
| GTACAGA      | 185  | 797  | 0.23 | 13.4 |
| GTACAGTT     | 73   | 282  | 0.26 | 11.3 |
| ACGGTACA     | 7    | 18   | 0.39 | 9.7  |
| >motif 18    |      |      |      |      |
| WGCAATA      | 664  | 1856 | 0.36 | 32.4 |
| GTGCAATA     | 133  | 248  | 0.54 | 26.9 |
| GTGCMATA     | 168  | 397  | 0.42 | 21.7 |
| RTGCMnTAT    | 185  | 762  | 0.24 | 13.9 |
| >motif 19    |      |      |      |      |
| TGTATAnW     | 1133 | 4075 | 0.28 | 31.2 |
| CTGTATWW     | 380  | 1899 | 0.20 | 13.5 |
| TnTGTATAAM   | 110  | 381  | 0.29 | 11.9 |
| >motif 20    |      |      |      |      |
| TGTRnnnnTGT  | 1018 | 4650 | 0.22 | 31.1 |
| TGTAnnnTTGY  | 188  | 820  | 0.23 | 13.0 |
| >motif 21    |      |      |      |      |
| CTCAGGRA     | 231  | 772  | 0.30 | 30.6 |
| >motif 22    |      |      |      |      |
| TGCCAAR      | 658  | 2450 | 0.27 | 30.0 |
| TTGYMAAA     | 436  | 2159 | 0.20 | 17.1 |
| TTTRCCAAR    | 112  | 500  | 0.22 | 12.9 |
| >motif 23    |      |      |      |      |
| AGCMWTAA     | 348  | 1064 | 0.33 | 29.0 |
| AAGCCATR     | 146  | 494  | 0.30 | 17.3 |
| >motif 24    |      |      |      |      |
| TTGCACW      | 676  | 2203 | 0.31 | 28.9 |
| TTTGCAW      | 826  | 2978 | 0.28 | 28.5 |
| TTTGACACW    | 372  | 980  | 0.38 | 27.8 |
| TTGYRCAA     | 237  | 948  | 0.25 | 13.6 |
| TTGCACAA     | 74   | 273  | 0.27 | 11.9 |
| >motif 25    |      |      |      |      |
| TGTGAA       | 1364 | 6081 | 0.22 | 27.4 |
| ACTGTGA      | 393  | 1300 | 0.30 | 25.7 |
| ACTGTGAA     | 173  | 477  | 0.36 | 23.2 |
| AATGTGA      | 340  | 1613 | 0.21 | 16.1 |
| ACTKYGAAAY   | 116  | 443  | 0.26 | 13.6 |
| ACTGKRAAT    | 119  | 502  | 0.24 | 12.3 |
| >motif 26    |      |      |      |      |
| TATTAATA     | 665  | 2800 | 0.24 | 26.0 |
| TGTAATWW     | 538  | 2345 | 0.23 | 21.1 |
| WGTAWTAA     | 353  | 1746 | 0.20 | 15.4 |
| >motif 27    |      |      |      |      |
| ACTKGAA      | 669  | 2690 | 0.25 | 25.8 |
| TACTTGAA     | 160  | 368  | 0.43 | 25.5 |
| ATACTTGA     | 96   | 269  | 0.36 | 17.1 |
| >motif 28    |      |      |      |      |
| CTACCTCA     | 114  | 209  | 0.55 | 25.2 |
| >motif 29    |      |      |      |      |
| TGRnnATA     | 678  | 2727 | 0.25 | 25.0 |
| TGTnnWRTAAA  | 235  | 986  | 0.24 | 18.8 |
| TGTAnnRTAA   | 213  | 784  | 0.27 | 17.1 |
| TGTAnnTAG    | 156  | 760  | 0.21 | 10.6 |
| >motif 30    |      |      |      |      |
| TATTTATTG    | 152  | 344  | 0.44 | 24.1 |
| TATTTWnTGT   | 153  | 711  | 0.22 | 13.0 |
| TATTTWnTGA   | 116  | 541  | 0.21 | 12.2 |
| >motif 31    |      |      |      |      |

|               |     |      |      |      |
|---------------|-----|------|------|------|
| WnTATWTTG     | 707 | 3180 | 0.22 | 23.4 |
| TnTATnnTGT    | 507 | 2369 | 0.21 | 17.7 |
| YnTATnnnnTGTA | 196 | 911  | 0.22 | 14.1 |
| ATAYWnTGTA    | 132 | 608  | 0.22 | 10.8 |
| >motif 32     |     |      |      |      |
| AAGCACAA      | 139 | 335  | 0.41 | 23.0 |
| AAGCACA       | 328 | 1145 | 0.29 | 22.3 |
| TTGYRCTT      | 292 | 1296 | 0.23 | 15.6 |
| TGGYRCTT      | 181 | 854  | 0.21 | 14.0 |
| >motif 33     |     |      |      |      |
| WGTAWWTATT    | 229 | 742  | 0.31 | 22.8 |
| TTGTRWnATT    | 118 | 562  | 0.21 | 11.5 |
| TGTAnnTnTTG   | 133 | 614  | 0.22 | 10.9 |
| >motif 34     |     |      |      |      |
| TTTnnnnYGTA   | 685 | 3322 | 0.21 | 22.0 |
| YTTGnAnTGTR   | 113 | 524  | 0.22 | 10.3 |
| >motif 35     |     |      |      |      |
| GTAAGTGA      | 123 | 293  | 0.42 | 21.8 |
| TACTGTAT      | 101 | 471  | 0.21 | 11.0 |
| GTAAGTGA      | 48  | 220  | 0.22 | 7.8  |
| CACGGTAC      | 6   | 26   | 0.23 | 6.6  |
| >motif 36     |     |      |      |      |
| GTTTACAG      | 135 | 359  | 0.38 | 21.1 |
| YnCTGTAA      | 503 | 2332 | 0.22 | 17.4 |
| KTTTRYAGTnW   | 124 | 613  | 0.20 | 10.1 |
| >motif 37     |     |      |      |      |
| TAATATAT      | 192 | 641  | 0.30 | 20.9 |
| YGTAnTATRW    | 126 | 532  | 0.24 | 9.2  |
| >motif 38     |     |      |      |      |
| WRCCAAAA      | 359 | 1481 | 0.24 | 20.9 |
| WRCCAAAT      | 261 | 1232 | 0.21 | 16.4 |
| AGCCAAA       | 219 | 1059 | 0.21 | 12.6 |
| >motif 39     |     |      |      |      |
| TATWTTnnTAC   | 145 | 440  | 0.33 | 20.7 |
| TATTTWnCTA    | 120 | 404  | 0.30 | 17.2 |
| TATWTTnnTAG   | 143 | 610  | 0.23 | 14.7 |
| >motif 40     |     |      |      |      |
| YGAATGTA      | 186 | 547  | 0.34 | 20.5 |
| TGAATGY       | 556 | 2622 | 0.21 | 18.2 |
| ACATTCC       | 251 | 962  | 0.26 | 17.7 |
| ACATTCCA      | 109 | 343  | 0.32 | 16.6 |
| >motif 41     |     |      |      |      |
| MAGTATT       | 688 | 3065 | 0.22 | 20.1 |
| CAGTATTA      | 112 | 347  | 0.32 | 17.0 |
| ACTACTG       | 155 | 646  | 0.24 | 12.7 |
| ACTACTGW      | 109 | 411  | 0.27 | 11.3 |
| >motif 42     |     |      |      |      |
| TTTKnnTAC     | 686 | 3330 | 0.21 | 19.9 |
| WATTTWnTAC    | 132 | 582  | 0.23 | 13.0 |
| TYGTAMnAAA    | 110 | 432  | 0.25 | 11.0 |
| GTACCAA       | 42  | 152  | 0.28 | 9.1  |
| >motif 43     |     |      |      |      |
| WRTAAATG      | 550 | 2736 | 0.20 | 19.4 |
| TGTRMATG      | 361 | 1788 | 0.20 | 17.4 |
| TGTAAnTGT     | 113 | 542  | 0.21 | 8.5  |
| >motif 44     |     |      |      |      |
| TGTAnnnTAT    | 421 | 1786 | 0.24 | 18.6 |
| TGTRnnnWATT   | 436 | 2174 | 0.20 | 17.9 |
| TTGYRnnnTATWY | 116 | 516  | 0.22 | 9.9  |
| >motif 45     |     |      |      |      |
| TGTAnnWWnTGTA | 113 | 313  | 0.36 | 18.6 |
| TGTnnnnnTTGTA | 136 | 629  | 0.22 | 11.4 |
| >motif 46     |     |      |      |      |
| TTGnAATAAA    | 126 | 411  | 0.31 | 18.2 |
| CTTnnWATAAR   | 118 | 588  | 0.20 | 12.2 |
| >motif 47     |     |      |      |      |
| CTATGCAA      | 83  | 199  | 0.42 | 17.8 |
| TTTKYRTAG     | 162 | 781  | 0.21 | 10.1 |
| >motif 48     |     |      |      |      |
| TTChnWATAAA   | 127 | 511  | 0.25 | 17.0 |
| TGTWnnnWATAWA | 142 | 620  | 0.23 | 16.0 |
| GTTnnnWRTAAA  | 142 | 659  | 0.22 | 14.9 |
| >motif 49     |     |      |      |      |
| AAGYRYCTT     | 141 | 546  | 0.26 | 16.8 |
| >motif 50     |     |      |      |      |
| ACACTAM       | 301 | 1160 | 0.26 | 16.7 |
| AACACTAM      | 125 | 434  | 0.29 | 13.0 |
| >motif 51     |     |      |      |      |
| GGACCAR       | 319 | 1565 | 0.20 | 16.7 |

|                                                                   |                          |                          |                              |                            |
|-------------------------------------------------------------------|--------------------------|--------------------------|------------------------------|----------------------------|
| >motif 52<br>CTTWRATA                                             | 325                      | 1584                     | 0.21                         | 16.4                       |
| >motif 53<br>CTATKYATT                                            | 130                      | 491                      | 0.26                         | 16.1                       |
| >motif 54<br>YGTAnAKRnTTT                                         | 112                      | 353                      | 0.32                         | 15.7                       |
| >motif 55<br>AACSRRAAG                                            | 139                      | 462                      | 0.30                         | 15.5                       |
| >motif 56<br>YACCAGCA                                             | 136                      | 536                      | 0.25                         | 15.5                       |
| >motif 57<br>CTCRnTAAA<br>YCATTAAA                                | 117<br>201               | 525<br>917               | 0.22<br>0.22                 | 15.1<br>15.0               |
| >motif 58<br>YACTGCCR                                             | 155                      | 714                      | 0.22                         | 14.9                       |
| >motif 59<br>TnTATnTGTAnR                                         | 139                      | 598                      | 0.23                         | 14.9                       |
| >motif 60<br>TGCnnWRATA                                           | 122                      | 513                      | 0.24                         | 14.8                       |
| >motif 61<br>TGTRCCAW                                             | 220                      | 988                      | 0.22                         | 14.7                       |
| >motif 62<br>TGCKRATA                                             | 128                      | 460                      | 0.28                         | 14.6                       |
| >motif 63<br>TGTnnnAWATA                                          | 128                      | 608                      | 0.21                         | 14.6                       |
| >motif 64<br>AATAWAnnTTG                                          | 110                      | 489                      | 0.22                         | 14.5                       |
| >motif 65<br>WCACYGTGM<br>ACACTGKR                                | 104<br>230               | 406<br>1149              | 0.26<br>0.20                 | 14.5<br>13.9               |
| >motif 66<br>WRATAAnnnYGTAnW<br>TKTACRnnnnTTT                     | 108<br>141               | 437<br>585               | 0.25<br>0.24                 | 14.3<br>13.0               |
| >motif 67<br>GTTWnTAT<br>CTTWnTAT                                 | 240<br>268               | 1170<br>1326             | 0.21<br>0.20                 | 14.3<br>13.2               |
| >motif 68<br>AWTAAAnnCTT<br>AWTAAAnnGTT                           | 109<br>108               | 530<br>479               | 0.21<br>0.23                 | 13.7<br>11.5               |
| >motif 69<br>TATTTWnATG                                           | 142                      | 610                      | 0.23                         | 13.7                       |
| >motif 70<br>ATAnTGTAnW<br>YGTAMAATA<br>YnTATTGTA<br>YnTACnRTATnY | 230<br>114<br>178<br>110 | 989<br>445<br>833<br>514 | 0.23<br>0.26<br>0.21<br>0.21 | 13.6<br>10.9<br>9.9<br>9.1 |
| >motif 71<br>GACAATC                                              | 103                      | 330                      | 0.31                         | 13.6                       |
| >motif 72<br>TGCRMYAAA<br>RTTTRYTGC                               | 115<br>125               | 434<br>594               | 0.26<br>0.21                 | 13.4<br>10.7               |
| >motif 73<br>TTCnAnTAAA<br>TTTCTRnnAAA                            | 117<br>116               | 553<br>570               | 0.21<br>0.20                 | 13.3<br>12.7               |
| >motif 74<br>TGCSRAAA<br>TGCSRAAG                                 | 138<br>111               | 508<br>447               | 0.27<br>0.25                 | 13.3<br>12.7               |
| >motif 75<br>TTTnnnRYCAAA                                         | 128                      | 616                      | 0.21                         | 12.8                       |
| >motif 76<br>TTGKAWTTAW                                           | 117                      | 480                      | 0.24                         | 12.8                       |
| >motif 77<br>AATRMAnTGT<br>YAATRnACTnK                            | 165<br>119               | 823<br>571               | 0.20<br>0.21                 | 12.8<br>9.9                |
| >motif 78<br>ATACGGGT                                             | 9                        | 19                       | 0.47                         | 12.3                       |
| >motif 79<br>YYGCACTA<br>TTGMRCTA<br>TTTKYRCTA                    | 116<br>133<br>136        | 400<br>584<br>655        | 0.29<br>0.23<br>0.21         | 12.1<br>10.5<br>9.8        |



|                |     |     |      |      |
|----------------|-----|-----|------|------|
| >motif 80      |     |     |      |      |
| ATGYACTKY      | 147 | 625 | 0.24 | 12.0 |
| ATGTACWG       | 134 | 586 | 0.23 | 7.7  |
| >motif 81      |     |     |      |      |
| TTTCAATA       | 105 | 464 | 0.23 | 11.9 |
| GTTnYAATA      | 106 | 513 | 0.21 | 8.4  |
| >motif 82      |     |     |      |      |
| TCTRTRnATA     | 124 | 531 | 0.23 | 11.9 |
| TCTRnWTAT      | 135 | 653 | 0.21 | 11.0 |
| >motif 83      |     |     |      |      |
| AATMWAGTT      | 117 | 577 | 0.20 | 11.9 |
| WATAAMGTT      | 108 | 499 | 0.22 | 10.1 |
| >motif 84      |     |     |      |      |
| TGTRYMAATR     | 113 | 482 | 0.23 | 11.8 |
| GTGnAATW       | 187 | 911 | 0.21 | 11.0 |
| >motif 85      |     |     |      |      |
| YAATRWAGC      | 106 | 488 | 0.22 | 11.7 |
| ATGTAGCA       | 54  | 224 | 0.24 | 9.1  |
| TGCTGCAT       | 69  | 328 | 0.21 | 8.9  |
| >motif 86      |     |     |      |      |
| TTGTKKACA      | 112 | 457 | 0.25 | 11.7 |
| TGTTKMCAA      | 110 | 479 | 0.23 | 11.1 |
| >motif 87      |     |     |      |      |
| AGAnTATTWW     | 127 | 632 | 0.20 | 11.5 |
| >motif 88      |     |     |      |      |
| AGAKnTnTATW    | 120 | 582 | 0.21 | 11.2 |
| >motif 89      |     |     |      |      |
| GTGCnATT       | 156 | 676 | 0.23 | 10.8 |
| >motif 90      |     |     |      |      |
| WKTACWnKAAA    | 116 | 580 | 0.20 | 10.6 |
| WTTTnTKGTAM    | 113 | 532 | 0.21 | 8.8  |
| >motif 91      |     |     |      |      |
| TGTWnAnAGC     | 115 | 572 | 0.20 | 10.3 |
| TGTAnAnAGA     | 115 | 502 | 0.23 | 9.8  |
| >motif 92      |     |     |      |      |
| YRAAGYnTTA     | 123 | 606 | 0.20 | 9.9  |
| >motif 93      |     |     |      |      |
| YYGTAnnnnKATT  | 108 | 514 | 0.21 | 9.7  |
| >motif 94      |     |     |      |      |
| YACARTnTTT     | 120 | 590 | 0.20 | 9.5  |
| >motif 95      |     |     |      |      |
| GTTGTAnA       | 191 | 927 | 0.21 | 9.5  |
| >motif 96      |     |     |      |      |
| GGTACGAA       | 8   | 25  | 0.32 | 9.3  |
| >motif 97      |     |     |      |      |
| ATAYGCAR       | 114 | 555 | 0.21 | 9.2  |
| >motif 98      |     |     |      |      |
| TATTKnnnnGTAnW | 110 | 545 | 0.20 | 9.2  |
| >motif 99      |     |     |      |      |
| TCGCATGA       | 6   | 17  | 0.35 | 8.5  |
| TCGCATGG       | 5   | 19  | 0.26 | 6.5  |
| >motif 100     |     |     |      |      |
| CTTRYRnATA     | 111 | 513 | 0.22 | 8.4  |
| CTTKYGTAW      | 128 | 621 | 0.21 | 8.3  |
| >motif 101     |     |     |      |      |
| GTCAATAA       | 49  | 214 | 0.23 | 8.2  |
| >motif 102     |     |     |      |      |
| TAACGGGT       | 5   | 14  | 0.36 | 7.8  |
| >motif 103     |     |     |      |      |
| TRTAAAnTAC     | 116 | 574 | 0.20 | 7.5  |
| >motif 104     |     |     |      |      |
| CGCAAAAA       | 6   | 23  | 0.26 | 7.1  |
| >motif 105     |     |     |      |      |
| AAGGGCTA       | 33  | 138 | 0.24 | 7.1  |
| >motif 106     |     |     |      |      |
| GGCAGCTA       | 33  | 142 | 0.23 | 6.9  |

Supplementary Table S5 **Conserved 8-mer motifs discovered in 3' UTR**

| Motif      | Conserved num | Total num | Conservation rate | MCS  | matched miRNA                                           |
|------------|---------------|-----------|-------------------|------|---------------------------------------------------------|
| >cluster_1 | GTGCAATA      |           |                   |      |                                                         |
| GTGCAATA   | 160           | 291       | 0.55              | 30.6 | miR-92 miR-32 MIR200 MIR256                             |
| AAGCAATA   | 145           | 386       | 0.38              | 22.3 | miR-137                                                 |
| TGTGCAAT   | 134           | 377       | 0.36              | 20.6 | MIR200                                                  |
| AGTGCAAT   | 90            | 273       | 0.33              | 15.9 | miR-367 miR-25 MIR1 MIR228 MIR252 MIR256                |
| ATGCAATA   | 85            | 294       | 0.29              | 13.8 | miR-217(#3)                                             |
| GGTGCAAT   | 33            | 116       | 0.28              | 8.5  |                                                         |
| AGCAATAG   | 49            | 183       | 0.27              | 9.8  |                                                         |
| AAGTGCAA   | 81            | 306       | 0.27              | 12.5 |                                                         |
| TGCAATAT   | 90            | 344       | 0.26              | 13.1 |                                                         |
| GTGCAATT   | 62            | 240       | 0.26              | 10.7 | MIR173 MIR228                                           |
| TAGCAATA   | 60            | 234       | 0.26              | 10.5 | MIR189 MIR210                                           |
| GAGCAATA   | 41            | 163       | 0.25              | 8.5  |                                                         |
| CAGCAATA   | 66            | 262       | 0.25              | 10.8 |                                                         |
| GTGCAATG   | 46            | 183       | 0.25              | 9.0  |                                                         |
| TTGCAATA   | 80            | 321       | 0.25              | 11.8 | MIR45 MIR166 MIR216                                     |
| AGCAATAT   | 65            | 263       | 0.25              | 10.5 |                                                         |
| GTGCAATC   | 22            | 91        | 0.24              | 6.0  |                                                         |
| TATGCAAT   | 70            | 296       | 0.24              | 10.5 |                                                         |
| TTGTGCAA   | 77            | 329       | 0.23              | 10.9 | MIR200                                                  |
| TGCAATAG   | 40            | 171       | 0.23              | 7.8  | MIR216                                                  |
| TGCAATAC   | 38            | 164       | 0.23              | 7.6  |                                                         |
| GCAATATT   | 65            | 291       | 0.22              | 9.5  |                                                         |
| AGCAATAC   | 33            | 154       | 0.21              | 6.5  |                                                         |
| GCAATACT   | 31            | 146       | 0.21              | 6.2  |                                                         |
| TGGCAATA   | 44            | 235       | 0.19              | 6.5  | MIR150                                                  |
| >cluster_2 | GTGCCTTA      |           |                   |      |                                                         |
| GTGCCTTA   | 147           | 271       | 0.54              | 29.1 | miR-124a                                                |
| AGTGCCTT   | 227           | 473       | 0.48              | 33.3 |                                                         |
| AAGTGCCT   | 196           | 430       | 0.46              | 29.8 | MIR63                                                   |
| TGCCTTAA   | 186           | 409       | 0.46              | 29.0 |                                                         |
| AGCCTTAA   | 113           | 295       | 0.38              | 20.0 |                                                         |
| GTGCCTTG   | 133           | 355       | 0.38              | 21.3 | miR-224(#3)                                             |
| GTGCCTTT   | 179           | 482       | 0.37              | 24.6 |                                                         |
| TGTGCCTT   | 228           | 620       | 0.37              | 27.5 | MIR157 MIR182                                           |
| CGCCTTAA   | 14            | 38        | 0.37              | 13.5 |                                                         |
| GCCTTAAT   | 84            | 238       | 0.35              | 16.2 |                                                         |
| ATGCCTTA   | 90            | 258       | 0.35              | 16.6 |                                                         |
| GGCCTTAA   | 52            | 160       | 0.33              | 11.9 |                                                         |
| GCCTTAAA   | 102           | 314       | 0.33              | 16.7 |                                                         |
| GCCTTAAG   | 56            | 183       | 0.31              | 11.8 |                                                         |
| TTGCCTTA   | 122           | 401       | 0.30              | 17.3 |                                                         |
| AAGCCTTA   | 79            | 264       | 0.30              | 13.7 |                                                         |
| GTGCCTTC   | 107           | 361       | 0.30              | 15.9 | MIR157                                                  |
| GGTGCCTT   | 82            | 281       | 0.29              | 13.7 |                                                         |
| GCCTTAAC   | 48            | 165       | 0.29              | 10.5 |                                                         |
| CTGCCTTA   | 108           | 371       | 0.29              | 15.7 |                                                         |
| TGCCTTAC   | 63            | 220       | 0.29              | 11.8 |                                                         |
| TAGTGCCT   | 59            | 209       | 0.28              | 11.3 |                                                         |
| TCGCCTTA   | 10            | 37        | 0.27              | 9.5  |                                                         |
| TGCCTTAT   | 99            | 384       | 0.26              | 13.5 |                                                         |
| CGCCTTAT   | 6             | 24        | 0.25              | 7.0  | miR-208(#3)                                             |
| GAGCCTTA   | 43            | 174       | 0.25              | 8.6  |                                                         |
| TGCCTTAG   | 70            | 288       | 0.24              | 10.7 |                                                         |
| TGGCCTTA   | 59            | 250       | 0.24              | 9.6  |                                                         |
| GCCTTATT   | 65            | 293       | 0.22              | 9.5  |                                                         |
| AGTGCCTA   | 41            | 185       | 0.22              | 7.5  | miR-34b(#3)                                             |
| AGTGCCTG   | 95            | 434       | 0.22              | 11.3 |                                                         |
| GCCTTACT   | 36            | 172       | 0.21              | 6.6  | MIR123                                                  |
| GTTGCCTT   | 66            | 319       | 0.21              | 8.9  |                                                         |
| ACGCCTTA   | 6             | 29        | 0.21              | 6.2  |                                                         |
| TAGCCTTA   | 33            | 162       | 0.20              | 6.2  | miR-9*(#3)                                              |
| TTGTGCCT   | 93            | 464       | 0.20              | 10.2 |                                                         |
| AGTGCCTC   | 54            | 270       | 0.20              | 7.7  | MIR63 MIR182                                            |
| CAGTGCCT   | 102           | 512       | 0.20              | 10.6 | miR-34c(#3)                                             |
| AATGCCTT   | 90            | 452       | 0.20              | 9.9  | MIR240                                                  |
| TGCCTTGC   | 62            | 336       | 0.19              | 7.6  | miR-330(#3)                                             |
| ATGTGCCT   | 64            | 353       | 0.18              | 7.5  |                                                         |
| TGCCTTGA   | 63            | 350       | 0.18              | 7.4  | MIR77                                                   |
| >cluster_3 | CTACCTCA      |           |                   |      |                                                         |
| CTACCTCA   | 139           | 263       | 0.53              | 27.8 | miR-98 let-7i let-7g let-7f let-7e let-7c let-7b let-7a |
| ATACCTCA   | 97            | 240       | 0.40              | 19.3 | MIR207                                                  |
| ACTACCTC   | 63            | 160       | 0.39              | 15.2 | let-7d                                                  |
| TCTACCTC   | 97            | 256       | 0.38              | 18.4 |                                                         |
| TTACCTCA   | 99            | 262       | 0.38              | 18.5 | MIR250                                                  |
| TACCTCAG   | 96            | 283       | 0.34              | 16.8 |                                                         |
| CTACCTCT   | 96            | 284       | 0.34              | 16.7 | MIR26                                                   |
| CCTACCTC   | 88            | 276       | 0.32              | 15.3 | MIR26                                                   |
| TACCTCAA   | 59            | 186       | 0.32              | 12.5 | MIR250                                                  |
| GCTACCTC   | 48            | 152       | 0.32              | 11.2 |                                                         |
| AATACCTC   | 55            | 176       | 0.31              | 11.9 | MIR8                                                    |
| TACCTCAC   | 58            | 187       | 0.31              | 12.1 |                                                         |
| ATTACCTC   | 40            | 156       | 0.26              | 8.5  |                                                         |
| TACCTCAT   | 58            | 239       | 0.24              | 9.8  |                                                         |
| CTACCTCC   | 54            | 243       | 0.22              | 8.6  |                                                         |
| AACTACCT   | 43            | 194       | 0.22              | 7.7  | miR-196b miR-196a                                       |
| TTTACCTC   | 65            | 298       | 0.22              | 9.3  |                                                         |
| TATACCTC   | 35            | 161       | 0.22              | 6.8  |                                                         |
| TACCTCTT   | 61            | 295       | 0.21              | 8.5  |                                                         |
| CTACCTCG   | 10            | 50        | 0.20              | 7.9  |                                                         |

|            |          |     |      |      |                                               |
|------------|----------|-----|------|------|-----------------------------------------------|
| TACCTCGG   | 7        | 36  | 0.19 | 6.5  |                                               |
| >cluster_4 | ACCAAAGA |     |      |      |                                               |
| ACCAAAGA   | 178      | 366 | 0.49 | 29.7 | miR-9 MIR170 MIR188                           |
| AACCAAAG   | 161      | 412 | 0.39 | 24.2 | MIR188                                        |
| TACCAAAG   | 98       | 259 | 0.38 | 18.4 | MIR134 MIR170                                 |
| GCCAAAGA   | 112      | 299 | 0.38 | 19.6 | MIR221                                        |
| GACCAAAG   | 97       | 270 | 0.36 | 17.6 |                                               |
| GGACCAA    | 82       | 256 | 0.32 | 14.8 |                                               |
| TGCCAAAG   | 125      | 393 | 0.32 | 18.2 | MIR164                                        |
| CCAAAGAT   | 100      | 337 | 0.30 | 15.4 |                                               |
| ACCAAAGT   | 85       | 306 | 0.28 | 13.4 |                                               |
| TGACCAA    | 97       | 356 | 0.27 | 14.1 |                                               |
| ACCAAAGC   | 74       | 273 | 0.27 | 12.2 |                                               |
| GTACCAA    | 50       | 187 | 0.27 | 9.9  | MIR134                                        |
| CCAAAGAC   | 79       | 302 | 0.26 | 12.2 |                                               |
| CCAAAGAA   | 116      | 443 | 0.26 | 14.8 | MIR170                                        |
| TCCAAAGA   | 111      | 427 | 0.26 | 14.4 |                                               |
| GACCAAAA   | 77       | 297 | 0.26 | 12.0 | MIR122                                        |
| ACCAAAGG   | 74       | 290 | 0.26 | 11.6 | MIR56                                         |
| AGACCAA    | 82       | 327 | 0.25 | 12.0 |                                               |
| CACCAAAG   | 72       | 296 | 0.24 | 10.9 | MIR56                                         |
| AGCCAAAG   | 84       | 354 | 0.24 | 11.5 | MIR221                                        |
| TAACCAA    | 74       | 325 | 0.23 | 10.4 |                                               |
| GAACCAA    | 71       | 315 | 0.23 | 10.1 | MIR140                                        |
| ACCAAATA   | 75       | 337 | 0.22 | 10.2 |                                               |
| GACCAAAT   | 56       | 263 | 0.21 | 8.4  |                                               |
| AAACCAA    | 155      | 726 | 0.21 | 14.1 | MIR143                                        |
| GCCAAAGT   | 51       | 241 | 0.21 | 8.0  |                                               |
| CCAAAGAG   | 81       | 390 | 0.21 | 9.9  |                                               |
| ACCAAAAA   | 109      | 524 | 0.21 | 11.5 |                                               |
| GCCAAAGC   | 47       | 237 | 0.20 | 7.1  |                                               |
| CCAAAGTT   | 65       | 330 | 0.20 | 8.3  |                                               |
| TTACCAA    | 77       | 393 | 0.20 | 9.0  | MIR228                                        |
| ATACCAA    | 56       | 290 | 0.19 | 7.6  | MIR170 MIR245                                 |
| AACCAAAT   | 74       | 390 | 0.19 | 8.5  |                                               |
| AACCAAAA   | 100      | 544 | 0.18 | 9.5  |                                               |
| >cluster_5 | TGTTTACA |     |      |      |                                               |
| TGTTTACA   | 369      | 771 | 0.48 | 42.3 | miR-30e-5p miR-30d miR-30c miR-30b miR-30a-5p |
| GTTTACAT   | 167      | 441 | 0.38 | 24.1 | MIR183 MIR257                                 |
| GTTTACAG   | 146      | 406 | 0.36 | 21.6 |                                               |
| GTTTACAA   | 134      | 400 | 0.34 | 19.6 |                                               |
| TTGTTTAC   | 160      | 501 | 0.32 | 20.6 | MIR225                                        |
| ATGTTTAC   | 147      | 465 | 0.32 | 19.6 |                                               |
| AGTTTACA   | 112      | 382 | 0.29 | 16.1 |                                               |
| GTTTACAC   | 45       | 179 | 0.25 | 8.9  |                                               |
| CGTTTACA   | 18       | 74  | 0.24 | 11.9 |                                               |
| AAGTTTAC   | 70       | 292 | 0.24 | 10.6 |                                               |
| GGTTTACA   | 46       | 198 | 0.23 | 8.3  | MIR214                                        |
| ACGTTTAC   | 13       | 56  | 0.23 | 9.9  |                                               |
| CTGTTTAC   | 87       | 383 | 0.23 | 11.2 | MIR183                                        |
| CCGTTTAC   | 8        | 42  | 0.19 | 6.8  |                                               |
| TGTTTACT   | 102      | 544 | 0.19 | 9.9  | MIR225                                        |
| CAGTTTAC   | 41       | 221 | 0.19 | 6.2  |                                               |
| GTGTTTAC   | 53       | 289 | 0.18 | 6.9  | MIR257                                        |
| >cluster_6 | GCACTTTA |     |      |      |                                               |
| GCACTTTA   | 193      | 405 | 0.48 | 30.5 | miR-20 miR-106b miR-18(#2)                    |
| TGCACTTT   | 244      | 596 | 0.41 | 30.8 |                                               |
| AGCACTTT   | 190      | 601 | 0.32 | 22.3 | miR-93 miR-372 miR-17-5p miR-106a MIR103      |
| TTGCACTT   | 145      | 464 | 0.31 | 19.3 |                                               |
| GCACTTTG   | 119      | 398 | 0.30 | 16.9 | MIR103                                        |
| ATGCACTT   | 82       | 302 | 0.27 | 12.9 |                                               |
| GCACTTTT   | 118      | 440 | 0.27 | 15.3 |                                               |
| AAGCACTT   | 123      | 483 | 0.26 | 14.9 | miR-302d miR-302c miR-302b miR-302a miR-373   |
| TGCACTTA   | 59       | 248 | 0.24 | 9.7  |                                               |
| GGCACTTT   | 64       | 276 | 0.23 | 9.8  |                                               |
| CTGCACTT   | 80       | 374 | 0.21 | 10.1 | MIR209                                        |
| CACTTTAT   | 84       | 413 | 0.20 | 9.8  |                                               |
| GTGCACTT   | 47       | 237 | 0.20 | 7.1  | MIR153 MIR186                                 |
| GCACTTTC   | 57       | 290 | 0.20 | 7.8  |                                               |
| CACTTTAA   | 77       | 418 | 0.18 | 8.4  |                                               |
| >cluster_7 | TGGTGCTA |     |      |      |                                               |
| TGGTGCTA   | 116      | 272 | 0.43 | 21.9 | miR-29c miR-29b miR-29a MIR196                |
| GGTGCTAA   | 74       | 180 | 0.41 | 17.0 |                                               |
| GGTGCTAT   | 59       | 167 | 0.35 | 13.6 |                                               |
| AGGTGCTA   | 63       | 192 | 0.33 | 13.2 |                                               |
| ATGGTGCT   | 108      | 343 | 0.32 | 16.8 | miR-107(#3) miR-103(#3) MIR139                |
| GGTGCTAG   | 44       | 142 | 0.31 | 10.6 |                                               |
| GGTGCTAC   | 31       | 108 | 0.29 | 8.3  |                                               |
| TTGGTGCT   | 114      | 408 | 0.28 | 15.6 |                                               |
| TGGTGCTT   | 112      | 417 | 0.27 | 14.9 |                                               |
| AAGGTGCT   | 76       | 299 | 0.25 | 11.7 |                                               |
| GGTGCTTT   | 85       | 340 | 0.25 | 12.2 |                                               |
| TGGTGCTC   | 66       | 266 | 0.25 | 10.6 |                                               |
| CGGTGCTA   | 9        | 37  | 0.24 | 8.4  |                                               |
| AATGGTGC   | 57       | 235 | 0.24 | 9.7  |                                               |
| CTGGTGCT   | 107      | 449 | 0.24 | 13.0 | MIR196 MIR198                                 |
| TGGTGCTG   | 118      | 525 | 0.23 | 12.9 | MIR24 MIR198                                  |
| GTGCTATT   | 48       | 238 | 0.20 | 7.4  |                                               |
| TTGGTGC    | 62       | 317 | 0.20 | 8.1  |                                               |
| GTGCTAAA   | 47       | 240 | 0.20 | 7.0  | MIR194                                        |

|             |            |     |      |      |                             |
|-------------|------------|-----|------|------|-----------------------------|
| ATTGGTGC    | 29         | 148 | 0.20 | 5.5  | MIR219                      |
| GGTGCTGA    | 56         | 287 | 0.20 | 7.7  | MIR198                      |
| GGTGCTTG    | 39         | 208 | 0.19 | 6.1  |                             |
| GGTGCTGT    | 66         | 354 | 0.19 | 7.9  |                             |
| >cluster_8  | CTATGCAA   |     |      |      |                             |
| CTATGCAA    | 97         | 231 | 0.42 | 19.8 | miR-153 MIR246              |
| ACTATGCA    | 57         | 183 | 0.31 | 12.1 |                             |
| TCTATGCA    | 63         | 223 | 0.28 | 11.7 | MIR246                      |
| CTATGCA     | 44         | 169 | 0.26 | 9.1  |                             |
| TATGCAAA    | 112        | 446 | 0.25 | 14.0 | MIR239 MIR242 MIR248 MIR255 |
| GCTATGCA    | 36         | 146 | 0.25 | 7.8  | MIR224 MIR226               |
| ATATGCAA    | 84         | 344 | 0.24 | 11.8 | MIR41 MIR239 MIR248 MIR255  |
| TTATGCAA    | 67         | 309 | 0.22 | 9.4  | MIR242                      |
| TATGCATG    | 50         | 238 | 0.21 | 7.8  | MIR74                       |
| TATGCACT    | 46         | 220 | 0.21 | 7.5  |                             |
| TTTATGCA    | 85         | 432 | 0.20 | 9.5  |                             |
| >cluster_9  | TACTTGAA   |     |      |      |                             |
| TACTTGAA    | 178        | 425 | 0.42 | 26.8 | miR-26b miR-26a MIR243      |
| ATACTTGA    | 105        | 316 | 0.33 | 17.3 |                             |
| ACTTGAAT    | 134        | 461 | 0.29 | 17.5 |                             |
| TTACTTGA    | 82         | 315 | 0.26 | 12.4 | MIR243                      |
| AACTTGAA    | 131        | 536 | 0.24 | 14.8 | MIR104 MIR249               |
| ACTTGAAC    | 53         | 222 | 0.24 | 9.2  | MIR131                      |
| ACTTGAAA    | 124        | 614 | 0.20 | 11.8 |                             |
| AAACTTGA    | 106        | 526 | 0.20 | 10.9 |                             |
| GTACTTGA    | 39         | 196 | 0.20 | 6.5  |                             |
| CACTTGAA    | 64         | 338 | 0.19 | 7.9  | MIR131                      |
| >cluster_10 | CGCAAAAA   |     |      |      |                             |
| CGCAAAAA    | 17         | 41  | 0.42 | 16.0 | MIR161 MIR178               |
| GCCAAAAA    | 82         | 362 | 0.23 | 10.9 |                             |
| >cluster_11 | GTGCCAAA   |     |      |      |                             |
| GTGCCAAA    | 118        | 291 | 0.41 | 21.3 | miR-96 MIR217               |
| TTGCCAAA    | 172        | 521 | 0.33 | 22.0 | miR-182 MIR48 MIR253        |
| AGTGCCAA    | 84         | 255 | 0.33 | 15.3 | MIR217                      |
| TGTGCCAA    | 109        | 351 | 0.31 | 16.6 | MIR108 MIR206               |
| TGCCAAAA    | 148        | 480 | 0.31 | 19.3 | MIR205                      |
| AAGTGCCA    | 92         | 305 | 0.30 | 14.9 | MIR196                      |
| ATGCCAAA    | 103        | 351 | 0.29 | 15.4 | MIR204                      |
| GTGCCAAT    | 40         | 142 | 0.28 | 9.3  | MIR108 MIR206               |
| TGCCAAAT    | 110        | 411 | 0.27 | 14.7 | MIR19 MIR48 MIR79 MIR199    |
| GTGCCATA    | 41         | 170 | 0.24 | 8.2  | miR-183 MIR87               |
| TGCCAAAC    | 62         | 262 | 0.24 | 9.9  |                             |
| CTGCCAAA    | 88         | 384 | 0.23 | 11.4 | MIR19 MIR79 MIR164          |
| GTGCCAAG    | 62         | 273 | 0.23 | 9.5  |                             |
| GGTGCCAA    | 42         | 189 | 0.22 | 7.6  |                             |
| GTGCCATT    | 61         | 277 | 0.22 | 9.1  | MIR3                        |
| TTTGCCAA    | 109        | 506 | 0.22 | 11.9 |                             |
| GCCAAATA    | 53         | 254 | 0.21 | 8.0  | MIR48                       |
| ATTGCCAA    | 60         | 301 | 0.20 | 8.1  | MIR48 MIR237 MIR253         |
| AAGCCAAA    | 97         | 489 | 0.20 | 10.3 | MIR131                      |
| GCCAAACT    | 39         | 202 | 0.19 | 6.3  |                             |
| AATGCCAA    | 68         | 353 | 0.19 | 8.3  |                             |
| GTTGCCAA    | 43         | 225 | 0.19 | 6.6  |                             |
| TGCCAATA    | 40         | 214 | 0.19 | 6.2  |                             |
| GCCAAATT    | 49         | 263 | 0.19 | 6.8  |                             |
| >cluster_12 | GTA CTGTGA |     |      |      |                             |
| GTA CTGTGA  | 136        | 338 | 0.40 | 22.7 | miR-101                     |
| TACTGTGA    | 99         | 354 | 0.28 | 14.5 | MIR233                      |
| TACTGTAA    | 126        | 461 | 0.27 | 16.1 |                             |
| TGTACTGT    | 129        | 506 | 0.26 | 15.3 |                             |
| CTACTGTA    | 69         | 283 | 0.24 | 10.7 | miR-199a*                   |
| TACTGTAC    | 63         | 274 | 0.23 | 9.7  | MIR184                      |
| ACACTGTA    | 64         | 289 | 0.22 | 9.4  |                             |
| ACTACTGT    | 59         | 268 | 0.22 | 9.0  |                             |
| AGTACTGT    | 58         | 267 | 0.22 | 8.8  |                             |
| ACTGTAAA    | 122        | 572 | 0.21 | 12.5 |                             |
| GGTACTGT    | 36         | 172 | 0.21 | 6.6  |                             |
| GTA CTGTG   | 55         | 265 | 0.21 | 8.1  |                             |
| TACTGTAT    | 108        | 530 | 0.20 | 11.2 |                             |
| ACTGTACA    | 72         | 359 | 0.20 | 9.0  |                             |
| ACTGTATA    | 81         | 416 | 0.20 | 9.2  |                             |
| ATA CTGTGA  | 80         | 420 | 0.19 | 8.9  | miR-144                     |
| TACTGTAG    | 47         | 254 | 0.19 | 6.6  |                             |
| TTGTA CTG   | 69         | 375 | 0.18 | 7.9  |                             |
| >cluster_13 | ATACGGGT   |     |      |      |                             |
| ATACGGGT    | 10         | 25  | 0.40 | 11.9 |                             |
| TACGGGTT    | 8          | 21  | 0.38 | 10.4 | miR-99a miR-100 miR-99b(#3) |
| TACGGGTA    | 7          | 19  | 0.37 | 9.5  |                             |
| TTACGGGT    | 9          | 29  | 0.31 | 9.8  |                             |
| ACGGGTTT    | 8          | 44  | 0.18 | 6.6  |                             |
| >cluster_14 | AAGCACAA   |     |      |      |                             |
| AAGCACAA    | 157        | 393 | 0.40 | 24.3 | miR-218 MIR113 MIR197       |
| TTGCACAA    | 81         | 315 | 0.26 | 12.2 | MIR200                      |
| AAAGCACA    | 134        | 521 | 0.26 | 15.7 | MIR148 MIR197               |
| AGCACAAT    | 62         | 244 | 0.25 | 10.5 |                             |

|             |          |     |      |      |                                         |
|-------------|----------|-----|------|------|-----------------------------------------|
| TAGCACA     | 44       | 194 | 0.23 | 8.0  |                                         |
| AGCACA      | 80       | 371 | 0.22 | 10.2 | MIR113 MIR203                           |
| AGCACA      | 34       | 162 | 0.21 | 6.5  | MIR166 MIR210                           |
| GAAGCACA    | 63       | 305 | 0.21 | 8.7  |                                         |
| CAAGCACA    | 57       | 291 | 0.20 | 7.8  | MIR113 MIR165                           |
| TAAGCACA    | 41       | 224 | 0.18 | 6.1  |                                         |
| AGCACAAG    | 48       | 265 | 0.18 | 6.5  |                                         |
|             |          |     |      |      |                                         |
| >cluster_15 | TTTGC    |     |      |      |                                         |
| TTTGC       | 209      | 559 | 0.37 | 26.7 |                                         |
| TTGCA       | 89       | 244 | 0.37 | 17.1 |                                         |
| TTGCACA     | 207      | 583 | 0.36 | 25.5 | miR-19b miR-19a                         |
| TTGCATG     | 158      | 456 | 0.35 | 21.9 | MIR108                                  |
| TTTTGCAC    | 167      | 513 | 0.33 | 21.4 | MIR208                                  |
| TTGCACTG    | 110      | 399 | 0.28 | 15.1 | miR-301 miR-130b miR-130a MIR185 MIR228 |
| GTTGCAC     | 66       | 248 | 0.27 | 11.3 |                                         |
| ATTTGCAC    | 99       | 375 | 0.26 | 13.8 |                                         |
| TTGCACGA    | 9        | 35  | 0.26 | 8.7  |                                         |
| TGCACTGA    | 103      | 403 | 0.26 | 13.7 | miR-152 miR-148b miR-148a MIR238        |
| TTGCACAT    | 93       | 371 | 0.25 | 12.8 |                                         |
| TGCACTAA    | 53       | 213 | 0.25 | 9.6  | MIR5                                    |
| TGCACTAC    | 29       | 122 | 0.24 | 6.8  |                                         |
| TTTGCACG    | 19       | 81  | 0.24 | 12.0 |                                         |
| TGCACTAT    | 44       | 195 | 0.23 | 7.9  |                                         |
| ATTGCAC     | 57       | 262 | 0.22 | 8.7  | MIR24 MIR71 MIR228                      |
| TTGCACGT    | 13       | 60  | 0.22 | 9.4  |                                         |
| TGCACTGT    | 90       | 418 | 0.22 | 10.8 | miR-139 MIR228                          |
| GTTGCAC     | 38       | 194 | 0.20 | 6.3  |                                         |
| AATGCAC     | 56       | 285 | 0.20 | 7.7  |                                         |
| ATGCAC      | 56       | 301 | 0.19 | 7.2  | MIR226                                  |
| AATTGCAC    | 42       | 228 | 0.18 | 6.2  | MIR201                                  |
| TTGCACAG    | 63       | 347 | 0.18 | 7.5  |                                         |
|             |          |     |      |      |                                         |
| >cluster_16 | TGTACA   |     |      |      |                                         |
| TGTACA      | 276      | 762 | 0.36 | 29.9 |                                         |
| TGTACA      | 178      | 523 | 0.34 | 22.9 |                                         |
| TGTACAG     | 176      | 524 | 0.34 | 22.5 |                                         |
| TTGTACAG    | 156      | 483 | 0.32 | 20.6 |                                         |
| TTGTACA     | 236      | 771 | 0.31 | 24.2 |                                         |
| TGTACATT    | 162      | 590 | 0.28 | 18.3 |                                         |
| ATGTACAG    | 93       | 363 | 0.26 | 13.0 |                                         |
| TTGTACAT    | 160      | 641 | 0.25 | 16.7 |                                         |
| CTGTACAG    | 90       | 371 | 0.24 | 12.2 |                                         |
| TTGTACAA    | 99       | 430 | 0.23 | 12.1 |                                         |
| GTTGTACA    | 53       | 230 | 0.23 | 8.9  |                                         |
| CTTGTACA    | 64       | 293 | 0.22 | 9.2  |                                         |
| TGTACAAA    | 105      | 484 | 0.22 | 11.8 |                                         |
| GTACATAA    | 60       | 279 | 0.22 | 8.8  |                                         |
| CTGTACAT    | 94       | 437 | 0.22 | 11.0 |                                         |
| AATGTACA    | 101      | 493 | 0.21 | 10.9 |                                         |
| GTACATT     | 107      | 525 | 0.20 | 11.1 |                                         |
| GTGTACAG    | 48       | 237 | 0.20 | 7.4  |                                         |
| GTACATTA    | 40       | 199 | 0.20 | 6.7  |                                         |
| GTACATAG    | 46       | 232 | 0.20 | 7.1  | MIR167                                  |
| TATGTACA    | 82       | 422 | 0.19 | 9.2  |                                         |
| ATGTACAT    | 101      | 528 | 0.19 | 10.1 |                                         |
| TGTACAAT    | 67       | 364 | 0.18 | 7.8  |                                         |
| GTACATAT    | 66       | 362 | 0.18 | 7.7  |                                         |
| TCTGTACA    | 76       | 419 | 0.18 | 8.2  |                                         |
|             |          |     |      |      |                                         |
| >cluster_17 | AAGCCATA |     |      |      |                                         |
| AAGCCATA    | 92       | 261 | 0.35 | 16.9 | miR-135b miR-135a                       |
| AAAGCCAT    | 108      | 438 | 0.25 | 13.5 |                                         |
| AAGCCATG    | 72       | 321 | 0.22 | 10.1 |                                         |
| GAAGCCAT    | 67       | 334 | 0.20 | 8.6  |                                         |
| AGCCATAA    | 35       | 177 | 0.20 | 6.1  |                                         |
|             |          |     |      |      |                                         |
| >cluster_18 | ACTGTGAA |     |      |      |                                         |
| ACTGTGAA    | 192      | 551 | 0.35 | 24.2 | miR-27b miR-27a MIR192                  |
| CACTGTGA    | 132      | 414 | 0.32 | 18.7 | miR-128b miR-128a MIR192                |
| TGTGAATA    | 128      | 498 | 0.26 | 15.3 |                                         |
| AACTGTGA    | 111      | 450 | 0.25 | 13.7 |                                         |
| AATGTGAA    | 207      | 872 | 0.24 | 18.1 | miR-23b(#1) miR-23a(#1)                 |
| GCTGTGAA    | 91       | 411 | 0.22 | 11.2 | MIR177                                  |
| CTGTGAAT    | 107      | 484 | 0.22 | 12.1 |                                         |
| ACTGTGAT    | 77       | 370 | 0.21 | 9.6  | MIR233                                  |
| ACACTGTG    | 84       | 407 | 0.21 | 10.0 | MIR21                                   |
| TTTGAAT     | 122      | 626 | 0.20 | 11.2 |                                         |
| TCACTGTG    | 101      | 522 | 0.19 | 10.2 |                                         |
| CTGTGAAA    | 122      | 643 | 0.19 | 10.9 |                                         |
| TCTGTGAA    | 114      | 603 | 0.19 | 10.5 |                                         |
| ACTGTGAC    | 52       | 285 | 0.18 | 6.8  | MIR247                                  |
|             |          |     |      |      |                                         |
| >cluster_19 | AGACAATC |     |      |      |                                         |
| AGACAATC    | 44       | 134 | 0.33 | 11.1 |                                         |
| TGACAATC    | 41       | 130 | 0.32 | 10.3 | MIR149 MIR218                           |
| GACAATCA    | 46       | 155 | 0.30 | 10.4 | miR-219 MIR149                          |
| GTACAATC    | 20       | 78  | 0.26 | 6.0  |                                         |
| GACAATCT    | 31       | 121 | 0.26 | 7.5  |                                         |
| TACAATCA    | 33       | 155 | 0.21 | 6.5  |                                         |
| ACAATCAT    | 40       | 207 | 0.19 | 6.4  |                                         |
|             |          |     |      |      |                                         |
| >cluster_20 | TGCTGCTA |     |      |      |                                         |

|           |     |     |      |      |                                       |
|-----------|-----|-----|------|------|---------------------------------------|
| TGCTGCTA  | 124 | 380 | 0.33 | 18.5 | miR-195 miR-16 miR-15b miR-15a MIR117 |
| GCTGCTAA  | 60  | 223 | 0.27 | 10.9 |                                       |
| GCTGCTAT  | 69  | 262 | 0.26 | 11.5 | MIR56                                 |
| ATGCTGCA  | 75  | 332 | 0.23 | 10.4 | miR-338(#3)                           |
| TTGCTGCT  | 145 | 664 | 0.22 | 13.9 | miR-424 MIR116 MIR117                 |
| TGCTGCAT  | 76  | 357 | 0.21 | 9.8  |                                       |
| AAGCTGCT  | 130 | 621 | 0.21 | 12.5 | MIR129                                |
| TTTGTCTGC | 104 | 522 | 0.20 | 10.7 | MIR116                                |
| GCTGCTAG  | 34  | 182 | 0.19 | 5.7  | MIR28                                 |
| AGCTGCTA  | 44  | 241 | 0.18 | 6.3  |                                       |

|             |          |     |      |      |        |
|-------------|----------|-----|------|------|--------|
| >cluster_21 | TTTTGTAC |     |      |      |        |
| TTTTGTAC    | 244      | 753 | 0.32 | 25.8 |        |
| CTTTTGTA    | 178      | 748 | 0.24 | 16.8 | MIR156 |
| TTTTGTAG    | 147      | 641 | 0.23 | 14.7 |        |
| GTTTTGTA    | 154      | 676 | 0.23 | 15.0 |        |
| TTTGTACT    | 134      | 614 | 0.22 | 13.4 |        |
| TTTGTATG    | 133      | 627 | 0.21 | 12.9 |        |
| CTTTGTAC    | 78       | 370 | 0.21 | 9.8  |        |
| CTTTGTAA    | 146      | 693 | 0.21 | 13.5 |        |
| TTTGTAAAC   | 103      | 492 | 0.21 | 11.2 |        |
| TTTGTACC    | 66       | 324 | 0.20 | 8.7  |        |
| ACTTTGTA    | 119      | 582 | 0.20 | 11.8 |        |
| ATTTGTAC    | 86       | 426 | 0.20 | 9.9  |        |
| TTTGTAGC    | 74       | 368 | 0.20 | 9.1  |        |
| TTTTTGTGC   | 103      | 524 | 0.20 | 10.5 |        |
| TTTGTAAAG   | 108      | 559 | 0.19 | 10.5 |        |
| TTTGTACG    | 14       | 73  | 0.19 | 9.1  |        |
| TCITTTGTA   | 122      | 651 | 0.19 | 10.8 |        |
| CATTTGTA    | 111      | 614 | 0.18 | 9.9  |        |
| CTTTGTAT    | 112      | 623 | 0.18 | 9.8  |        |

|             |          |     |      |      |                            |
|-------------|----------|-----|------|------|----------------------------|
| >cluster_22 | ACATTCCA |     |      |      |                            |
| ACATTCCA    | 127      | 402 | 0.32 | 18.2 | miR-206 miR-1 miR-122a(#2) |
| AACATTCC    | 80       | 315 | 0.25 | 12.0 |                            |
| TACATTCC    | 58       | 229 | 0.25 | 10.2 |                            |
| ACATTCCT    | 85       | 405 | 0.21 | 10.2 |                            |

|             |          |     |      |      |                   |
|-------------|----------|-----|------|------|-------------------|
| >cluster_23 | TGAATGTA |     |      |      |                   |
| TGAATGTA    | 183      | 594 | 0.31 | 21.4 | miR-181b(#1)      |
| GAATGTAT    | 107      | 461 | 0.23 | 12.7 |                   |
| TTGAATGT    | 123      | 586 | 0.21 | 12.3 | miR-181c miR-181a |
| GAATGTAG    | 47       | 228 | 0.21 | 7.5  |                   |
| GAATGTAA    | 98       | 476 | 0.21 | 10.8 |                   |
| GAATGTAC    | 40       | 214 | 0.19 | 6.2  |                   |
| AGAATGTA    | 88       | 479 | 0.18 | 9.0  |                   |

|             |          |    |      |     |  |
|-------------|----------|----|------|-----|--|
| >cluster_24 | ACGGTACA |    |      |     |  |
| ACGGTACA    | 7        | 23 | 0.30 | 8.5 |  |
| CGGTACAG    | 7        | 24 | 0.29 | 8.3 |  |
| CACGGTAC    | 6        | 27 | 0.22 | 6.5 |  |

|             |          |     |      |      |                          |
|-------------|----------|-----|------|------|--------------------------|
| >cluster_25 | CAGTATTA |     |      |      |                          |
| CAGTATTA    | 121      | 400 | 0.30 | 17.2 | miR-200c miR-200b MIR115 |
| ACAGTATT    | 142      | 551 | 0.26 | 16.2 |                          |
| CAGTATTT    | 179      | 811 | 0.22 | 15.6 |                          |
| TCAGTATT    | 124      | 577 | 0.22 | 12.7 |                          |
| CAGTATTG    | 61       | 301 | 0.20 | 8.3  |                          |

|             |          |     |      |      |                     |
|-------------|----------|-----|------|------|---------------------|
| >cluster_26 | TTGCATGT |     |      |      |                     |
| TTGCATGT    | 112      | 383 | 0.29 | 16.1 |                     |
| TGCATGCT    | 78       | 269 | 0.29 | 13.3 | MIR105              |
| TTGCATGC    | 44       | 170 | 0.26 | 9.0  |                     |
| TGCATGTT    | 118      | 456 | 0.26 | 14.8 |                     |
| TTGCATGA    | 72       | 279 | 0.26 | 11.5 |                     |
| AATGCATG    | 83       | 330 | 0.25 | 12.1 | MIR236              |
| GTGCATGC    | 49       | 196 | 0.25 | 9.2  |                     |
| CTGCATGC    | 67       | 270 | 0.25 | 10.7 | MIR152              |
| TGCATGTC    | 60       | 245 | 0.25 | 10.0 |                     |
| GTTGCATG    | 45       | 184 | 0.25 | 8.7  |                     |
| TGCATGTA    | 80       | 340 | 0.24 | 11.1 |                     |
| TGCATGAG    | 50       | 217 | 0.23 | 8.6  |                     |
| ATGCATGC    | 45       | 196 | 0.23 | 8.2  | MIR74 MIR105        |
| GCATGTTT    | 96       | 419 | 0.23 | 11.9 |                     |
| TGCATGAA    | 75       | 332 | 0.23 | 10.4 |                     |
| GTGCATGA    | 38       | 170 | 0.22 | 7.3  | MIR212              |
| TGCATGCC    | 47       | 211 | 0.22 | 8.1  |                     |
| AGTGCATG    | 47       | 211 | 0.22 | 8.1  | MIR212              |
| GCTGCATG    | 58       | 265 | 0.22 | 8.8  |                     |
| TAGCATGT    | 50       | 230 | 0.22 | 8.1  |                     |
| CTGCATGT    | 77       | 361 | 0.21 | 9.9  |                     |
| TGTGCATG    | 99       | 468 | 0.21 | 11.1 |                     |
| ATTGCATG    | 46       | 217 | 0.21 | 7.6  |                     |
| TGCATGCA    | 64       | 306 | 0.21 | 8.8  | MIR74 MIR193 MIR236 |
| TTGCATGG    | 52       | 255 | 0.20 | 7.8  |                     |
| TGCATGGA    | 52       | 256 | 0.20 | 7.7  |                     |
| ATGCATGT    | 82       | 413 | 0.20 | 9.5  |                     |
| TCTGCATG    | 71       | 361 | 0.20 | 8.7  |                     |
| GATGCATG    | 39       | 200 | 0.20 | 6.4  | MIR251              |
| ATGCATGA    | 43       | 220 | 0.20 | 6.7  |                     |
| GCATGTAA    | 43       | 224 | 0.19 | 6.6  |                     |
| CTGCATGA    | 53       | 276 | 0.19 | 7.3  |                     |
| CTTGCATG    | 44       | 234 | 0.19 | 6.5  |                     |

|             |          |     |      |      |                                       |
|-------------|----------|-----|------|------|---------------------------------------|
| TGCATGTG    | 90       | 482 | 0.19 | 9.2  |                                       |
| TGCATGAT    | 44       | 235 | 0.19 | 6.5  |                                       |
| >cluster_27 | TCGCATGA |     |      |      |                                       |
| TCGCATGA    | 6        | 21  | 0.29 | 7.6  |                                       |
| TCGCATGG    | 6        | 24  | 0.25 | 7.0  | MIR232                                |
| CTCGCATG    | 9        | 38  | 0.24 | 8.3  |                                       |
| TCGCATGC    | 6        | 27  | 0.22 | 6.5  |                                       |
| TAGCATGA    | 37       | 181 | 0.20 | 6.6  |                                       |
| TCCGCATG    | 8        | 43  | 0.19 | 6.7  |                                       |
| CGCATGCC    | 7        | 38  | 0.18 | 6.2  |                                       |
| >cluster_28 | CTCAGGGA |     |      |      |                                       |
| CTCAGGGA    | 129      | 451 | 0.29 | 16.9 | miR-125b miR-125a                     |
| CTCAGGAA    | 118      | 434 | 0.27 | 15.5 | MIR230                                |
| TCTCAGGG    | 96       | 382 | 0.25 | 13.0 |                                       |
| CTCAGGTA    | 39       | 156 | 0.25 | 8.2  |                                       |
| AACTCAGG    | 57       | 241 | 0.24 | 9.4  | MIR94                                 |
| TTCTCAGG    | 96       | 418 | 0.23 | 11.9 |                                       |
| ACTCAGGA    | 66       | 298 | 0.22 | 9.5  |                                       |
| ATCTCAGG    | 61       | 287 | 0.21 | 8.8  | MIR94                                 |
| ACTCAGGT    | 37       | 175 | 0.21 | 6.8  |                                       |
| ACTCAGGG    | 53       | 255 | 0.21 | 8.0  |                                       |
| TCTCAGGT    | 51       | 248 | 0.21 | 7.7  | MIR107 MIR190                         |
| TCAGGGAA    | 90       | 436 | 0.21 | 10.3 |                                       |
| TTCAGGGA    | 81       | 395 | 0.21 | 9.7  |                                       |
| TCTCAGGA    | 79       | 402 | 0.20 | 9.2  |                                       |
| TTTCAGGG    | 80       | 417 | 0.19 | 9.0  | MIR136 MIR138                         |
| TCAGGGAT    | 47       | 245 | 0.19 | 6.9  |                                       |
| CTCAGGTT    | 46       | 252 | 0.18 | 6.4  |                                       |
| >cluster_29 | CAAGTGCC |     |      |      |                                       |
| CAAGTGCC    | 80       | 285 | 0.28 | 13.1 | MIR196                                |
| AAAGTGCC    | 69       | 278 | 0.25 | 10.9 |                                       |
| TAAGTGCC    | 45       | 192 | 0.23 | 8.3  |                                       |
| GAAGTGCC    | 45       | 210 | 0.21 | 7.6  | MIR23                                 |
| AAGTGAT     | 56       | 267 | 0.21 | 8.3  |                                       |
| TCAAGTGC    | 36       | 184 | 0.20 | 6.2  |                                       |
| TAAAGTGC    | 53       | 293 | 0.18 | 6.8  |                                       |
| >cluster_30 | ACTACTGA |     |      |      |                                       |
| ACTACTGA    | 58       | 207 | 0.28 | 11.1 |                                       |
| TACTACTG    | 46       | 203 | 0.23 | 8.1  |                                       |
| AACTACTG    | 52       | 252 | 0.21 | 7.9  |                                       |
| >cluster_31 | TGGACCAA |     |      |      |                                       |
| TGGACCAA    | 67       | 240 | 0.28 | 11.9 | MIR32                                 |
| GTGACCAA    | 45       | 215 | 0.21 | 7.4  | MIR97 MIR247                          |
| GGACCAA     | 44       | 214 | 0.21 | 7.2  | miR-133b miR-133a                     |
| >cluster_32 | GTAATAG  |     |      |      |                                       |
| GTAATAG     | 88       | 317 | 0.28 | 13.6 |                                       |
| CTGTAAAT    | 180      | 671 | 0.27 | 18.9 |                                       |
| GTGTAAAT    | 118      | 491 | 0.24 | 13.8 | MIR191                                |
| TGTAAATG    | 176      | 764 | 0.23 | 16.2 | MIR191                                |
| GTAATAC     | 78       | 348 | 0.22 | 10.5 |                                       |
| >cluster_33 | TGTAGATA |     |      |      |                                       |
| TGTAGATA    | 81       | 295 | 0.28 | 12.9 |                                       |
| >cluster_34 | ACACTACA |     |      |      |                                       |
| ACACTACA    | 54       | 199 | 0.27 | 10.4 | miR-142-3p MIR95                      |
| AACACTAA    | 90       | 334 | 0.27 | 13.4 |                                       |
| AACACTAC    | 39       | 160 | 0.24 | 8.0  |                                       |
| TAACACTA    | 46       | 198 | 0.23 | 8.3  |                                       |
| ACACTAAT    | 39       | 205 | 0.19 | 6.2  | MIR211 MIR256                         |
| >cluster_35 | GTACAGTT |     |      |      |                                       |
| GTACAGTT    | 81       | 313 | 0.26 | 12.3 |                                       |
| GTACAGAA    | 68       | 334 | 0.20 | 8.8  |                                       |
| GTACAGAT    | 44       | 223 | 0.20 | 6.9  |                                       |
| GTACAGTA    | 55       | 285 | 0.19 | 7.5  |                                       |
| GTACAGTG    | 43       | 229 | 0.19 | 6.4  |                                       |
| GTACAGAG    | 39       | 214 | 0.18 | 5.9  | MIR65                                 |
| >cluster_36 | CACCAGCA |     |      |      |                                       |
| CACCAGCA    | 104      | 405 | 0.26 | 13.8 | miR-138(#1) MIR10 MIR25 MIR102 MIR213 |
| ACCAGCAT    | 51       | 234 | 0.22 | 8.2  |                                       |
| TCACCAGC    | 62       | 318 | 0.20 | 8.1  | MIR25 MIR102                          |
| >cluster_37 | GGTACGAA |     |      |      |                                       |
| GGTACGAA    | 7        | 28  | 0.25 | 7.6  |                                       |
| TGGTACGA    | 6        | 25  | 0.24 | 6.8  | miR-126(#2)                           |
| >cluster_38 | TGTATAGT |     |      |      |                                       |
| TGTATAGT    | 77       | 315 | 0.24 | 11.3 |                                       |
| CTGTATAT    | 127      | 536 | 0.24 | 14.1 |                                       |

|             |          |     |      |      |                                  |
|-------------|----------|-----|------|------|----------------------------------|
| TTGTATAG    | 70       | 316 | 0.22 | 9.8  |                                  |
| TGTATAGA    | 72       | 326 | 0.22 | 9.9  |                                  |
| TCTGTATA    | 91       | 465 | 0.20 | 9.8  |                                  |
| GTGTATAT    | 113      | 598 | 0.19 | 10.5 |                                  |
| GTTGTATA    | 52       | 276 | 0.19 | 7.1  |                                  |
| TGTGTATA    | 144      | 772 | 0.19 | 11.7 |                                  |
| CTTGTATA    | 62       | 336 | 0.19 | 7.6  | miR-381                          |
| GTATAGTT    | 39       | 213 | 0.18 | 5.9  |                                  |
| >cluster_39 | AAGGGCTA |     |      |      |                                  |
| AAGGGCTA    | 39       | 164 | 0.24 | 7.9  | MIR42                            |
| >cluster_40 | AGCTTTAA |     |      |      |                                  |
| AGCTTTAA    | 97       | 412 | 0.24 | 12.3 | MIR63                            |
| AAGCTTTA    | 74       | 378 | 0.20 | 8.8  |                                  |
| GCTTTAAT    | 58       | 308 | 0.19 | 7.5  |                                  |
| >cluster_41 | ATTTATCG |     |      |      |                                  |
| ATTTATCG    | 9        | 39  | 0.23 | 8.2  |                                  |
| >cluster_42 | GGCAGCTA |     |      |      |                                  |
| GGCAGCTA    | 39       | 172 | 0.23 | 7.5  | miR-22(#1) MIR164                |
| >cluster_43 | GCTGTAAA |     |      |      |                                  |
| GCTGTAAA    | 68       | 300 | 0.23 | 9.9  |                                  |
| TGCTGTAA    | 80       | 389 | 0.21 | 9.7  | MIR58 MIR197                     |
| CTTGTAAA    | 105      | 538 | 0.20 | 10.5 | MIR177                           |
| GTTGTAAA    | 84       | 440 | 0.19 | 9.1  |                                  |
| TCTGTAAA    | 131      | 707 | 0.19 | 11.0 | MIR173                           |
| TTGTAAAG    | 99       | 542 | 0.18 | 9.4  |                                  |
| >cluster_44 | GCACTAAT |     |      |      |                                  |
| GCACTAAT    | 26       | 120 | 0.22 | 5.8  |                                  |
| >cluster_45 | AAAGGTGC |     |      |      |                                  |
| AAAGGTGC    | 46       | 212 | 0.22 | 7.8  |                                  |
| >cluster_46 | ATGTAGCA |     |      |      |                                  |
| ATGTAGCA    | 57       | 265 | 0.22 | 8.6  | miR-221(#1) miR-222(#1)          |
| >cluster_47 | ACACTGGA |     |      |      |                                  |
| ACACTGGA    | 78       | 365 | 0.21 | 10.0 | miR-199b(#1) miR-199a(#1) MIR227 |
| AACTGGAA    | 101      | 501 | 0.20 | 10.7 | miR-145(#1) MIR220               |
| TAACTGGA    | 45       | 247 | 0.18 | 6.3  |                                  |
| >cluster_48 | GTATATAG |     |      |      |                                  |
| GTATATAG    | 54       | 253 | 0.21 | 8.3  |                                  |
| >cluster_49 | TTTGATAA |     |      |      |                                  |
| TTTGATAA    | 116      | 551 | 0.21 | 12.0 | miR-361(#2)                      |
| TTTGATAC    | 56       | 299 | 0.19 | 7.3  |                                  |
| >cluster_50 | AAGCATGC |     |      |      |                                  |
| AAGCATGC    | 35       | 166 | 0.21 | 6.6  |                                  |
| TTAGCATG    | 43       | 211 | 0.20 | 7.0  |                                  |
| AAAGCATG    | 76       | 380 | 0.20 | 9.2  |                                  |
| GCATGCTT    | 45       | 229 | 0.20 | 6.9  | MIR105                           |
| >cluster_51 | TGCACGAT |     |      |      |                                  |
| TGCACGAT    | 7        | 34  | 0.21 | 6.7  |                                  |
| GCACGATG    | 7        | 35  | 0.20 | 6.6  |                                  |
| TGCACGTT    | 16       | 81  | 0.20 | 9.9  |                                  |
| >cluster_52 | TCAGGTAA |     |      |      |                                  |
| TCAGGTAA    | 32       | 155 | 0.21 | 6.2  | MIR222                           |
| >cluster_53 | TTTCTATG |     |      |      |                                  |
| TTTCTATG    | 109      | 538 | 0.20 | 11.1 |                                  |
| TTTTCTAC    | 115      | 592 | 0.19 | 10.9 |                                  |
| >cluster_54 | TAATGTGA |     |      |      |                                  |
| TAATGTGA    | 75       | 370 | 0.20 | 9.2  | miR-323(#1)                      |
| AAATGTGA    | 172      | 945 | 0.18 | 12.3 | MIR61                            |
| >cluster_55 | TTTATTGC |     |      |      |                                  |
| TTTATTGC    | 99       | 496 | 0.20 | 10.4 |                                  |
| >cluster_56 | AAGCGCTT |     |      |      |                                  |
| AAGCGCTT    | 10       | 50  | 0.20 | 7.9  |                                  |



|             |           |     |      |      |                              |
|-------------|-----------|-----|------|------|------------------------------|
| >cluster_57 | GGGCATTA  | 122 | 0.20 | 5.1  | MIR138 MIR179                |
| GGGCATTA    | 24        |     |      |      |                              |
| AGCATTA     | 55        | 303 | 0.18 | 7.0  | miR-155                      |
| >cluster_58 | ATAGTGTA  | 183 | 0.20 | 6.2  |                              |
| ATAGTGTA    | 36        |     |      |      |                              |
| >cluster_59 | GTATTGTA  | 285 | 0.20 | 7.7  |                              |
| GTATTGTA    | 56        |     |      |      |                              |
| >cluster_60 | CACTGCCA  | 502 | 0.20 | 10.1 | miR-34a MIR141 MIR144 MIR199 |
| CACTGCCA    | 98        | 441 | 0.19 | 8.9  | MIR199                       |
| TCACTGCC    | 83        |     |      |      |                              |
| >cluster_61 | ATAAGCTA  | 206 | 0.19 | 6.4  | miR-21 miR-154(#3)           |
| ATAAGCTA    | 40        |     |      |      |                              |
| >cluster_62 | TAAAGCTT  | 409 | 0.19 | 8.8  |                              |
| TAAAGCTT    | 78        | 635 | 0.19 | 10.7 |                              |
| ATAAAGCA    | 119       | 432 | 0.18 | 8.4  |                              |
| ATAAAGCT    | 79        |     |      |      |                              |
| >cluster_63 | GTATTTTG  | 737 | 0.19 | 11.9 |                              |
| GTATTTTG    | 141       | 965 | 0.19 | 13.2 |                              |
| CTGTATTT    | 181       |     |      |      |                              |
| >cluster_64 | GTGGCCTT  | 394 | 0.19 | 8.6  | MIR128                       |
| GTGGCCTT    | 75        |     |      |      |                              |
| >cluster_65 | GA CTGTTA | 194 | 0.19 | 5.8  | miR-212 miR-132              |
| GA CTGTTA   | 36        |     |      |      |                              |
| >cluster_66 | CAGTGTTA  | 404 | 0.19 | 8.4  | miR-200a miR-141             |
| CAGTGTTA    | 75        |     |      |      |                              |
| >cluster_67 | AAAGGCTC  | 247 | 0.19 | 6.6  |                              |
| AAAGGCTC    | 46        |     |      |      |                              |
| >cluster_68 | TTTGTGCA  | 468 | 0.18 | 8.9  |                              |
| TTTGTGCA    | 86        |     |      |      |                              |
| >cluster_69 | TTTGGTAC  | 206 | 0.18 | 5.9  |                              |
| TTTGGTAC    | 38        |     |      |      |                              |
| >cluster_70 | TTTTGCTA  | 510 | 0.18 | 9.0  |                              |
| TTTTGCTA    | 92        |     |      |      |                              |
| >cluster_71 | GTCTTCCA  | 295 | 0.18 | 6.8  | miR-7                        |
| GTCTTCCA    | 53        |     |      |      |                              |
| >cluster_72 | GATTAAAG  | 250 | 0.18 | 6.2  |                              |
| GATTAAAG    | 45        |     |      |      |                              |

Supplementary Table S6 **Pairing of conserved 8-mer motifs to miRNA sequences****Perfect Waston-Crick pairing**

| miRNA          | Sequence (reverse strand) | matched motifs | C   | N   | pC   | MCS  |
|----------------|---------------------------|----------------|-----|-----|------|------|
| hsa-miR-92     | CAGGCCGGGACAAgtgcaata     | GTGCAATA       | 160 | 291 | 0.55 | 30.6 |
| hsa-miR-32     | GCAACTTAGTAATgtgcaata     | GTGCAATA       | 160 | 291 | 0.55 | 30.6 |
| hsa-miR-124a   | TGGCATTACCCGctaccttaA     | GTGCCCTTA      | 147 | 271 | 0.54 | 29.1 |
| hsa-miR-98     | AACAATACAACCTActacctca    | CTACCTCA       | 139 | 263 | 0.53 | 27.8 |
| hsa-let-7i     | ACAGCACAACCTActacctca     | CTACCTCA       | 139 | 263 | 0.53 | 27.8 |
| hsa-let-7g     | ACTGTACAAACTActacctca     | CTACCTCA       | 139 | 263 | 0.53 | 27.8 |
| hsa-let-7f     | AACTATACAACCTActacctca    | CTACCTCA       | 139 | 263 | 0.53 | 27.8 |
| hsa-let-7e     | ACTATACAACCTCctacctca     | CTACCTCA       | 139 | 263 | 0.53 | 27.8 |
| hsa-let-7c     | AACCATACAACCTActacctca    | CTACCTCA       | 139 | 263 | 0.53 | 27.8 |
| hsa-let-7b     | AACCACACAACCTActacctca    | CTACCTCA       | 139 | 263 | 0.53 | 27.8 |
| hsa-let-7a     | AACTATACAACCTActacctca    | CTACCTCA       | 139 | 263 | 0.53 | 27.8 |
| hsa-miR-9      | TCATACAGCTAGATAccaaaga    | ACCAAAGA       | 178 | 366 | 0.49 | 29.7 |
| hsa-miR-30e-5p | TCCAGTCAAGGAtatttaca      | TGTTTACA       | 369 | 771 | 0.48 | 42.3 |
| hsa-miR-30d    | CTTCCAGTCGGGGAtgtttaca    | TGTTTACA       | 369 | 771 | 0.48 | 42.3 |
| hsa-miR-30c    | GCTGAGAGTGTAGGAtgtttaca   | TGTTTACA       | 369 | 771 | 0.48 | 42.3 |
| hsa-miR-30b    | AGCTGAGTGTAGGAtgtttaca    | TGTTTACA       | 369 | 771 | 0.48 | 42.3 |
| hsa-miR-30a-5p | CTTCCAGTCGAGGAtatttaca    | TGTTTACA       | 369 | 771 | 0.48 | 42.3 |
| hsa-miR-20     | CTACCTGCACTATAAqcacttta   | GCACTTTA       | 193 | 405 | 0.48 | 30.5 |
| hsa-miR-106b   | ATCTGCACTGTCAqcacttta     | GCACTTTA       | 193 | 405 | 0.48 | 30.5 |
| hsa-miR-29c    | ACCGATTCAAAtgtgtcta       | TGGTGCTA       | 116 | 272 | 0.43 | 21.9 |
| hsa-miR-29b    | AACACTGATTCAAAtgtgtcta    | TGGTGCTA       | 116 | 272 | 0.43 | 21.9 |
| hsa-miR-29a    | AACCGATTTCAAGAtgtgtcta    | TGGTGCTA       | 116 | 272 | 0.43 | 21.9 |
| hsa-miR-153    | TCACCTTTGTGActatgcaa      | CTATGCAA       | 97  | 231 | 0.42 | 19.8 |
| hsa-miR-26b    | AACCTATCTGAATtacttcaa     | TACTTGAA       | 178 | 425 | 0.42 | 26.8 |
| hsa-miR-26a    | GCCTATCCTGGATtacttcaa     | TACTTGAA       | 178 | 425 | 0.42 | 26.8 |
| hsa-miR-96     | GCAAAAATGTGCTAgtgccaaa    | GTGCCAAA       | 118 | 291 | 0.41 | 21.3 |
| hsa-miR-101    | CTTCAGTTATCACAgctatgta    | GTAAGTGA       | 136 | 338 | 0.40 | 22.7 |
| hsa-miR-218    | ACATGGTTAGATCAaqaacaa     | AAGCACAA       | 157 | 393 | 0.40 | 24.3 |
| hsa-let-7d     | ACTATGCAACCTactacctcT     | ACTACCTC       | 63  | 160 | 0.39 | 15.2 |
| hsa-miR-99a    | CACAAGTCCGGATCtaccggtt    | TACGGGTT       | 8   | 21  | 0.38 | 10.4 |
| hsa-miR-100    | CACAAGTCCGGATCtaccggtt    | TACGGGTT       | 8   | 21  | 0.38 | 10.4 |
| hsa-miR-137    | CTACCGTATTCTTaaagcaata    | AAGCAATA       | 145 | 386 | 0.38 | 22.3 |
| hsa-miR-19b    | TCAGTTTTGCATGGAtttgcaca   | TTTGCA         | 207 | 583 | 0.36 | 25.5 |
| hsa-miR-19a    | TCAGTTTTGCATGGAtttgcaca   | TTTGCA         | 207 | 583 | 0.36 | 25.5 |
| hsa-miR-135b   | CACATAGGAATGAaaqccata     | AAGCCATA       | 92  | 261 | 0.35 | 16.9 |
| hsa-miR-135a   | TCACATAGGAATAAaaqccata    | AAGCCATA       | 92  | 261 | 0.35 | 16.9 |
| hsa-miR-27b    | GCAGAACTTAGCCactgtgaa     | ACTGTGAA       | 192 | 551 | 0.35 | 24.2 |
| hsa-miR-27a    | GCAGAACTTAGCCactgtgaa     | ACTGTGAA       | 192 | 551 | 0.35 | 24.2 |
| hsa-miR-182    | TGTGAGTTCTACCAAttgccaaa   | TTGCCAAA       | 172 | 521 | 0.33 | 22.0 |
| hsa-miR-367    | TCACCATTGCTAAagtcaatT     | AGTGCAAT       | 90  | 273 | 0.33 | 15.9 |
| hsa-miR-25     | TCAGACCGAGACAagtcaatG     | AGTGCAAT       | 90  | 273 | 0.33 | 15.9 |
| hsa-miR-195    | GCCAATATTTCTgtactcta      | TGCTGCTA       | 124 | 380 | 0.33 | 18.5 |
| hsa-miR-16     | CGCCAATATTTACGtctgcta     | TGCTGCTA       | 124 | 380 | 0.33 | 18.5 |
| hsa-miR-15b    | TGTAACCATGATGtctgcta      | TGCTGCTA       | 124 | 380 | 0.33 | 18.5 |
| hsa-miR-15a    | CACAAACCATATGtctgcta      | TGCTGCTA       | 124 | 380 | 0.33 | 18.5 |
| hsa-miR-128b   | GAAAGAGACCGGTTcactgtga    | CACTGTGA       | 132 | 414 | 0.32 | 18.7 |
| hsa-miR-128a   | AAAAGAGACCGGTTcactgtga    | CACTGTGA       | 132 | 414 | 0.32 | 18.7 |
| hsa-miR-206    | CCACACTTCTTcaattcca       | ACATTCCA       | 127 | 402 | 0.32 | 18.2 |
| hsa-miR-1      | TACATCTTCTTtacttcca       | ACATTCCA       | 127 | 402 | 0.32 | 18.2 |
| hsa-miR-93     | CTACCTGCACGAAcagcattt     | AGCACTTT       | 190 | 601 | 0.32 | 22.3 |
| hsa-miR-372    | ACGCTCAAAATGTGcagcattt    | AGCACTTT       | 190 | 601 | 0.32 | 22.3 |
| hsa-miR-17-5p  | ACTACCTGCACTGTAAgcaatttG  | AGCACTTT       | 190 | 601 | 0.32 | 22.3 |
| hsa-miR-106a   | GCTACCTGCACTGTAAgcaatttT  | AGCACTTT       | 190 | 601 | 0.32 | 22.3 |
| hsa-miR-200c   | CCATCATATACCCGcagtatta    | CAGTATTA       | 121 | 400 | 0.30 | 17.2 |
| hsa-miR-200b   | GTCATCATTACCCGcagtatta    | CAGTATTA       | 121 | 400 | 0.30 | 17.2 |
| hsa-miR-219    | AGAATTGGGTTTgaaacatca     | GACAATCA       | 46  | 155 | 0.30 | 10.4 |
| hsa-miR-125b   | TCACAAGTTAGGGTctcagggga   | CTCAGGGA       | 129 | 451 | 0.29 | 16.9 |
| hsa-miR-125a   | CACAGTTAAAGGGTctcagggga   | CTCAGGGA       | 129 | 451 | 0.29 | 16.9 |
| hsa-miR-301    | GCTTTGACAATACTAttgcaactg  | TTGCACTG       | 110 | 399 | 0.28 | 15.1 |
| hsa-miR-130b   | ATGCCCTTTTCAAttgcaactg    | TTGCACTG       | 110 | 399 | 0.28 | 15.1 |
| hsa-miR-130a   | ATGCCCTTTTAAAttgcaactg    | TTGCACTG       | 110 | 399 | 0.28 | 15.1 |
| hsa-miR-142-3p | TCATAAAGTAGGAaactactaca   | ACACTACA       | 54  | 199 | 0.27 | 10.4 |
| hsa-miR-152    | CCCAAGTTCTGTCAactactqa    | TGCACTGA       | 103 | 403 | 0.26 | 13.7 |
| hsa-miR-148b   | ACAAAGTTCTGTGAtgcaactga   | TGCACTGA       | 103 | 403 | 0.26 | 13.7 |
| hsa-miR-148a   | ACAAAGTTCTGTGAtgcaactga   | TGCACTGA       | 103 | 403 | 0.26 | 13.7 |
| hsa-miR-302d   | ACACTCAAAATGGaagcacttA    | AAGCACTT       | 123 | 483 | 0.26 | 14.9 |
| hsa-miR-302c   | CCACTGAAACATGGaagcacttA   | AAGCACTT       | 123 | 483 | 0.26 | 14.9 |
| hsa-miR-302b   | CTACTAAAACATGGaagcacttA   | AAGCACTT       | 123 | 483 | 0.26 | 14.9 |
| hsa-miR-302a   | TCACCAAAACATGGaagcacttA   | AAGCACTT       | 123 | 483 | 0.26 | 14.9 |
| hsa-miR-373    | ACACCCAAAATCGaagcacttC    | AAGCACTT       | 123 | 483 | 0.26 | 14.9 |
| hsa-miR-199a*  | AACCAATGTGCAGActactgta    | CTACTGTA       | 69  | 283 | 0.24 | 10.7 |
| hsa-miR-183    | CAGTGAATTCTACCagtgcata    | GTGCCATA       | 41  | 170 | 0.24 | 8.2  |
| hsa-miR-196b   | CCAACAACAGGAaactactA      | AACTACCT       | 43  | 194 | 0.22 | 7.7  |
| hsa-miR-196a   | CCAACAACATGAaactactA      | AACTACCT       | 43  | 194 | 0.22 | 7.7  |
| hsa-miR-424    | TTCAAAAACATGAAttgctgctG   | TTGCTGCT       | 145 | 664 | 0.22 | 13.9 |
| hsa-miR-139    | AGACACGtgcactgtAGA        | TGCACTGT       | 90  | 418 | 0.22 | 10.8 |
| hsa-miR-181c   | ACTCACCGACAGGttgaatgtT    | TTGAATGT       | 123 | 586 | 0.21 | 12.3 |
| hsa-miR-181a   | ACTCACCGACAGGttgaatgtT    | TTGAATGT       | 123 | 586 | 0.21 | 12.3 |
| hsa-miR-133b   | TAGCTGGTTGAAggggaccaa     | GGGACCAA       | 44  | 214 | 0.21 | 7.2  |
| hsa-miR-133a   | ACAGCTGGTTGAAggggaccaa    | GGGACCAA       | 44  | 214 | 0.21 | 7.2  |
| hsa-miR-34a    | AACAACCAAGTAAgcaactacca   | CACTGCCA       | 98  | 502 | 0.20 | 10.1 |
| hsa-miR-21     | TCAACATCAGTCTgataagcta    | ATAAGCTA       | 40  | 206 | 0.19 | 6.4  |
| hsa-miR-144    | CTAGTACATCATCTatactgta    | ATACTGTA       | 80  | 420 | 0.19 | 8.9  |
| hsa-miR-212    | GGCCGTGACTGGAgactgtta     | GACTGTTA       | 36  | 194 | 0.19 | 5.8  |
| hsa-miR-200a   | ACATCGTTACCAGAcaatgatta   | CAGTGTTA       | 75  | 404 | 0.19 | 8.4  |
| hsa-miR-141    | CCATCTTTACCAGAcagtgtta    | CAGTGTTA       | 75  | 404 | 0.19 | 8.4  |
| hsa-miR-132    | CGACCATGGCTGTAgactgtta    | GACTGTTA       | 36  | 194 | 0.19 | 5.8  |
| hsa-miR-381    | ACAGAGAGCTTGCcttata       | CTTGATA        | 62  | 336 | 0.19 | 7.6  |
| hsa-miR-155    | CCCCTATCACGATTAgcatttaa   | AGCATTA        | 55  | 303 | 0.18 | 7.0  |
| hsa-miR-7      | CAACAAAATCACTAgcttcca     | GTCTTCCA       | 53  | 295 | 0.18 | 6.8  |

Supplementary Table S6, Continued

**Allow one-base mismatch in Watson-Crick pairing**

| miRNA                                                                                   | Sequence (reverse strand) | matched motifs | C   | N   | pC   | MCS  | last 8-mer in miRNA | matched motifs (allow one mismatch) | C   | N   | pC   | MCS  | Mismatched pairing |
|-----------------------------------------------------------------------------------------|---------------------------|----------------|-----|-----|------|------|---------------------|-------------------------------------|-----|-----|------|------|--------------------|
| <b>T-G pairing</b>                                                                      |                           |                |     |     |      |      |                     |                                     |     |     |      |      |                    |
| hsa-miR-126                                                                             | GCATTATTACTCAcggtagca     | CGGTACGA       | 0   | 7   | 0.00 | -0.4 | CGGTACGA            | TGGTACGA                            | 6   | 25  | 0.24 | 6.8  | C->T               |
| hsa-miR-18                                                                              | TATCTGCACTAGATqacacctta   | GCACCTTA       | 24  | 137 | 0.18 | 4.4  | GCACCTTA            | GCACCTTA                            | 193 | 405 | 0.48 | 30.5 | C->T               |
| hsa-miR-361                                                                             | GTACCCCTGGAGATtctgataa    | TCTGATAA       | 36  | 284 | 0.13 | 3.3  | TCTGATAA            | TTTGATAA                            | 116 | 551 | 0.21 | 12.0 | C->T               |
| hsa-miR-122a                                                                            | ACAAACACCATTTGCacactcca   | ACACTCCA       | 23  | 228 | 0.10 | 1.4  | ACACTCCA            | ACATTCCA                            | 127 | 402 | 0.32 | 18.2 | C->T               |
| <b>Mismatch between first base of miRNA and last letter 'A' of the conserved motifs</b> |                           |                |     |     |      |      |                     |                                     |     |     |      |      |                    |
| hsa-miR-181b                                                                            | CCCACCGACAGCAatqatgtT     | ATGAATGT       | 108 | 626 | 0.17 | 9.2  | TGAATGTT            | TGAATGTA                            | 183 | 594 | 0.31 | 21.4 | T->A               |
| hsa-miR-323                                                                             | AGAGGTGCACCGtataatgtGC    | TGTAATGT       | 76  | 451 | 0.17 | 7.5  | TAATGTGC            | TAATGTGA                            | 75  | 370 | 0.20 | 9.2  | C->A               |
| hsa-miR-221                                                                             | GAAACCCAGCAGACaataatqacT  | AATGTAGC       | 41  | 244 | 0.17 | 5.5  | ATGTAGCT            | ATGTAGCA                            | 57  | 265 | 0.22 | 8.6  | T->A               |
| hsa-miR-145                                                                             | AAGGGATTCTGGGAaaaactggaC  | AAACTGGA       | 78  | 466 | 0.17 | 7.5  | AACTGGAC            | AACTGGAA                            | 101 | 501 | 0.20 | 10.7 | C->A               |
| hsa-miR-199b                                                                            | GAACAGATAGTCTAaacactggG   | AACACTGG       | 47  | 316 | 0.15 | 4.9  | ACACTGGG            | ACACTGGA                            | 78  | 365 | 0.21 | 10.0 | G->A               |
| hsa-miR-199a                                                                            | GAACAGGTAGTCTGaactctggG   | AACACTGG       | 47  | 316 | 0.15 | 4.9  | ACACTGGG            | ACACTGGA                            | 78  | 365 | 0.21 | 10.0 | G->A               |
| hsa-miR-23b                                                                             | GGTAATCCCTGGcaaatqaaT     | CAATGTGA       | 45  | 310 | 0.15 | 4.6  | AATGTGAT            | AATGTGAA                            | 207 | 872 | 0.24 | 18.1 | T->A               |
| hsa-miR-23a                                                                             | GGAAATCCCTGGcaaatqaaT     | CAATGTGA       | 45  | 310 | 0.15 | 4.6  | AATGTGAT            | AATGTGAA                            | 207 | 872 | 0.24 | 18.1 | T->A               |
| hsa-miR-138                                                                             | GATTCACAcaccagcT          | ACACCAGC       | 35  | 271 | 0.13 | 3.3  | CACCAGCT            | CACCAGCA                            | 104 | 405 | 0.26 | 13.8 | T->A               |
| hsa-miR-22                                                                              | ACAGTTCCTCAAcacacqactT    | TGGCAGCT       | 54  | 460 | 0.12 | 3.4  | GGCAGCTT            | GGCAGCTA                            | 39  | 172 | 0.23 | 7.5  | T->A               |
| hsa-miR-222                                                                             | GAGACCCAGTAGCCAgatqtagct  | ATGTAGCT       | 30  | 268 | 0.11 | 2.3  | ATGTAGCT            | ATGTAGCA                            | 57  | 265 | 0.22 | 8.6  | T->A               |
| <b>Other mismatches</b>                                                                 |                           |                |     |     |      |      |                     |                                     |     |     |      |      |                    |
| hsa-miR-34c                                                                             | GCAATCAGCTAACTacactaccT   | ACACTGCC       | 55  | 323 | 0.17 | 6.4  | CACTGCCT            | CAGTGCCT                            | 102 | 512 | 0.20 | 10.6 | C->G               |
| hsa-miR-107                                                                             | TGATAGCCCTGTACAatqctqct   | ATGCTGCT       | 80  | 501 | 0.16 | 7.1  | ATGCTGCT            | ATGGTGTCT                           | 108 | 343 | 0.32 | 16.8 | C->G               |
| hsa-miR-103                                                                             | TCATAGCCCTGTACAatqctqct   | ATGCTGCT       | 80  | 501 | 0.16 | 7.1  | ATGCTGCT            | ATGGTGTCT                           | 108 | 343 | 0.32 | 16.8 | C->G               |
| hsa-miR-330                                                                             | TCTCTGCAGGCCgtgtqctTGC    | GTGTGCTT       | 46  | 327 | 0.14 | 4.5  | TGCTTTGC            | TGCCTTGC                            | 62  | 336 | 0.19 | 7.6  | T->C               |
| hsa-miR-208                                                                             | ACAAGCTTTTTGCctgctctaT    | TCGTCTTA       | 4   | 33  | 0.12 | 3.5  | CGTCTTAT            | CGCCTTAT                            | 6   | 24  | 0.25 | 7.0  | T->C               |
| hsa-miR-224                                                                             | TAAACGGAAACCActagtqactTG  | TAGTGACT       | 19  | 185 | 0.10 | 1.4  | GTGACTTG            | GTGCCTTG                            | 133 | 355 | 0.38 | 21.3 | A->C               |
| hsa-miR-99b                                                                             | CGCAAGGTCGGttctacggGTG    | TTCTACGG       | 2   | 32  | 0.06 | 1.3  | TAGGGGTG            | TACGGGTT                            | 8   | 21  | 0.38 | 10.4 | G->T               |
| hsa-miR-9*                                                                              | ACTTTCGGTTATCtaacttta     | TAGCTTTA       | 52  | 326 | 0.16 | 5.7  | TAGCTTTA            | TAGCCTTA                            | 33  | 162 | 0.20 | 6.2  | T->C               |
| hsa-miR-34b                                                                             | CAATCAGCTAATGacactgqccTA  | ACACTGCC       | 55  | 323 | 0.17 | 6.4  | ACTGCCTA            | AGTGCCTA                            | 41  | 185 | 0.22 | 7.5  | C->G               |
| hsa-miR-217                                                                             | ATCCAATCAGTTCTGatgcagta   | ATGCAGTA       | 32  | 253 | 0.13 | 3.1  | ATGCAGTA            | ATGCAATA                            | 85  | 294 | 0.29 | 13.8 | G->A               |
| hsa-miR-338                                                                             | TCAACAAAATCACTgatqctggA   | GATGCTGG       | 25  | 318 | 0.08 | 0.2  | ATGCTGGA            | ATGCTGCA                            | 75  | 332 | 0.23 | 10.4 | G->C               |
| hsa-miR-154                                                                             | CGAAGGCAACACGGAataactta   | ATAACCTA       | 10  | 141 | 0.07 | -0.2 | ATAACCTA            | ATAAGCTA                            | 40  | 206 | 0.19 | 6.4  | C->G               |

**C:** Number of conserved instances  
**N:** Number of total instances in human sequences  
**pC:** Conservation rate  
**MCS:** Conservation Score

Supplementary Table S7 **Discovered 3' UTR motifs not related to miRNA**

| No. | Motif            | Conserved Num | Total Num | Pc   | MCS   |
|-----|------------------|---------------|-----------|------|-------|
| 1   | AATAAA           | 6617          | 14266     | 0.46 | 135.7 |
| 2   | TATTTAT          | 1758          | 3706      | 0.47 | 79.4  |
| 3   | TGTAnATA         | 1528          | 2968      | 0.51 | 70.4  |
| 4   | TATTTTT          | 2068          | 6861      | 0.30 | 58.9  |
| 5   | TTTGTA           | 2777          | 8873      | 0.31 | 53.4  |
| 6   | TTTTATA          | 1185          | 3861      | 0.31 | 45.4  |
| 7   | TTTTGT           | 3185          | 13094     | 0.24 | 41.7  |
| 8   | TGTRnnTTT        | 1575          | 6878      | 0.23 | 36.9  |
| 9   | TAATTTAT         | 331           | 868       | 0.38 | 33.3  |
| 10  | TGTACAKW         | 712           | 2048      | 0.35 | 33.0  |
| 11  | TGTRnnnnTGT      | 1018          | 4650      | 0.22 | 31.1  |
| 12  | AGCMWTAA         | 348           | 1064      | 0.33 | 29.0  |
| 13  | TATTTAAA         | 665           | 2800      | 0.24 | 26.0  |
| 14  | TGTRnnATA        | 678           | 2727      | 0.25 | 25.0  |
| 15  | TATTTATTG        | 152           | 344       | 0.44 | 24.1  |
| 16  | WnTATWTTG        | 707           | 3180      | 0.22 | 23.4  |
| 17  | WGTAWWTATT       | 229           | 742       | 0.31 | 22.8  |
| 18  | TTTnnnYGTA       | 685           | 3322      | 0.21 | 22.0  |
| 19  | TAATATAT         | 192           | 641       | 0.30 | 20.9  |
| 20  | TATWTTnnTAC      | 145           | 440       | 0.33 | 20.7  |
| 21  | TTTKnnTAC        | 686           | 3330      | 0.21 | 19.9  |
| 22  | WRTAAATG         | 550           | 2736      | 0.20 | 19.4  |
| 23  | TGTAnnnTAT       | 421           | 1786      | 0.24 | 18.6  |
| 24  | TGTAnnWnTGTA     | 113           | 313       | 0.36 | 18.6  |
| 25  | TTcnnWATAAA      | 127           | 511       | 0.25 | 17.0  |
| 26  | CTTWRTAA         | 325           | 1584      | 0.21 | 16.4  |
| 27  | CTATKYATT        | 130           | 491       | 0.26 | 16.1  |
| 28  | YGTAnAKRnTTT     | 112           | 353       | 0.32 | 15.7  |
| 29  | CTCRnTAAA        | 117           | 525       | 0.22 | 15.1  |
| 30  | TnTATnTGTAAnR    | 139           | 598       | 0.23 | 14.9  |
| 31  | TGCnnWRTAAA      | 122           | 513       | 0.24 | 14.8  |
| 32  | TGTRCCA          | 220           | 988       | 0.22 | 14.7  |
| 33  | TGTnnnAWTAAA     | 128           | 608       | 0.21 | 14.6  |
| 34  | AATAWAnnTTG      | 110           | 489       | 0.22 | 14.5  |
| 35  | WRTAAnnnnYGTAAnW | 108           | 437       | 0.25 | 14.3  |
| 36  | GTTWnTAT         | 240           | 1170      | 0.21 | 14.3  |
| 37  | AWTAAAnnCTT      | 109           | 530       | 0.21 | 13.7  |
| 38  | TATTTWnATG       | 142           | 610       | 0.23 | 13.7  |
| 39  | ATAnTGTAAnW      | 230           | 989       | 0.23 | 13.6  |
| 40  | TTcAnTAAA        | 117           | 553       | 0.21 | 13.3  |
| 41  | TTTnnnRYCAAA     | 128           | 616       | 0.21 | 12.8  |
| 42  | TTGKAWTTAW       | 117           | 480       | 0.24 | 12.8  |
| 43  | AATRMAAnTGT      | 165           | 823       | 0.20 | 12.8  |
| 44  | TCTRTRnATA       | 124           | 531       | 0.23 | 11.9  |
| 45  | AATMWAGTT        | 117           | 577       | 0.20 | 11.9  |
| 46  | TGTRYMAATR       | 113           | 482       | 0.23 | 11.8  |
| 47  | YAATRWAGC        | 106           | 488       | 0.22 | 11.7  |
| 48  | AGAnTATTWW       | 127           | 632       | 0.20 | 11.5  |
| 49  | AGAKnTnTATW      | 120           | 582       | 0.21 | 11.2  |
| 50  | WKTACWnKAAA      | 116           | 580       | 0.20 | 10.6  |
| 51  | TGTWnAnAGC       | 115           | 572       | 0.20 | 10.3  |
| 52  | YRAAGYnTTA       | 123           | 606       | 0.20 | 9.9   |
| 53  | YYGTAnnnnKATT    | 108           | 514       | 0.21 | 9.7   |
| 54  | GTTGTAnA         | 191           | 927       | 0.21 | 9.5   |
| 55  | GGTACGAA         | 8             | 25        | 0.32 | 9.3   |
| 56  | TATTKnnnnGTAnW   | 110           | 545       | 0.20 | 9.2   |
| 57  | CTTRYRnATA       | 111           | 513       | 0.22 | 8.4   |
| 58  | GTCAATAA         | 49            | 214       | 0.23 | 8.2   |
| 59  | TAACGGGT         | 5             | 14        | 0.36 | 7.8   |
| 60  | TRTAAAnTAC       | 116           | 574       | 0.20 | 7.5   |

Supplementary Table S10 **List of 3' primers used for tested miRNAs**

| miRNA ID      | Predicted miRNA mature sequence | Gene-specific 3' primer |
|---------------|---------------------------------|-------------------------|
| MIR1          | TATTGCACTCGTCCCAGCCTCC          | TGGAGGCCGGGACGA         |
| MIR21         | CACAGTGTGGTTTGGACGTGGC          | TGGCCACGTCCAAACC        |
| MIR41         | TTGCATATGTAGGATGTCCCAT          | GAGATGGGACATCCTACA      |
| MIR57         | AAGGCAACTTTTGTGAGTAT            | TTTGATACTCAACAAAAGT     |
| MIR115        | TAATACTGTCTGGTAAAACCGT          | GGACGGTTTTACCAGAC       |
| MIR134        | TTTGGTACTTGGAGAGTGGTTA          | GATAACCACTCTCCAAG       |
| MIR136        | CCCTGAAAATTTCTCATTAGG           | CTGGCCTAAATGAGAAATTT    |
| MIR138/MIR179 | TAATGCCCTAAAAATCCTTAT           | ACAATAAGGATTTTTAGGG     |
| MIR144        | TGGCAGTGTATTGTTAGCTGGT          | CAACCAGCTAACAATACA      |
| MIR156        | TACAAAAGCTTATTTGAACATG          | CCCATGTTCAAATAAGCT      |
| MIR178        | TTTTTCCGATGTGTTCTAATA           | TGCATATTAGGAACACATC     |
| MIR211        | ATTAGTGTGGGATGATCATGAC          | AATGTCATGATCATCCCA      |

Supplementary Table S11 **List of predicted miRNAs that share high sequence similarity to known miRNAs**

| <b>ID</b> | <b>Predicted miRNA sequence</b> | <b>Predicted miRNA location</b> | <b>Known miRNA</b> | <b>known miRNA sequence</b> | <b>Known miRNA location</b> | <b>Number of similar bases in ungapped alignment</b> |
|-----------|---------------------------------|---------------------------------|--------------------|-----------------------------|-----------------------------|------------------------------------------------------|
| MIR258    | TTAAGGTGCATCTAGTGCAGTT          | chrX:133029570-133029680        | hsa-mir-18         | TAAGGTGCATCTAGTGCAGATA      | chr13:90801006-90801076     | 20                                                   |
| MIR103    | CCAAAGTGCTCATAGTGCAGGT          | chrX:133029336-133029446        | hsa-mir-20         | TAAAGTGCTTATAGTGCAGGTAG     | chr13:90801320-90801390     | 19                                                   |
| MIR1      | TATTGCACTCGTCCCGGCTCC           | chr1:151978032-151978142        | hsa-mir-92         | TATTGCACTTGTCCCGGCTG        | chrX:133029088-133029162    | 19                                                   |
| MIR115    | CTAATACTGTCTGGTAAAACCG          | chr1:1144291-1144401            | hsa-mir-141        | TAACACTGTCTGGTAAAGATGG      | chr12:6943521-6943615       | 17                                                   |
| MIR199    | TTGGCAGTGATTATGCGGGTTG          | chr15:35094715-35094825         | hsa-mir-34a        | TGGCAGTGTCTTAGCTGGTTGTT     | chr1:9145993-9146102        | 16                                                   |
| MIR150    | TTATTGCCACAACCTTGGGGTG          | chrX:39268491-39268601          | hsa-mir-373        | GAAGTGCTTCGATTTTGGGGTGT     | chr19:58983771-58983839     | 15                                                   |
| MIR157    | GAAGGCACAGTTAAAGGGTCAT          | chr19:19461191-19461301         | hsa-mir-130a       | CAGTGAATGTTAAAAGGGCAT       | chr11:57165247-57165335     | 15                                                   |
| MIR192    | TTCACAGTGGGAGAAATATGCT          | chr1:117276990-117277100        | hsa-mir-27b        | TTCACAGTGGCTAAGTTCTGC       | chr9:94927282-94927378      | 15                                                   |
| MIR221    | ATCTTTGGCTGTATATCTTTCT          | chr10:77069708-77069818         | hsa-mir-9          | TCTTTGGTTATCTAGCTGTATGA     | chr15:87712252-87712341     | 15                                                   |
| MIR238    | TTCAGTGCAGAACTAAAATATG          | chr21:15392473-15392583         | hsa-mir-148a       | TCAGTGCACACAGAACTTTGT       | chr7:25762779-25762846      | 15                                                   |
| MIR243    | TTCAAGTAAATCACTTTTTGTC          | chr9:16793571-16793681          | hsa-mir-26b        | TTCAAGTAATTCAGGATAGGTT      | chr2:219092874-219092950    | 15                                                   |
| MIR252    | CATTGCACTGTATGAATCTGGA          | chr1:107675785-107675895        | hsa-mir-367        | AATTGCACTTTAGCAATGGTGA      | chr4:113926634-113926701    | 15                                                   |
| MIR257    | GTGTAACACCATAAAGCAAGC           | chr8:65341824-65341934          | hsa-mir-30b        | TGTAAACATCCTACACTCAGCT      | chr8:135881945-135882032    | 15                                                   |
| MIR87     | TTATGGCACCCATGGCTGCCTC          | chrX:138895637-138895747        | hsa-mir-346        | TGTCTGCCCGCATGCCTGCCTC      | chr10:88014424-88014509     | 15                                                   |
